# Supplementary material for: Transcriptome change in Staphylococcus aureus in infecting mice
Source: Research Square preprint supplement (doi:10.21203/rs.3.rs-636230/v1), 2021-07-02
Supplement: Supplementary file 1 [file 1836df6cfd82fdc4cdfb4de5.xlsx]

## Sheet: Sheet1
Supplementary Data set 2| Gene expression change in liver of mice after S. aureus infection compared with PBS treated mice
Gene name	6 h.p.i.		24 h.p.i.		48 h.p.i.
	Fold	FDR p-value	Fold	FDR p-value	Fold	FDR p-value
4933401J01Rik	0	0	0	0	0	0
Xkr4	2.9343	0.9999	1.30748	0.999974	1.74805	0.999982
Gm18956	0	0	0	0	0	0
Gm37180	0	0	0	0	0	0
Gm37363	0	0	0	0	0	0
Gm37686	0	0	0	0	0	0
Gm1992	0	0	0	0	0	0
Gm37329	0	0	0	0	0	0
Gm7341	0	0	0	0	0	0
Gm38148	0	0	0	0	0	0
Gm19938	0	0	0	0	0	0
Gm10568	0	0	0	0	0	0
Gm38385	0	0	0	0	0	0
Rp1	11.5218	0.9999	0	0	18.554	0.999982
Gm6101	0	0	0	0	0	0
Gm37483	0	0	0	0	0	0
Sox17	-2.41244	0.199308	1.32501	0.999974	-1.39849	0.999982
Gm7357	0	0	0	0	0	0
Gm38076	0	0	0	0	0	0
Gm7369	0	0	0	0	0	0
Gm6085	0	0	0	0	0	0
Gm6119	0	0	0	0	0	0
Gm2053	0	0	0	0	0	0
Gm6123	0	0	0	0	0	0
Mrpl15	-1.32594	0.9999	-1.77587	0.17224	-1.30172	0.999982
Gm37144	0	0	0	0	0	0
Lypla1	-2.07068	0.588201	-2.30463	0.227352	-1.80988	0.999982
Gm37988	0	0	0	0	0	0
Tcea1	-1.09719	0.9999	-1.32877	0.999974	1.02788	0.999982
Gm6104	0	0	0	0	0	0
Gm37277	0	0	0	0	0	0
Rgs20	-10.0542	0.687357	-1.28804	0.999974	2.62778	0.999982
Gm17100	0	0	0	0	0	0
Gm37079	0	0	0	0	0	0
Gm16041	0	0	0	0	0	0
Gm17101	0	0	0	0	0	0
Atp6v1h	1.38814	0.982368	-1.15619	0.999974	1.30894	0.999982
Gm7182	0	0	0	0	0	0
Gm37567	0	0	0	0	0	0
Gm38264	0	0	0	0	0	0
Oprk1	1.98349	0.9999	0	0	8.34775	0.999982
Gm36965	0	0	0	0	0	0
Gm37429	0	0	0	0	0	0
Npbwr1	-1.08311	0.9999	0	0	11.2638	0.999982
Gm19214	0	0	0	0	0	0
Rb1cc1	1.1497	0.9999	-1.06526	0.999974	1.07126	0.999982
4732440D04Rik	0	0	0	0	0	0
Fam150a	0	0	0	0	0	0
Gm2147	0	0	0	0	0	0
Gm7417	0	0	0	0	0	0
Gm19026	0	0	0	0	0	0
St18	2.16947	0.9999	0	0	9.7669	0.999982
Gm42492	0	0	0	0	0	0
Gm7449	0	0	0	0	0	0
Gm37108	0	0	0	0	0	0
Gm37275	0	0	0	0	0	0
Gm37225	0	0	0	0	0	0
Gm37489	0	0	0	0	0	0
Gm5694	0	0	0	0	0	0
Pcmtd1	-1.83578	0.457159	-2.39379	0.0291901	-1.27149	0.999982
Gm26983	0	0	0	0	0	0
Gm38372	0	0	0	0	0	0
Gm9826	0	0	0	0	0	0
Nras-ps2	0	0	0	0	0	0
Gm19002	0	0	0	0	0	0
Gm18984	0	0	0	0	0	0
Gm37791	0	0	0	0	0	0
Gm7470	0	0	0	0	0	0
Rps2-ps2	0	0	0	0	0	0
Gm38216	0	0	0	0	0	0
Sntg1	2.06791	0.855334	1.86161	0.849578	-1.66378	0.999982
Gm38024	0	0	0	0	0	0
Gm16284	0	0	0	0	0	0
Gm38259	0	0	0	0	0	0
Gm37005	0	0	0	0	0	0
Gm15452	0	0	0	0	0	0
Gm36964	0	0	0	0	0	0
Gm6152	0	0	0	0	0	0
Gm7445	0	0	0	0	0	0
Gm7493	0	0	0	0	0	0
Gm37629	0	0	0	0	0	0
Gm38008	0	0	0	0	0	0
Gm37143	0	0	0	0	0	0
Gm6187	0	0	0	0	0	0
Gm18299	0	0	0	0	0	0
Gm7512	0	0	0	0	0	0
Gm18300	0	0	0	0	0	0
Rrs1	-1.07811	0.9999	-1.17242	0.999974	1.7152	0.414612
Adhfe1	-1.09214	0.9999	-1.17666	0.999974	1.08478	0.999982
Gm6161	0	0	0	0	0	0
3110035E14Rik	6.22392	0.0435665	1.3269	0.999974	1.79479	0.999982
Mybl1	33.5216	1.182e-11	3.55169	0.143949	4.56061	0.0282216
Vcpip1	1.66231	0.513709	1.02736	0.999974	1.09686	0.999982
1700034P13Rik	0	0	0	0	0	0
Sgk3	1.12093	0.9999	-1.06099	0.999974	1.20037	0.999982
Gm6195	0	0	0	0	0	0
Mcmdc2	-1.18985	0.9999	1.33118	0.999974	1.74754	0.999982
Tcf24	-2.40905	0.112144	-2.06748	0.248137	1.06526	0.999982
E330040D14Rik	0	0	0	0	0	0
Ppp1r42	-2.58137	0.9999	-1.55352	0.999974	-2.19724	0.999982
Gm15818	0	0	0	0	0	0
Cops5	-1.0492	0.9999	-1.71928	0.281738	-1.9416	0.302935
Cspp1	2.56267	0.0299367	1.73399	0.174104	-1.41754	0.999982
1700047N06Rik	0	0	0	0	0	0
Arfgef1	-1.10887	0.9999	-1.03801	0.999974	-1.46855	0.999982
Gm37569	0	0	0	0	0	0
Cpa6	0	0	0	0	0	0
Gm38005	0	0	0	0	0	0
Gm15604	0	0	0	0	0	0
Gm15603	0	0	0	0	0	0
Gm37133	0	0	0	0	0	0
Gm5522	0	0	0	0	0	0
Gm28659	0	0	0	0	0	0
Prex2	1.03826	0.9999	-1.01168	0.999974	1.28684	0.999982
Gm28686	0	0	0	0	0	0
Gm37410	0	0	0	0	0	0
A830018L16Rik	-1.35308	0.9999	-2.06177	0.999974	1.09501	0.999982
Gm38178	0	0	0	0	0	0
Gm29273	0	0	0	0	0	0
Gm38069	0	0	0	0	0	0
Gm7560	0	0	0	0	0	0
Gm2383	0	0	0	0	0	0
Gm6216	0	0	0	0	0	0
Sulf1	1.13447	0.9999	-2.40206	0.169877	-1.0554	0.999982
Slco5a1	1.98694	0.9999	1.03227	0.999974	1.68618	0.999982
Gm37162	0	0	0	0	0	0
Gm5250	0	0	0	0	0	0
Prdm14	14.7052	0.9999	0	0	12.7222	0.999982
Ncoa2	-1.13899	0.9999	1.03374	0.999974	1.16772	0.999982
Gm38376	0	0	0	0	0	0
Gm37409	0	0	0	0	0	0
Gm38223	0	0	0	0	0	0
Gm37702	0	0	0	0	0	0
Gm38120	0	0	0	0	0	0
Gm38380	0	0	0	0	0	0
Gm29570	0	0	0	0	0	0
Gm7593	0	0	0	0	0	0
Tram1	-1.37128	0.9999	-1.12224	0.999974	1.781	0.952425
Lactb2	-2.22899	0.31069	-2.35792	0.202047	-5.04636	0.0011311
Gm38319	0	0	0	0	0	0
Xkr9	1.35672	0.9999	-1.95643	0.144096	-2.49227	0.0238276
Gm5523	0	0	0	0	0	0
Gm36947	0	0	0	0	0	0
Gm37400	0	0	0	0	0	0
Eya1	12.5855	0.9999	4.9321	0.999974	6.88943	0.999982
Gm37444	0	0	0	0	0	0
Gm9947	0	0	0	0	0	0
Msc	-1.42136	0.9999	3.46674	0.36561	2.05316	0.999982
Gm37412	0	0	0	0	0	0
Smt3h2-ps4	0	0	0	0	0	0
Rpl5-ps1	0	0	0	0	0	0
Trpa1	-1.08311	0.9999	0	0	6.88975	0.999982
Gm10566	0	0	0	0	0	0
Kcnb2	-5.03088	0.673337	-9.36583	0.805992	-1.0833	0.999982
Gm38116	0	0	0	0	0	0
Gm37138	0	0	0	0	0	0
Gm6060	0	0	0	0	0	0
Gm28669	0	0	0	0	0	0
Terf1	-1.156	0.9999	-1.41829	0.825508	-3.04713	0.0104275
Gm37509	0	0	0	0	0	0
Sbspon	-3.73874	0.315692	-2.45886	0.937497	-2.11024	0.999982
Gm7634	0	0	0	0	0	0
4930444P10Rik	6.22803	0.9999	0	0	3.97332	0.999982
Rpl7	-1.26494	0.9999	-2.33472	0.0880303	1.4063	0.999982
Rdh10	-2.2979	0.0178591	-3.90157	1.53036e-06	-2.45327	0.00895013
Gm38249	0	0	0	0	0	0
Gm28095	0	0	0	0	0	0
Stau2	-1.10464	0.9999	-1.06953	0.999974	1.00767	0.999982
Gm7568	0	0	0	0	0	0
Ube2w	-1.22762	0.9999	-1.2088	0.999974	-1.11213	0.999982
Gm38342	0	0	0	0	0	0
Eloc	-1.37824	0.9999	-1.29171	0.999974	-1.09129	0.999982
Gm7654	0	0	0	0	0	0
Tmem70	-1.71222	0.497471	-3.27214	0.000415018	-1.68573	0.694883
Ly96	1.49065	0.9999	1.11104	0.999974	-1.05176	0.999982
Gm29649	0	0	0	0	0	0
Gm5828	0	0	0	0	0	0
Gm28376	0	0	0	0	0	0
4921511E07Rik	0	0	0	0	0	0
Jph1	-3.50794	0.0427707	-6.55704	0.00177135	-3.74463	0.0329168
Gdap1	-1.08311	0.9999	0	0	5.43159	0.999982
Gm28785	0	0	0	0	0	0
Gm5251	0	0	0	0	0	0
Rbm6-ps1	0	0	0	0	0	0
Gm6075	0	0	0	0	0	0
Pi15	-3.7981	0.051825	1.92212	0.624108	3.41241	0.0836569
Gm28154	0	0	0	0	0	0
Gm16070	0	0	0	0	0	0
Crispld1	-1.47276	0.9999	-1.28726	0.999974	2.3154	0.999982
Gm28153	0	0	0	0	0	0
Gm7690	0	0	0	0	0	0
Gm18775	0	0	0	0	0	0
Gm17969	0	0	0	0	0	0
Gm28755	0	0	0	0	0	0
Gm45784	0	0	0	0	0	0
Crisp4	0	0	0	0	0	0
Defb44-ps	0	0	0	0	0	0
Defb18	0	0	0	0	0	0
Defb41	0	0	0	0	0	0
Gm17837	0	0	0	0	0	0
Gm29006	0	0	0	0	0	0
Gm5252	0	0	0	0	0	0
Gm28343	0	0	0	0	0	0
Gm28344	0	0	0	0	0	0
Gm15825	0	0	0	0	0	0
Tfap2d	0	0	0	0	0	0
Gm10075	0	0	0	0	0	0
Tfap2b	-1.08311	0.9999	0	0	21.4708	0.999982
Gm28341	0	0	0	0	0	0
Gm4849	0	0	0	0	0	0
Gm38382	0	0	0	0	0	0
Pkhd1	2.26855	0.162261	2.20116	0.04903	-1.74716	0.775541
Gm37315	0	0	0	0	0	0
4930486I03Rik	0	0	0	0	0	0
Gm15795	0	0	0	0	0	0
Il17a	5.16563	0.9999	0	0	2.51528	0.999982
Il17f	4.1052	0.9999	0	0	15.6387	0.999982
Mcm3	1.31662	0.9999	1.28319	0.999974	1.6676	0.836509
Gm20587	0	0	0	0	0	0
Paqr8	-2.64134	0.183337	-1.54263	0.999974	-1.4415	0.999982
Gm28064	0	0	0	0	0	0
Efhc1	-2.13083	0.997421	1.38288	0.999974	1.35499	0.999982
Tram2	-4.04861	0.000701321	-1.23994	0.999974	-1.35406	0.999982
Gm28287	0	0	0	0	0	0
Gm2693	0	0	0	0	0	0
Tmem14a	-2.63653	0.177378	-9.54566	0.000113275	-17.3513	1.49096e-08
Gm38224	0	0	0	0	0	0
Gsta3	-1.75206	0.950169	-19.5236	3.01228e-10	-23.5825	4.55573e-10
Gm28836	0	0	0	0	0	0
Gm7094	0	0	0	0	0	0
Gm4956	0	0	0	0	0	0
Gm21909	0	0	0	0	0	0
Khdc1a	18.0752	0.9999	1.95221	0.999974	2.50478	0.999982
Gm16329	0	0	0	0	0	0
Gm16327	0	0	0	0	0	0
Khdc1c	3.04576	0.9999	1.9526	0.999974	8.3477	0.999982
Gm2709	0	0	0	0	0	0
Gm16533	0	0	0	0	0	0
Khdc1b	4.10363	0.9999	1.95221	0.999974	21.4702	0.999982
Gm16328	0	0	0	0	0	0
Kcnq5	-2.16877	0.671904	-2.35897	0.582582	-1.66289	0.999982
Gm36949	0	0	0	0	0	0
Gm7658	0	0	0	0	0	0
Gm38243	0	0	0	0	0	0
Gm5696	0	0	0	0	0	0
Gm28239	0	0	0	0	0	0
Rims1	-3.02427	0.98737	-2.06287	0.999974	-1.3869	0.999982
Gm26866	0	0	0	0	0	0
Gm7761	0	0	0	0	0	0
Gm29506	0	0	0	0	0	0
4933415F23Rik	-1.08311	0.9999	0	0	9.80596	0.999982
Gm6420	0	0	0	0	0	0
Gm20954	0	0	0	0	0	0
Ogfrl1	-1.73604	0.512998	-1.35591	0.999974	-1.12815	0.999982
Gm7784	0	0	0	0	0	0
B3gat2	-203.511	0.000356777	-67.5196	0.0695886	1.29055	0.999982
Smap1	-1.57015	0.9999	1.52175	0.999974	-1.24868	0.999982
Sdhaf4	1.21288	0.9999	1.11728	0.999974	-1.22541	0.999982
Gm26524	0	0	0	0	0	0
Fam135a	1.24863	0.9999	1.70979	0.240096	1.60278	0.699448
Gm37580	0	0	0	0	0	0
Gm26607	0	0	0	0	0	0
Col9a1	3.04466	0.9999	0	0	2.51532	0.999982
Col19a1	-4.19092	0.990211	-4.06197	0.999974	-1.20654	0.999982
Tubb4b-ps2	0	0	0	0	0	0
Gm28439	0	0	0	0	0	0
Gm10222	0	0	0	0	0	0
Gm28438	0	0	0	0	0	0
Gm28437	0	0	0	0	0	0
Gm10925	0	0	0	0	0	0
Gm28661	0	0	0	0	0	0
Gm29216	0	0	0	0	0	0
Lmbrd1	-1.40579	0.857845	-1.78254	0.122519	1.04745	0.999982
Gm28594	0	0	0	0	0	0
Gm9443	0	0	0	0	0	0
Adgrb3	-1.08311	0.9999	0	0	6.88969	0.999982
Gm15702	0	0	0	0	0	0
Gm20172	0	0	0	0	0	0
Gm37543	0	0	0	0	0	0
Gm37331	0	0	0	0	0	0
Gm37211	0	0	0	0	0	0
Gm37862	0	0	0	0	0	0
Gm38286	0	0	0	0	0	0
Gm37880	0	0	0	0	0	0
Gm37011	0	0	0	0	0	0
Gm29214	0	0	0	0	0	0
Gm37051	0	0	0	0	0	0
Gm38260	0	0	0	0	0	0
Gm37628	0	0	0	0	0	0
8030445P17Rik	0	0	0	0	0	0
Gm38198	0	0	0	0	0	0
Gm37077	0	0	0	0	0	0
Gm37895	0	0	0	0	0	0
Gm36952	0	0	0	0	0	0
Gm37602	0	0	0	0	0	0
2900022M07Rik	0	0	0	0	0	0
2900002M20Rik	0	0	0	0	0	0
Gm9884	0	0	0	0	0	0
Gm18443	0	0	0	0	0	0
Gm19123	0	0	0	0	0	0
4931408C20Rik	-1.08311	0.9999	0	0	6.88961	0.999982
Gm19641	0	0	0	0	0	0
Gm18776	0	0	0	0	0	0
Gm19028	0	0	0	0	0	0
Gm38089	0	0	0	0	0	0
Gm7846	0	0	0	0	0	0
Gm597	-1.08311	0.9999	0	0	6.88948	0.999982
Gm5697	0	0	0	0	0	0
Gm6462	0	0	0	0	0	0
Gm18033	0	0	0	0	0	0
Gm5525	0	0	0	0	0	0
Gm7858	0	0	0	0	0	0
Gm6473	0	0	0	0	0	0
Gm2914	0	0	0	0	0	0
Phf3	1.18398	0.9999	-1.0779	0.999974	1.1102	0.999982
Gm37522	0	0	0	0	0	0
Gm37906	0	0	0	0	0	0
Ptp4a1	1.1666	0.9999	1.4599	0.999974	2.62592	0.258722
Gm5698	0	0	0	0	0	0
Gm9458	0	0	0	0	0	0
Gm5699	0	0	0	0	0	0
4931428L18Rik	-1.08311	0.9999	0	0	6.88965	0.999982
Gm29128	0	0	0	0	0	0
Gm7893	0	0	0	0	0	0
Lgsn	-1.08311	0.9999	0	0	3.97334	0.999982
Pih1d3	-1.08311	0.9999	0	0	5.43159	0.999982
Gm4850	0	0	0	0	0	0
Gm28645	0	0	0	0	0	0
Gm6489	0	0	0	0	0	0
Gm10307	0	0	0	0	0	0
Gm19680	0	0	0	0	0	0
Gm7910	0	0	0	0	0	0
Khdrbs2	-9.00337	0.671904	-4.06197	0.999974	1.35505	0.999982
Gm37999	0	0	0	0	0	0
Gm37110	0	0	0	0	0	0
Gm37911	0	0	0	0	0	0
Gm9839	0	0	0	0	0	0
Gm37792	0	0	0	0	0	0
Gm5415	3.0925	0.9999	-1.2252	0.999974	2.2449	0.999982
Gm37426	0	0	0	0	0	0
Gm37151	0	0	0	0	0	0
Gm28624	0	0	0	0	0	0
Gm7114	0	0	0	0	0	0
Gm4785	0	0	0	0	0	0
Gm2987	0	0	0	0	0	0
Gm18799	0	0	0	0	0	0
Gm7933	0	0	0	0	0	0
Prim2	-1.33891	0.9999	-1.2046	0.999974	1.04312	0.999982
Gm29228	0	0	0	0	0	0
Gm37618	0	0	0	0	0	0
Gm17813	0	0	0	0	0	0
1700001G17Rik	0	0	0	0	0	0
Gm38173	0	0	0	0	0	0
Rab23	-2.31435	0.0260046	-2.04716	0.0479606	-3.54736	7.94333e-05
Bag2	-2.11446	0.376363	-3.1889	0.0326611	-2.26086	0.366153
Gm37905	0	0	0	0	0	0
Zfp451	2.25232	0.251666	1.93066	0.122305	1.12739	0.999982
Gm15455	0	0	0	0	0	0
Bend6	1.15445	0.9999	-1.59166	0.999974	-2.01836	0.999982
Gm37067	0	0	0	0	0	0
Dst	2.26208	0.189544	2.31087	0.104351	2.2364	0.262293
Gm37354	0	0	0	0	0	0
Gm28631	0	0	0	0	0	0
Gm38157	0	0	0	0	0	0
A930005N03Rik	0	0	0	0	0	0
Gm37385	0	0	0	0	0	0
Gm5266	0	0	0	0	0	0
Gm3052	0	0	0	0	0	0
Ccdc115	-1.02814	0.9999	1.0162	0.999974	1.35374	0.999982
Gm28306	0	0	0	0	0	0
Imp4	1.38513	0.804551	1.09576	0.999974	1.27184	0.999982
Ptpn18	1.15339	0.9999	1.21488	0.999974	1.84027	0.999982
Prss39	-1.08311	0.9999	0	0	3.97334	0.999982
Gm28416	0	0	0	0	0	0
Cfc1	0	0	0	0	0	0
Gm28419	0	0	0	0	0	0
Prss40	-1.08311	0.9999	0	0	2.51532	0.999982
1700101I19Rik	0	0	0	0	0	0
Amer3	-1.08311	0.9999	0	0	12.7219	0.999982
Gm28418	0	0	0	0	0	0
Gm36984	0	0	0	0	0	0
Gm29730	0	0	0	0	0	0
AA619741	0	0	0	0	0	0
Arhgef4	-3.1964	0.413822	-1.83822	0.999974	1.00086	0.999982
Gm37224	0	0	0	0	0	0
Gm37845	0	0	0	0	0	0
Gm38336	0	0	0	0	0	0
Fam168b	-1.20473	0.9999	-1.26818	0.999974	1.22833	0.999982
Gm37127	0	0	0	0	0	0
Plekhb2	1.13765	0.9999	1.25118	0.999974	1.41627	0.999982
Gm19430	0	0	0	0	0	0
Gm37670	0	0	0	0	0	0
Gm8009	0	0	0	0	0	0
Gm38027	0	0	0	0	0	0
Gm8022	0	0	0	0	0	0
Gm38049	0	0	0	0	0	0
Hs6st1	-1.4083	0.9999	-1.57951	0.693694	-2.0247	0.440724
Gm37335	0	0	0	0	0	0
Uggt1	2.00423	0.223313	1.88397	0.232605	2.25721	0.127188
Neurl3	4.86109	3.47362e-06	2.08986	0.101157	-1.13858	0.999982
Arid5a	10.6848	1.78029e-06	8.609	1.52374e-06	8.17102	4.19603e-05
Kansl3	1.24709	0.9999	1.11404	0.999974	-1.29624	0.999982
Fer1l5	-81.6268	5.38043e-08	-102.711	0.0334247	-1.40128	0.999982
Lman2l	1.09356	0.9999	1.4106	0.867735	-1.85578	0.765329
Cnnm4	-1.01385	0.9999	1.07213	0.999974	-1.33522	0.999982
Gm37909	0	0	0	0	0	0
Cnnm3	-1.91308	0.0741565	-1.88029	0.0673097	-1.83802	0.137987
Gm38033	0	0	0	0	0	0
Ankrd23	4.12134	0.109794	8.15326	0.000147639	1.0643	0.999982
Gm42417	16.1819	0.345911	6.66944	0.622548	5.84769	0.999982
Ankrd39	2.64939	0.198586	3.24386	0.0175863	1.35468	0.999982
Sema4c	4.41264	1.00939e-05	5.00021	1.3255e-08	3.51017	0.00041324
Fam178b	9.40306	0.9999	5.95188	0.82888	25.8452	0.999982
Gm6428	0	0	0	0	0	0
Cox5b	-1.34552	0.9999	-2.45082	0.00904098	-1.45249	0.999982
Actr1b	1.35641	0.9999	1.26361	0.999974	1.11407	0.999982
4933424G06Rik	4.10355	0.9999	0	0	5.43141	0.999982
Zap70	-1.73128	0.586562	-3.21254	0.0137276	-2.44141	0.11373
Gm18828	0	0	0	0	0	0
Tmem131	-1.57313	0.522199	-1.18684	0.999974	-1.23872	0.999982
Gm37506	0	0	0	0	0	0
Gm38115	0	0	0	0	0	0
F830112A20Rik	0	0	0	0	0	0
Rpl12-ps1	0	0	0	0	0	0
Vwa3b	-1.7277	0.9999	4.13926	0.0336575	6.22725	0.00422618
Gm37020	0	0	0	0	0	0
Cnga3	-4.04279	0.9999	-1.2871	0.999974	1.73291	0.999982
1700074A21Rik	0	0	0	0	0	0
Inpp4a	1.91099	0.541021	4.15427	0.00026938	1.33361	0.999982
4930439A04Rik	0	0	0	0	0	0
Gm37135	0	0	0	0	0	0
Coa5	-2.2884	0.110621	-2.06015	0.084647	-1.35749	0.999982
Unc50	1.2213	0.9999	-1.49005	0.599523	1.1585	0.999982
Mgat4a	1.19258	0.9999	1.63562	0.526374	1.73618	0.551566
4930594C11Rik	0	0	0	0	0	0
Gm43213	0	0	0	0	0	0
2010300C02Rik	-2.1738	0.9999	-8.12506	0.104366	-1.78862	0.999982
4930556I23Rik	0	0	0	0	0	0
4930470B04Rik	0	0	0	0	0	0
Gm19863	0	0	0	0	0	0
Tsga10	1.36898	0.9999	1.26283	0.999974	-1.80871	0.999982
Gm26805	0	0	0	0	0	0
Lipt1	-1.35868	0.9999	-2.03191	0.107002	-1.83022	0.43439
Mitd1	3.8037	4.59414e-05	-1.0692	0.999974	-1.74472	0.430196
Mrpl30	1.40437	0.934335	-1.97858	0.0906865	-1.07577	0.999982
Lyg2	-1.08311	0.9999	0	0	12.7217	0.999982
Gm15457	0	0	0	0	0	0
Lyg1	-1.08311	0.9999	0	0	2.51527	0.999982
Txndc9	1.27493	0.9999	1.07087	0.999974	-1.00394	0.999982
Eif5b	-1.80701	0.339212	-1.54231	0.560153	-1.90898	0.320247
Rev1	6.17407	7.67446e-07	2.32409	0.0187798	-1.02503	0.999982
Gm37062	0	0	0	0	0	0
Aff3	-1.9202	0.61686	-2.06388	0.495427	-1.47546	0.999982
Gm16150	0	0	0	0	0	0
Gm16151	0	0	0	0	0	0
Gm16152	0	0	0	0	0	0
Gm34727	0	0	0	0	0	0
Gm38135	0	0	0	0	0	0
2610300A13Rik	0	0	0	0	0	0
Lonrf2	-2.02297	0.9999	-1.28726	0.999974	1.3559	0.999982
Chst10	1.42273	0.9999	2.14029	0.999974	1.66617	0.999982
Gm37707	0	0	0	0	0	0
Gm6621	0	0	0	0	0	0
Nms	-1.08311	0.9999	0	0	3.9734	0.999982
Pdcl3	-1.53474	0.767902	-1.51	0.688982	1.052	0.999982
Gm37309	0	0	0	0	0	0
Gm37091	0	0	0	0	0	0
Npas2	-15.9496	1.78871e-08	2.08425	0.236765	1.75077	0.999982
Gm20428	0	0	0	0	0	0
Gm3617	0	0	0	0	0	0
Rpl31	1.13737	0.9999	1.22397	0.999974	1.17715	0.999982
Tbc1d8	2.27742	0.0540789	2.39205	0.0126765	2.16114	0.10485
Gm37265	0	0	0	0	0	0
Cnot11	1.13709	0.9999	-1.14648	0.999974	1.01993	0.999982
Rnf149	-1.43108	0.9999	1.03827	0.999974	2.29901	0.122711
Gm5100	0	0	0	0	0	0
Creg2	7.28314	0.9999	7.28702	0.723916	55.0063	0.975645
D930019O06Rik	0	0	0	0	0	0
Rfx8	-2.99419	0.9999	1.30653	0.999974	1.56283	0.999982
Gm3646	-1.08311	0.9999	0	0	2.51527	0.999982
Map4k4	1.19579	0.9999	2.28044	0.0118146	2.23618	0.0331018
4930456G14Rik	0	0	0	0	0	0
Il1r2	37.4036	0.0144006	116.058	1.39605e-05	624.312	1.27847e-07
Gm16894	0	0	0	0	0	0
Gm37347	0	0	0	0	0	0
Il1r1	8.32425	1.81055e-07	21.4907	0	17.1847	1.91861e-13
Gm38070	0	0	0	0	0	0
Il1rl2	-1.201	0.9999	1.36262	0.999974	1.96896	0.958138
Gm17970	0	0	0	0	0	0
Il1rl1	76.8816	0.655776	9.95245	0.468429	49.179	0.999982
Il18r1	3.87886	0.110817	6.39401	0.00689044	7.08419	0.00500605
Il18rap	10.7469	8.02234e-05	11.357	6.74713e-06	10.6558	8.47208e-05
Gm35801	0	0	0	0	0	0
Slc9a4	1.98346	0.9999	3.2858	0.999974	20.0122	0.999982
Gm37435	0	0	0	0	0	0
Slc9a2	2.15274	0.9999	-4.05964	0.999974	3.46216	0.999982
Gm37623	0	0	0	0	0	0
Gm37915	0	0	0	0	0	0
Mfsd9	-1.61768	0.9999	-1.93845	0.43825	-1.29594	0.999982
Tmem182	4.10379	0.9999	0	0	3.97334	0.999982
Gm5973	0	0	0	0	0	0
Gm5267	0	0	0	0	0	0
Gm8176	0	0	0	0	0	0
Gm37047	0	0	0	0	0	0
4930420N18Rik	0	0	0	0	0	0
Gm20646	0	0	0	0	0	0
Pou3f3	3.03306	0.9999	1.95227	0.999974	17.0846	0.999982
Mrps9	1.00113	0.9999	-1.66768	0.404753	-1.25004	0.999982
Gpr45	-1.08311	0.9999	0	0	11.2637	0.999982
Tgfbrap1	-1.35261	0.92288	-1.22956	0.999974	-1.09337	0.999982
Gm28782	0	0	0	0	0	0
8430432A02Rik	0	0	0	0	0	0
AI597479	1.17675	0.9999	1.01355	0.999974	1.07705	0.999982
Fhl2	3.53988	0.136406	-1.25336	0.999974	1.06456	0.999982
Gm8210	0	0	0	0	0	0
Gm29610	0	0	0	0	0	0
Gm29041	0	0	0	0	0	0
Nck2	1.68411	0.628473	1.59647	0.711967	1.22991	0.999982
Gm37536	0	0	0	0	0	0
Gm38228	0	0	0	0	0	0
1500015O10Rik	-1.66044	0.9999	-1.22491	0.999974	-2.87451	0.999982
Gm29155	0	0	0	0	0	0
Uxs1	-1.36629	0.9999	-1.15337	0.999974	-1.29362	0.999982
Gm16103	0	0	0	0	0	0
Gm19587	0	0	0	0	0	0
Gm8241	0	0	0	0	0	0
Tpp2	1.73584	0.287546	1.23576	0.999974	1.21489	0.999982
Mettl21c	-2.70937	0.9999	-4.05964	0.999974	3.88375	0.999982
Gm15838	0	0	0	0	0	0
Gm8251	3.61129	0.814029	1.07434	0.999974	1.1047	0.999982
Tex30	-1.41267	0.9999	-2.00393	0.649008	1.02984	0.999982
Kdelc1	1.50083	0.686622	2.3413	0.013048	1.17552	0.999982
Bivm	-1.98635	0.163271	-1.48089	0.760543	-1.54172	0.900245
Ercc5	2.15197	0.0545264	-1.1233	0.999974	-1.17897	0.999982
Mettl21e	-9.92638	0.125409	-2.14691	0.999974	-5.56621	0.44095
Gm15833	0	0	0	0	0	0
Gm5700	0	0	0	0	0	0
Txn-ps1	0	0	0	0	0	0
Gulp1	-4.85081	0.0152731	-1.54966	0.999974	-2.4474	0.466467
Gm37626	0	0	0	0	0	0
Gm16102	0	0	0	0	0	0
4930521E06Rik	0	0	0	0	0	0
Gm38110	0	0	0	0	0	0
Gm3489	0	0	0	0	0	0
Gm19480	0	0	0	0	0	0
Gm3496	0	0	0	0	0	0
Gm5268	0	0	0	0	0	0
Col3a1	1.23816	0.9999	1.40624	0.999974	1.23262	0.999982
Col5a2	1.58394	0.734327	1.88284	0.143701	2.37582	0.101319
Gm38211	0	0	0	0	0	0
Gm8296	0	0	0	0	0	0
Gm7063	0	0	0	0	0	0
Gm8304	0	0	0	0	0	0
Gm8307	0	0	0	0	0	0
Gm23984	0	0	0	0	0	0
Wdr75	1.29903	0.9999	-1.0583	0.999974	1.68478	0.360236
Gm28906	0	0	0	0	0	0
Gm5526	0	0	0	0	0	0
Gm5269	0	0	0	0	0	0
Gm18303	0	0	0	0	0	0
Slc40a1	-7.09622	6.52399e-09	-3.09697	0.00116393	-2.48656	0.0453935
Gm9496	0	0	0	0	0	0
Rpl23a-ps1	0	0	0	0	0	0
Gm3852	0	0	0	0	0	0
Stk-ps2	0	0	0	0	0	0
Gm18849	0	0	0	0	0	0
Dnah7b	1.73211	0.9999	2.26024	0.661888	-1.69384	0.999982
Gm8326	0	0	0	0	0	0
Dnah7c	-1.3512	0.9999	-1.28793	0.999974	2.55977	0.999982
Slc39a10	2.14732	0.229589	1.99712	0.325414	2.76942	0.0530845
Gm37393	0	0	0	0	0	0
Gm28527	0	0	0	0	0	0
Gm28825	0	0	0	0	0	0
Gm4852	0	0	0	0	0	0
Gm38090	0	0	0	0	0	0
Gm18117	0	0	0	0	0	0
Gm37196	0	0	0	0	0	0
Gm8337	0	0	0	0	0	0
Gm19206	0	0	0	0	0	0
Gm5974	0	0	0	0	0	0
Gm28830	0	0	0	0	0	0
Gm8354	0	0	0	0	0	0
Gm19124	0	0	0	0	0	0
Gm8357	0	0	0	0	0	0
Gm28740	0	0	0	0	0	0
Gm8367	0	0	0	0	0	0
Gm6757	0	0	0	0	0	0
Gm3605	0	0	0	0	0	0
Gm28388	0	0	0	0	0	0
Gm8384	0	0	0	0	0	0
Gm8391	0	0	0	0	0	0
Gm20118	0	0	0	0	0	0
Tmeff2	-5.36999	0.166087	-5.16152	0.500445	-2.86704	0.8297
Gm28319	0	0	0	0	0	0
Gm28320	0	0	0	0	0	0
9330175M20Rik	0	0	0	0	0	0
Sdpr	-3.34017	0.00230592	-1.64572	0.232361	-2.45456	0.0577681
Gm5253	0	0	0	0	0	0
Nabp1	2.1092	0.0998658	1.4451	0.748812	-1.08589	0.999982
Gm37535	0	0	0	0	0	0
Myo1b	-1.8694	0.4262	-1.1864	0.999974	-1.45984	0.999982
Gm29453	0	0	0	0	0	0
Gm28323	0	0	0	0	0	0
Gm8419	0	0	0	0	0	0
Gm8420	0	0	0	0	0	0
Stat4	2.37171	0.345702	-1.00338	0.999974	-1.1788	0.999982
Gm3940	0	0	0	0	0	0
Stat1	20.342	0	2.15052	0.114714	-1.30588	0.999982
Gm18301	0	0	0	0	0	0
Gls	2.80106	0.00436537	1.8061	0.188521	2.17256	0.0770933
Gm5975	0	0	0	0	0	0
Nab1	1.22713	0.9999	-1.72269	0.247195	1.52593	0.999982
Gm5976	0	0	0	0	0	0
Rps27a-ps1	0	0	0	0	0	0
Gm5527	0	0	0	0	0	0
Nemp2	2.283	0.370768	2.23338	0.334446	1.68637	0.999982
Gm37242	0	0	0	0	0	0
Mfsd6	1.14587	0.9999	-1.10327	0.999974	2.11697	0.0505593
Gm29670	0	0	0	0	0	0
Gm28650	0	0	0	0	0	0
Inpp1	5.38535	7.2791e-08	1.08892	0.999974	-1.35476	0.999982
Hibch	-2.66739	0.0857609	-2.98406	0.0144677	-3.71578	0.00803564
Gm16107	0	0	0	0	0	0
1700019D03Rik	-10.4063	0.00718155	-9.07682	0.0513164	-7.11996	0.0365193
Mstn	-1.08311	0.9999	0	0	8.34781	0.999982
1700019A02Rik	13.0909	0.9999	3.28555	0.999974	2.5122	0.999982
Pms1	1.14762	0.9999	-1.49792	0.675643	-2.18914	0.102997
Gm28777	0	0	0	0	0	0
Ormdl1	-2.57179	0.0896621	-4.83316	5.48683e-05	-3.45379	0.0109513
Gm28778	-2.03151	0.9999	-9.33757	0.260647	1.3423	0.999982
Osgepl1	-1.61176	0.595043	-2.29274	0.0434669	-1.44298	0.999982
Gm28551	0	0	0	0	0	0
Gm18800	0	0	0	0	0	0
Asnsd1	-2.12894	0.186344	-1.61258	0.644122	-1.02263	0.999982
Gm28779	0	0	0	0	0	0
Gm6799	0	0	0	0	0	0
Gm6801	0	0	0	0	0	0
Dnah7a	-1.08324	0.9999	0	0	11.2647	0.999982
Stk17b	1.33728	0.9999	1.99427	0.104945	3.04216	0.00236409
Gm37863	0	0	0	0	0	0
Hecw2	1.54714	0.704394	2.47436	0.00498682	1.95156	0.273651
Gm37633	0	0	0	0	0	0
Ccdc150	4.10371	0.9999	0	0	9.80602	0.999982
Gtf3c3	1.14016	0.9999	-1.51952	0.458477	-1.09574	0.999982
Pgap1	-4.24298	1.58014e-06	-1.41768	0.760543	-1.08368	0.999982
Gm36955	0	0	0	0	0	0
Gm19637	0	0	0	0	0	0
Ankrd44	-1.20291	0.9999	1.71856	0.223544	1.06427	0.999982
4930444A19Rik	0	0	0	0	0	0
Gm37370	0	0	0	0	0	0
A130048G24Rik	0	0	0	0	0	0
Sf3b1	1.43916	0.95777	1.06274	0.999974	1.40946	0.999982
E330011M16Rik	0	0	0	0	0	0
Coq10b	1.76383	0.281091	-2.33547	0.0224585	1.56075	0.749858
Gm17971	0	0	0	0	0	0
Hspd1	-1.67603	0.976292	-2.42852	0.163097	-1.428	0.999982
Hspe1	-2.67013	0.00618212	-5.13779	3.33086e-09	-1.82922	0.28555
Gm5147	0	0	0	0	0	0
Gm16581	0	0	0	0	0	0
Mob4	-1.29918	0.9999	-1.3204	0.999974	-1.10631	0.999982
Gm6822	0	0	0	0	0	0
Rftn2	-2.90515	0.100601	-1.20728	0.999974	-1.64367	0.999982
Gm10561	0	0	0	0	0	0
Mars2	1.11326	0.9999	1.59994	0.508492	1.39285	0.999982
Boll	3.01901	0.9999	0	0	14.1671	0.999982
Gm8292	0	0	0	0	0	0
Gm29138	0	0	0	0	0	0
Gm8531	0	0	0	0	0	0
Plcl1	-1.8433	0.671904	2.23224	0.241047	4.64478	0.00235299
Gm38056	0	0	0	0	0	0
Gm6644	0	0	0	0	0	0
Gm37382	0	0	0	0	0	0
Gm36986	0	0	0	0	0	0
Gm28900	0	0	0	0	0	0
Hsfy2	-1.08311	0.9999	0	0	2.51528	0.999982
Satb2	2.39131	0.605452	4.55319	0.0160131	2.51989	0.684296
Gm4081	0	0	0	0	0	0
Gm5254	0	0	0	0	0	0
1700066M21Rik	-2.48724	0.0505212	-2.00474	0.203316	-1.6894	0.723843
Tyw5	-1.78281	0.305793	-2.28875	0.0400799	-1.4964	0.974849
Maip1	-1.0438	0.9999	-1.94407	0.0692217	-1.45333	0.999982
Gm8581	0	0	0	0	0	0
Gm37373	0	0	0	0	0	0
Gm17929	0	0	0	0	0	0
Spats2l	46.2185	0	3.0232	0.00832756	1.9824	0.401817
Gm17234	0	0	0	0	0	0
Kctd18	1.7023	0.578018	1.91396	0.231549	1.67099	0.809405
Sgol2a	-1.61619	0.9999	-3.14306	0.363157	-1.08942	0.999982
Aox1	-1.43298	0.717276	-1.8753	0.100977	-3.28236	6.26808e-05
Aox3	-2.5594	0.319399	-7.41208	2.38304e-05	-118.483	0
Aox4	-1.96037	0.9999	-4.05964	0.999974	1.82258	0.999982
Gm15759	0	0	0	0	0	0
Aox2	-1.69218	0.9999	-4.68136	0.701166	-1.10878	0.999982
Gm37607	0	0	0	0	0	0
Bzw1	-1.13655	0.9999	-1.54766	0.698591	1.19957	0.999982
Clk1	1.77744	0.382907	1.00255	0.999974	-1.74777	0.550846
Ppil3	1.1412	0.9999	-1.51985	0.71779	-1.46168	0.999982
Nif3l1	1.91618	0.36884	1.10876	0.999974	1.3494	0.999982
Orc2	1.38028	0.9999	1.35366	0.999974	1.42632	0.999982
Fam126b	-1.65097	0.452202	-1.26842	0.999974	-1.11375	0.999982
Ndufb3	-2.68858	0.0106727	-4.14342	1.67482e-06	-1.35413	0.999982
Gm29389	0	0	0	0	0	0
Gm18802	0	0	0	0	0	0
Cbx3-ps7	0	0	0	0	0	0
Als2cr12	-4.52306	0.148774	-18.718	0.372621	-6.24506	0.103046
Gm20257	0	0	0	0	0	0
Gm28803	0	0	0	0	0	0
Cflar	2.42073	0.0601805	1.56656	0.668361	-1.1036	0.999982
Gm3841	0	0	0	0	0	0
Casp8	2.24869	0.0355355	-1.15687	0.999974	1.46214	0.987927
Gm37760	0	0	0	0	0	0
Gm28802	0	0	0	0	0	0
Trak2	1.17969	0.9999	1.49477	0.50579	1.59539	0.577556
Stradb	-2.52649	0.00884087	-2.95269	0.000459813	-4.41214	9.96144e-07
Gm29018	0	0	0	0	0	0
Als2cr11	1.98346	0.9999	0	0	2.51532	0.999982
Tmem237	-1.31674	0.9999	1.04286	0.999974	1.36202	0.999982
G730003C15Rik	0	0	0	0	0	0
Mpp4	2.96245	0.671904	1.89026	0.999974	-1.92761	0.999982
Gm29017	0	0	0	0	0	0
Gm19125	0	0	0	0	0	0
Als2	-1.18175	0.9999	-1.16239	0.999974	-2.4374	0.0568293
Cdk15	-1.59268	0.9999	-2.06203	0.999974	-1.49721	0.999982
Gm37737	0	0	0	0	0	0
Fzd7	-2.97399	0.000613268	-2.03387	0.0346898	-2.94992	0.000734295
Gm973	6.58445	0.9999	0	0	19.9806	0.999982
Gm28411	0	0	0	0	0	0
1700122D07Rik	0	0	0	0	0	0
Sumo1	1.14669	0.9999	-1.55815	0.883715	-1.47697	0.999982
D430013B06Rik	0	0	0	0	0	0
Gm29596	0	0	0	0	0	0
Nop58	2.22202	0.0773032	2.39505	0.0163972	2.57911	0.0241063
Bmpr2	-1.18451	0.9999	1.15992	0.999974	2.03169	0.199874
Gm38125	0	0	0	0	0	0
Gm37977	0	0	0	0	0	0
Fam117b	-1.46366	0.738277	1.308	0.999974	1.18947	0.999982
Gm37531	0	0	0	0	0	0
Gm18829	0	0	0	0	0	0
Ica1l	-1.03661	0.9999	-6.50676	0.990624	3.43957	0.999982
Wdr12	1.08314	0.9999	-1.08235	0.999974	1.08043	0.999982
Carf	1.52733	0.9999	1.98803	0.170089	1.08028	0.999982
Gm15464	0	0	0	0	0	0
Nbeal1	1.28913	0.9999	1.94588	0.225179	1.94581	0.738814
Gm29332	0	0	0	0	0	0
Cyp20a1	-1.44451	0.904845	-1.64462	0.409	1.33759	0.999982
6030460B20Rik	0	0	0	0	0	0
Abi2	-3.91118	0.000114459	-2.74994	0.00314084	-1.02347	0.999982
Raph1	5.63528	0.000922317	5.1331	8.23671e-05	4.17332	0.0126906
Gm11575	0	0	0	0	0	0
Gm11576	0	0	0	0	0	0
Gm11578	0	0	0	0	0	0
Gm38388	0	0	0	0	0	0
Gm11577	0	0	0	0	0	0
Eif4a-ps4	0	0	0	0	0	0
Cd28	1.18621	0.9999	37.545	9.29011e-13	119.702	0
Gm37198	0	0	0	0	0	0
Gm11609	0	0	0	0	0	0
Gm11581	0	0	0	0	0	0
Gm38137	0	0	0	0	0	0
Ctla4	11.5265	0.9999	5.95113	0.873153	53.5448	0.988841
Rpl18-ps1	0	0	0	0	0	0
Gm11582	0	0	0	0	0	0
Icos	-3.01694	0.0725342	-2.34791	0.310277	-2.94671	0.102369
Gm37039	0	0	0	0	0	0
Rpl17-ps1	0	0	0	0	0	0
Gm11590	0	0	0	0	0	0
Gm11591	0	0	0	0	0	0
Gm36943	0	0	0	0	0	0
Gm28094	0	0	0	0	0	0
Pard3b	1.33893	0.9999	1.22004	0.999974	-1.16165	0.999982
Gm37205	0	0	0	0	0	0
Gm38012	0	0	0	0	0	0
Gm38278	0	0	0	0	0	0
Pard3bos1	0	0	0	0	0	0
Gm38075	0	0	0	0	0	0
Gm29640	0	0	0	0	0	0
Gm29641	0	0	0	0	0	0
Pard3bos2	0	0	0	0	0	0
Gm38351	0	0	0	0	0	0
Pard3bos3	0	0	0	0	0	0
Gm29084	0	0	0	0	0	0
Gm11600	0	0	0	0	0	0
Gm11599	0	0	0	0	0	0
Nrp2	1.61928	0.474438	2.29705	0.0137483	1.72436	0.428667
Gm29083	0	0	0	0	0	0
Gm37121	0	0	0	0	0	0
Ino80d	2.09663	0.222636	1.82123	0.153112	1.15155	0.999982
Rps13-ps7	0	0	0	0	0	0
Rps27-ps1	0	0	0	0	0	0
Ndufs1	-1.22037	0.9999	-2.21463	0.0347872	-1.56149	0.999982
Eef1b2	-1.3226	0.9999	-1.71805	0.176424	1.51231	0.999982
Gpr1	7.28356	0.9999	3.29749	0.999974	20.0125	0.999982
1700039I01Rik	0	0	0	0	0	0
Zdbf2	-1.60772	0.9999	1.83805	0.999974	6.44529	0.675681
Gm11606	0	0	0	0	0	0
Gm11605	0	0	0	0	0	0
Adam23	-1.81236	0.171549	1.77529	0.119577	1.97543	0.10083
Dytn	-1.08311	0.9999	0	0	3.97342	0.999982
Gm12748	0	0	0	0	0	0
Mdh1b	3.04367	0.9999	0	0	5.43141	0.999982
Fastkd2	1.03783	0.9999	-1.42006	0.765402	-1.37328	0.999982
4933402D24Rik	-56.5392	0.0150671	-18.7419	0.371342	-3.33808	0.42223
Gm13751	0	0	0	0	0	0
Gm13754	0	0	0	0	0	0
Klf7	1.04203	0.9999	1.27375	0.999974	1.18119	0.999982
Gm13748	0	0	0	0	0	0
Gm13750	0	0	0	0	0	0
Gm28980	0	0	0	0	0	0
Creb1	-1.08509	0.9999	1.07711	0.999974	-1.04792	0.999982
Mettl21a	1.44392	0.88173	1.11253	0.999974	1.06955	0.999982
Ccnyl1	5.49236	1.37077e-05	2.06552	0.0721124	1.60139	0.999982
Fzd5	-1.10709	0.9999	-1.06012	0.999974	-1.7452	0.260711
Gm38058	0	0	0	0	0	0
Plekhm3	2.43441	0.0412031	4.13376	3.17256e-06	2.67992	0.0191472
Rpl31-ps24	0	0	0	0	0	0
Rpl10a-ps1	0	0	0	0	0	0
Akr1cl	0	0	0	0	0	0
Gm8550	0	0	0	0	0	0
Cryge	-1.08311	0.9999	0	0	2.51527	0.999982
Crygd	-1.08311	0.9999	0	0	6.88952	0.999982
Crygc	-1.08311	0.9999	0	0	2.51527	0.999982
Crygb	0	0	0	0	0	0
Gm7329	0	0	0	0	0	0
Cryga	-1.08311	0.9999	0	0	8.34763	0.999982
Gm28845	1.98346	0.9999	0	0	1.05719	0.999982
D630023F18Rik	-1.60827	0.9999	1.30758	0.999974	1.0048	0.999982
Idh1	-1.81916	0.687497	-4.47294	0.000440158	-2.89635	0.114672
Pikfyve	2.50435	0.0264866	1.6903	0.202708	1.22114	0.999982
Pth2r	1.98418	0.9999	4.62011	0.999974	14.1799	0.999982
Gm28927	0	0	0	0	0	0
Gm28926	0	0	0	0	0	0
Gm28925	0	0	0	0	0	0
Gm28923	0	0	0	0	0	0
Gm28922	0	0	0	0	0	0
Gm28728	0	0	0	0	0	0
Gm5255	0	0	0	0	0	0
Gm8805	0	0	0	0	0	0
Crygf	-1.08311	0.9999	0	0	2.51532	0.999982
Gm8809	0	0	0	0	0	0
Gm15659	0	0	0	0	0	0
Gm8812	0	0	0	0	0	0
Map2	-1.45736	0.9999	-2.04225	0.388565	-2.56507	0.174806
Gm10558	0	0	0	0	0	0
Unc80	-1.14141	0.9999	-4.06224	0.999974	1.7058	0.999982
Gm37181	0	0	0	0	0	0
Rpe	1.00853	0.9999	-1.03473	0.999974	-1.29059	0.999982
Kansl1l	1.54622	0.574883	-1.28947	0.999974	-1.99049	0.129364
Gm37570	0	0	0	0	0	0
Gm38387	0	0	0	0	0	0
Gm38162	0	0	0	0	0	0
Gm15789	0	0	0	0	0	0
6820402A03Rik	0	0	0	0	0	0
Gm37285	0	0	0	0	0	0
Gm37755	0	0	0	0	0	0
Gm38218	0	0	0	0	0	0
Acadl	-1.81118	0.564622	-3.22027	0.000695794	-2.06479	0.416898
Gm15793	0	0	0	0	0	0
Myl1	-8.63984	0.792465	-4.05964	0.999974	-1.14218	0.999982
Rpl31-ps14	0	0	0	0	0	0
Gm15826	0	0	0	0	0	0
Lancl1	-1.50191	0.589202	-1.3412	0.974146	1.08304	0.999982
Cps1	-1.44702	0.9999	-1.98212	0.35297	-1.6988	0.999982
Kif22-ps	0	0	0	0	0	0
Gm37957	0	0	0	0	0	0
Erbb4	-3.54661	0.00670233	-8.75396	2.76399e-07	-10.0691	7.83052e-09
Gm37100	0	0	0	0	0	0
Gm15670	0	0	0	0	0	0
Gm19335	0	0	0	0	0	0
Gm37735	0	0	0	0	0	0
Gm37769	0	0	0	0	0	0
Gm37061	0	0	0	0	0	0
Gm16076	0	0	0	0	0	0
Gm8840	0	0	0	0	0	0
Pced1c-ps	0	0	0	0	0	0
Gm29114	0	0	0	0	0	0
Ikzf2	2.16532	0.494513	2.77172	0.0723146	-1.41162	0.999982
Gm29112	0	0	0	0	0	0
Gm28112	0	0	0	0	0	0
Gm37930	0	0	0	0	0	0
Spag16	-1.08311	0.9999	1.95251	0.999974	9.80559	0.999982
Gm28580	0	0	0	0	0	0
Gm38272	0	0	0	0	0	0
Gm37456	0	0	0	0	0	0
Vwc2l	-1.08311	0.9999	0	0	14.1803	0.999982
Bard1	1.74028	0.956481	1.45298	0.999974	1.15338	0.999982
Gm16236	0	0	0	0	0	0
Gm8870	0	0	0	0	0	0
Abca12	-4.18941	0.9999	1.30246	0.999974	1.70585	0.999982
Gm6947	0	0	0	0	0	0
Atic	1.12122	0.9999	-1.47074	0.623137	-1.14553	0.999982
Fn1	1.2717	0.9999	2.26871	0.174781	3.07373	0.0301612
Apol7d	0	0	0	0	0	0
Gm5829	0	0	0	0	0	0
Gm5256	0	0	0	0	0	0
Gm37217	0	0	0	0	0	0
Gm5528	0	0	0	0	0	0
Gm8885	0	0	0	0	0	0
Mreg	-6.36994	3.58139e-06	-4.02343	0.00014762	-5.27313	5.34062e-05
Pecr	-1.53805	0.87199	-4.25866	1.21596e-06	-10.6182	1.14624e-10
Tmem169	9.46703	0.00100125	-1.03065	0.999974	-2.12489	0.999982
Xrcc5	1.16464	0.9999	1.68282	0.422315	1.43088	0.999982
March4	1.98346	0.9999	0	0	12.7218	0.999982
Gm15843	0	0	0	0	0	0
Smarcal1	-1.04623	0.9999	-1.16485	0.999974	-1.68692	0.414527
Gm45835	0	0	0	0	0	0
Ankar	-1.08311	0.9999	0	0	8.34775	0.999982
Gm18035	0	0	0	0	0	0
Gm45859	0	0	0	0	0	0
Rpl37a	-1.83341	0.334175	-1.69115	0.26945	1.57784	0.898292
Igfbp2	-1.20789	0.9999	-11.4111	3.70185e-11	-7.77194	0.00016712
Igfbp5	-6.95431	2.73089e-10	-5.88172	3.28119e-10	-1.74012	0.434894
1700027A15Rik	0	0	0	0	0	0
Tnp1	0	0	0	0	0	0
Gm38106	0	0	0	0	0	0
Gm29184	0	0	0	0	0	0
Gm9553	0	0	0	0	0	0
Tns1	-1.77043	0.506593	1.62412	0.618755	1.05558	0.999982
Rufy4	1.1269	0.9999	1.33202	0.999974	1.92928	0.999982
Cxcr2	52.6386	0.00362351	62.1129	0.000128024	157.801	5.14327e-05
Cxcr1	3.99655	0.949286	-1.28784	0.999974	4.20426	0.999982
Arpc2	-1.71927	0.403294	-2.5796	0.000962948	-1.06401	0.999982
Gpbar1	-32.7872	0.0836887	-2.76694	0.999974	1.2873	0.999982
Aamp	1.03505	0.9999	-1.24242	0.999974	1.12778	0.999982
Gm28364	0	0	0	0	0	0
Pnkd	-4.31089	7.0127e-05	-2.77415	0.00267362	-2.9567	0.00893464
Gm37503	0	0	0	0	0	0
Tmbim1	1.21536	0.9999	1.03612	0.999974	1.06831	0.999982
Gm29358	0	0	0	0	0	0
Gm37931	0	0	0	0	0	0
Catip	13.6412	0.9999	4.61827	0.999974	22.9293	0.999982
Slc11a1	2.2819	0.0405184	3.12773	0.000345958	4.43511	3.21922e-06
Ctdsp1	-1.69089	0.499271	-1.8718	0.109259	-1.44168	0.999982
Vil1	-1.17348	0.9999	-2.47193	0.660316	-2.5949	0.567276
Usp37	2.00014	0.0768772	1.88963	0.0577621	1.52312	0.744389
Gm37733	0	0	0	0	0	0
Cnot9	1.05773	0.9999	1.04065	0.999974	1.15839	0.999982
Plcd4	-48.5322	0.0317206	-5.15778	0.544615	-2.23904	0.999982
Zfp142	2.29149	0.141685	2.26117	0.0432719	-1.09418	0.999982
Bcs1l	-1.30188	0.9999	-1.45467	0.918383	-1.26961	0.999982
Rnf25	1.94857	0.13837	1.29843	0.999974	1.35833	0.999982
Stk36	2.47564	0.395913	2.54602	0.26716	1.38626	0.999982
Ttll4	2.76083	0.0478794	2.42599	0.013863	1.39836	0.999982
Cyp27a1	-1.10125	0.9999	-2.40454	0.0553426	-4.28388	0.00041943
Prkag3	-1.90114	0.9999	-7.31866	0.0863262	-6.52416	0.314277
Wnt6	1.515	0.9999	-4.05964	0.999974	3.11114	0.999982
Gm29539	0	0	0	0	0	0
Wnt10a	-1.32844	0.9999	-4.06197	0.999974	6.98824	0.64287
Cdk5r2	-1.08311	0.9999	0	0	9.80591	0.999982
Fev	-7.87143	0.38283	-2.06177	0.999974	-2.26616	0.999982
Cryba2	-1.08311	0.9999	0	0	2.51532	0.999982
Cfap65	-9.0837	0.723691	-1.28784	0.999974	2.0399	0.999982
Gm15841	0	0	0	0	0	0
Ihh	-8.07429	2.58822e-05	-2.99112	0.085401	-6.89671	0.00011998
Gm37744	0	0	0	0	0	0
Nhej1	1.09514	0.9999	1.04958	0.999974	1.00285	0.999982
Slc23a3	3.68215	0.69888	4.12507	0.459143	3.95468	0.835178
Cnppd1	1.06095	0.9999	1.0985	0.999974	-1.09248	0.999982
Fam134a	-1.69701	0.626853	-1.97845	0.145318	-1.27856	0.999982
Zfand2b	1.02796	0.9999	-1.15427	0.999974	-1.24344	0.999982
Abcb6	-2.00646	0.139579	-4.56639	3.8101e-08	-2.35337	0.0445101
Atg9a	-1.27384	0.9999	-1.05375	0.999974	-1.11023	0.999982
Ankzf1	2.01286	0.206443	1.73857	0.245452	1.00556	0.999982
Glb1l	1.69507	0.80972	1.77998	0.572514	1.30436	0.999982
Stk16	-1.18683	0.9999	-1.32211	0.999974	-1.77657	0.436979
Tuba4a	-1.90168	0.439621	-2.39344	0.0378632	-1.18083	0.999982
A630095N17Rik	-7.53896	0.266643	-8.9507	0.760543	-1.61769	0.999982
Dnajb2	1.47719	0.720229	-1.19473	0.999974	-1.74751	0.387616
Ptprn	-7.19093	0.236858	-1.43917	0.999974	4.47294	0.449311
Gm28294	0	0	0	0	0	0
Resp18	0	0	0	0	0	0
Gm28902	0	0	0	0	0	0
Dnpep	1.29503	0.9999	-1.0458	0.999974	1.07938	0.999982
Des	1.14505	0.9999	1.24336	0.999974	2.37161	0.147866
Gm15179	0	0	0	0	0	0
Speg	1.59095	0.9999	3.54837	0.0653654	1.51701	0.999982
Gm15178	0	0	0	0	0	0
Gmppa	5.36604	2.37705e-05	3.84215	0.00030957	1.40587	0.999982
Asic4	-182.052	0.00362786	-56.7311	0.135064	-8.31248	0.150232
Gm37264	0	0	0	0	0	0
Chpf	1.15483	0.9999	2.12553	0.227205	3.93647	0.000796966
Obsl1	1.08451	0.9999	1.29282	0.999974	-1.0988	0.999982
Tmem198	1.22655	0.9999	7.31045	0.345605	4.80491	0.999982
Inha	15.0597	0.9999	15.2806	0.286635	12.718	0.999982
Gm15181	0	0	0	0	0	0
Stk11ip	1.24025	0.9999	2.23809	0.0162974	1.17379	0.999982
Gm15183	0	0	0	0	0	0
Slc4a3	2.62925	0.447866	4.69686	0.0112479	1.43729	0.999982
Gm15180	0	0	0	0	0	0
Gm15182	0	0	0	0	0	0
Gm5257	0	0	0	0	0	0
Gm29068	0	0	0	0	0	0
Gm38265	0	0	0	0	0	0
Epha4	2.42375	0.319281	2.51086	0.311527	3.43263	0.0726156
Gm28385	0	0	0	0	0	0
Pax3	1.98418	0.9999	3.28539	0.999974	12.7218	0.999982
Sgpp2	-1.2791	0.9999	-2.41538	0.415845	-1.6561	0.999982
Gm28410	0	0	0	0	0	0
Gm37884	0	0	0	0	0	0
Farsb	1.28593	0.9999	1.51709	0.776955	1.20331	0.999982
Gm28995	0	0	0	0	0	0
4833412K13Rik	0	0	0	0	0	0
BC035947	-4.2899	0.221882	-3.33156	0.623852	1.98329	0.999982
Mogat1	1.91672	0.9999	-6.50303	0.990624	1.1921	0.999982
Acsl3	1.12755	0.9999	-2.16877	0.0565474	1.05628	0.999982
Utp14b	3.58411	0.0038622	1.53457	0.532321	1.04912	0.999982
Gm6159	0	0	0	0	0	0
Kcne4	1.42169	0.9999	8.41894	0.000297903	7.76979	0.00082732
Gm5830	0	0	0	0	0	0
Scg2	6.22352	0.9999	1.95227	0.999974	30.2177	0.999982
Gm19027	0	0	0	0	0	0
Ap1s3	2.40262	0.296784	2.89009	0.113251	1.69679	0.999982
Gm37886	0	0	0	0	0	0
Wdfy1	3.73312	0.0175088	3.4774	0.00425578	1.06969	0.999982
Gm10555	0	0	0	0	0	0
Mrpl44	-1.01576	0.9999	-2.54698	0.00611253	-1.24466	0.999982
Serpine2	-1.75413	0.786258	-1.86065	0.667373	-1.6613	0.999982
Gm5529	0	0	0	0	0	0
Gm28071	0	0	0	0	0	0
Gm28058	0	0	0	0	0	0
Gm38339	0	0	0	0	0	0
Fam124b	-2.02448	0.9999	-4.05964	0.999974	-1.20583	0.999982
Gm37932	0	0	0	0	0	0
Cul3	-1.72949	0.433011	-2.14727	0.0575411	-1.31627	0.999982
Gm37902	0	0	0	0	0	0
Gm37262	0	0	0	0	0	0
Gm6189	0	0	0	0	0	0
1700016L21Rik	0	0	0	0	0	0
Gm45261	-1.08311	0.9999	0	0	2.51532	0.999982
Dock10	2.05632	0.073226	2.23265	0.0223447	1.86567	0.214362
Gm37645	0	0	0	0	0	0
Gm38062	0	0	0	0	0	0
A630081D01Rik	0	0	0	0	0	0
Gm29124	0	0	0	0	0	0
Gm28066	0	0	0	0	0	0
Nyap2	-1.08311	0.9999	0	0	25.8456	0.999982
Gm37210	0	0	0	0	0	0
Gm6198	0	0	0	0	0	0
Gm5530	0	0	0	0	0	0
Gm7516	0	0	0	0	0	0
Gm37114	0	0	0	0	0	0
Irs1	-3.05093	0.000280616	-1.14853	0.999974	-3.07179	0.000251514
Gm9747	-50.7772	0.000126112	-11.959	0.0543083	-1.28135	0.999982
Rhbdd1	1.15972	0.9999	-1.16355	0.999974	1.63605	0.474877
Gm19552	0	0	0	0	0	0
Gm28940	0	0	0	0	0	0
Col4a4	1.46433	0.9999	-1.11544	0.999974	-3.17173	0.138797
Col4a3	1.07155	0.9999	-1.84312	0.474996	-5.892	0.000636116
Mff	-1.14554	0.9999	-1.3818	0.79912	-1.07054	0.999982
Gm28941	0	0	0	0	0	0
Tm4sf20	-16.9203	0.255961	-6.50676	0.990624	1.0944	0.999982
Gm19257	0	0	0	0	0	0
Gm36999	0	0	0	0	0	0
Gm17764	0	0	0	0	0	0
Agfg1	2.06091	0.0831195	1.64968	0.323433	1.64847	0.551566
AC125444.3	36.6145	0.914	11.9119	0.446874	9.62716	0.999982
AC125444.5	3.04471	0.9999	1.95227	0.999974	3.97336	0.999982
AC125444.2	-1.08311	0.9999	0	0	2.51532	0.999982
AC125444.1	1.98349	0.9999	0	0	2.51528	0.999982
AC125444.4	-1.08311	0.9999	0	0	2.51532	0.999982
AC125444.6	-1.08311	0.9999	0	0	2.51532	0.999982
AC161180.1	-1.08311	0.9999	0	0	3.97336	0.999982
Gm7553	0	0	0	0	0	0
Slc19a3	2.43135	0.9999	-4.05964	0.999974	9.80464	0.384638
Gm7539	0	0	0	0	0	0
Krtap28-10	-1.08311	0.9999	0	0	3.97336	0.999982
AC161180.2	0	0	0	0	0	0
A030005K14Rik	0	0	0	0	0	0
Krtap28-13	0	0	0	0	0	0
Gm29518	0	0	0	0	0	0
Ccl20	1.19389	0.9999	1.30744	0.999974	-1.15428	0.999982
Gm29519	0	0	0	0	0	0
Daw1	-2.53697	0.9999	-4.06197	0.999974	-9.25102	0.999982
Gm6244	0	0	0	0	0	0
Sphkap	1.93506	0.9999	0	0	9.85841	0.999982
Gm6374	0	0	0	0	0	0
Gm37517	0	0	0	0	0	0
Gm37989	0	0	0	0	0	0
Pid1	1.96602	0.260746	1.49607	0.760543	2.06564	0.252082
Gm37058	0	0	0	0	0	0
Gm18304	0	0	0	0	0	0
Dner	-94.6678	0.000344285	-9.58225	0.118623	-3.00803	0.806454
Gm37959	0	0	0	0	0	0
Gm37925	0	0	0	0	0	0
Trip12	1.09242	0.9999	1.08731	0.999974	1.15014	0.999982
Gm38374	0	0	0	0	0	0
Gm37738	0	0	0	0	0	0
Fbxo36	-1.79941	0.998586	-2.10766	0.469911	-1.14299	0.999982
Slc16a14	-1.08406	0.9999	0	0	17.0834	0.999982
Gm15433	0	0	0	0	0	0
Gm29284	0	0	0	0	0	0
C130026I21Rik	1.92774	0.851765	-2.23086	0.796739	1.82198	0.999982
Rpl19-ps1	0	0	0	0	0	0
Gm7582	0	0	0	0	0	0
Gm2389	0	0	0	0	0	0
Gm18342	0	0	0	0	0	0
A530032D15Rik	4.67151	0.230888	1.13581	0.999974	1.46351	0.999982
Gm10553	-3.02362	0.893954	-6.50303	0.990624	-1.10103	0.999982
A530040E14Rik	0	0	0	0	0	0
Gm16038	0	0	0	0	0	0
Gm2619	0	0	0	0	0	0
Gm6264	0	0	0	0	0	0
Gm7609	0	0	0	0	0	0
Gm16028	0	0	0	0	0	0
Gm16026	0	0	0	0	0	0
Gm7281	0	0	0	0	0	0
Gm2666	0	0	0	0	0	0
Gm2427	0	0	0	0	0	0
Gm7592	0	0	0	0	0	0
G530012D18Rik	5.16731	0.9999	1.95251	0.999974	1.05719	0.999982
Sp110	9.53779	4.46866e-13	2.52196	0.0168201	1.69938	0.577122
Gm16094	0	0	0	0	0	0
Sp140	10.8125	0	1.81426	0.240244	1.34517	0.999982
Gm10552	0	0	0	0	0	0
Gm17017	0	0	0	0	0	0
Sp100	4.16476	4.6725e-07	1.33427	0.964992	-1.47912	0.825421
A630001G21Rik	4.30904	0.103096	3.28629	0.24606	2.1877	0.999982
Cab39	-1.13891	0.9999	-1.50611	0.558111	1.4643	0.999982
Itm2c	2.50369	0.0628339	1.60521	0.460798	2.0882	0.273555
4933407L21Rik	-1.08311	0.9999	0	0	3.97332	0.999982
Gm28884	0	0	0	0	0	0
Gpr55	1.21009	0.9999	1.77879	0.999974	3.07749	0.843368
Gm18180	0	0	0	0	0	0
Spata3	-19.4926	0.258422	-9.36583	0.805992	-2.15759	0.999982
2810459M11Rik	-2.30551	0.0322591	-1.69002	0.300417	-1.29839	0.999982
Psmd1	-1.03916	0.9999	-2.19219	0.0250422	-1.09534	0.999982
Htr2b	-43.6914	0.000115244	-18.4119	0.0301167	-1.10254	0.999982
Gm37914	0	0	0	0	0	0
Gm21972	0	0	0	0	0	0
Armc9	-1.28102	0.9999	-1.14973	0.999974	-2.95975	0.014661
Gm16341	0	0	0	0	0	0
B3gnt7	7.90288	0.412594	8.20773	0.181421	7.91702	0.539444
Gm28626	0	0	0	0	0	0
Gm5258	0	0	0	0	0	0
Gm28627	0	0	0	0	0	0
Ncl	-4.70092	0.00101544	-2.77277	0.0157145	-1.5637	0.999982
Gm45908	0	0	0	0	0	0
Nmur1	-1.08311	0.9999	0	0	3.97342	0.999982
Tex44	-1.08311	0.9999	0	0	9.80545	0.999982
Rpl30-ps6	0	0	0	0	0	0
Ptma	2.31427	0.502927	1.64062	0.991883	1.4184	0.999982
Pde6d	-1.35478	0.9999	-1.58719	0.990624	-1.94658	0.7174
Gm37152	0	0	0	0	0	0
Cops7b	2.69019	0.0125484	1.79312	0.232679	-1.16975	0.999982
Gm37022	0	0	0	0	0	0
Nppc	3.80025	0.9999	0	0	24.2334	0.999982
Dis3l2	1.87487	0.111774	1.58514	0.320754	1.37425	0.999982
Gm29097	0	0	0	0	0	0
Gm29055	0	0	0	0	0	0
Gm37485	0	0	0	0	0	0
Gm38142	0	0	0	0	0	0
Gm38010	0	0	0	0	0	0
Gm37541	0	0	0	0	0	0
Gm38021	0	0	0	0	0	0
Gm6136	0	0	0	0	0	0
Gm37967	0	0	0	0	0	0
Gm28375	0	0	0	0	0	0
Gm37017	0	0	0	0	0	0
Gm37447	0	0	0	0	0	0
Akp-ps1	0	0	0	0	0	0
Alppl2	-1.08311	0.9999	0	0	6.88965	0.999982
Alpi	-1.08311	0.9999	0	0	6.88975	0.999982
Gm29372	0	0	0	0	0	0
Akp3	-9.00394	0.671904	-4.06224	0.999974	-3.30503	0.999982
Ecel1	-1.08311	0.9999	0	0	5.43141	0.999982
Prss56	-1.08606	0.9999	0	0	8.32366	0.999982
Chrnd	1.98418	0.9999	0	0	17.0962	0.999982
Chrng	-5.13084	0.588495	-6.50676	0.990624	1.28104	0.999982
Eif4e2	1.12439	0.9999	-1.86736	0.143035	-1.17775	0.999982
Efhd1	1.82503	0.9999	1.08683	0.999974	2.08691	0.999982
Efhd1os	0	0	0	0	0	0
Gigyf2	1.53853	0.686622	1.55632	0.390339	-1.26807	0.999982
Kcnj13	-67.7561	0.0168392	-21.1819	0.333096	2.20344	0.999982
3110079O15Rik	-5.01431	0.457156	-11.3945	0.622739	-3.64898	0.933375
Ngef	1.28172	0.9999	-2.97754	0.000606428	-6.98555	8.67622e-11
Neu2	-1.6946	0.9999	-5.06046	0.0171161	-4.7275	0.0196297
Gm17181	0	0	0	0	0	0
Gm6153	0	0	0	0	0	0
Inpp5d	1.6895	0.305087	3.85573	2.10256e-06	2.84194	0.00125683
Atg16l1	1.96416	0.0917961	2.09261	0.0201181	1.28671	0.999982
Gm25395	0	0	0	0	0	0
Scarna6	0	0	0	0	0	0
Sag	9.10789	0.402047	4.48941	0.607484	1.0534	0.999982
Dgkd	1.69604	0.42732	2.23435	0.0227537	1.00971	0.999982
Gm19582	0	0	0	0	0	0
4833421G17Rik	0	0	0	0	0	0
Gm38365	0	0	0	0	0	0
Usp40	1.6834	0.424716	1.25517	0.999974	-1.22189	0.999982
Gm5832	0	0	0	0	0	0
Gm15375	0	0	0	0	0	0
Ugt1a10	4.4981	0.0394956	-2.65524	0.409	-6.66305	0.00676086
Ugt1a9	-1.11128	0.9999	-7.0458	1.80413e-05	-14.5767	1.00409e-07
Ugt1a8	46.3715	0.000346885	-1.31561	0.999974	-1.57576	0.999982
Ugt1a7c	2.05024	0.497471	1.46225	0.966686	-1.28691	0.999982
Gm15373	0	0	0	0	0	0
Ugt1a6b	1.01109	0.9999	-2.23218	0.0352643	-1.37717	0.999982
Gm15372	0	0	0	0	0	0
Gm15370	0	0	0	0	0	0
Ugt1a6a	1.18743	0.9999	-2.00465	0.18171	-1.716	0.932138
Gm15369	0	0	0	0	0	0
Gm15374	0	0	0	0	0	0
Gm15371	0	0	0	0	0	0
Ugt1a5	-1.0658	0.9999	-5.79097	4.48194e-08	-3.89978	0.00332669
Gm15368	0	0	0	0	0	0
Gm15376	0	0	0	0	0	0
Ugt1a2	13.1292	0.00206817	8.9148	0.000677509	1.22757	0.999982
Dnajb3	-17.1385	0.0157549	-18.7287	0.374376	1.05443	0.999982
Ugt1a1	-1.32771	0.9999	-8.02026	4.52092e-07	-4.99923	0.00691887
Mroh2a	-4.55198	9.37661e-05	-4.38452	3.16631e-05	-3.47227	0.0027168
Hjurp	-1.12334	0.9999	-1.01594	0.999974	-1.99507	0.335981
Trpm8	1.13226	0.9999	-4.05964	0.999974	10.1316	0.317831
4930453O03Rik	0	0	0	0	0	0
Spp2	-1.21207	0.9999	-4.18107	0.000584638	-3.61428	0.0132018
Glrp1	14.7102	0.9999	7.39749	0.744763	20.0126	0.999982
Gm38130	0	0	0	0	0	0
Arl4c	1.18527	0.9999	1.19166	0.999974	1.12025	0.999982
Gm29335	0	0	0	0	0	0
Gm4753	0	0	0	0	0	0
Gm18699	0	0	0	0	0	0
Sh3bp4	-1.0022	0.9999	1.34747	0.999974	1.57494	0.999812
Gm38312	0	0	0	0	0	0
Gm5259	0	0	0	0	0	0
Agap1	1.53361	0.819514	2.20054	0.0517159	2.60522	0.0440727
Gm37297	0	0	0	0	0	0
Gm28499	0	0	0	0	0	0
Gm37521	0	0	0	0	0	0
Gbx2	-1.08897	0.9999	0	0	15.5086	0.999982
Asb18	2.84682	0.9999	1.2613	0.999974	3.09173	0.999982
Iqca	-1.08311	0.9999	0	0	28.7609	0.999982
Ackr3	-1.18166	0.9999	-1.41125	0.999974	1.42309	0.999982
Gm38277	0	0	0	0	0	0
Gm35048	0	0	0	0	0	0
Cops8	1.2172	0.9999	-1.02642	0.999974	1.22079	0.999982
Col6a3	-1.002	0.9999	1.18783	0.999974	-1.19414	0.999982
Gm36970	0	0	0	0	0	0
4930474B08Rik	0	0	0	0	0	0
Mlph	1.47944	0.9999	1.85003	0.862177	-1.20911	0.999982
Prlh	-1.08311	0.9999	0	0	3.9734	0.999982
Rab17	-1.35118	0.9999	-2.674	0.0116787	-2.17163	0.120122
Lrrfip1	1.34599	0.9999	1.73258	0.158379	1.73598	0.349471
Rbm44	-1.60939	0.9999	1.30758	0.999974	1.53886	0.999982
Gm7776	0	0	0	0	0	0
Ramp1	-2.12095	0.417905	-1.45068	0.999974	-1.16316	0.999982
Ube2f	1.364	0.998586	1.0687	0.999974	-1.09022	0.999982
Gm7785	0	0	0	0	0	0
Scly	1.15666	0.9999	1.2501	0.999974	-1.17111	0.999982
Gm17090	0	0	0	0	0	0
Espnl	7.75201	0.122045	3.02017	0.644122	-1.58473	0.999982
Klhl30	-1.60824	0.9999	-1.2873	0.999974	1.53134	0.999982
Erfe	-2.67242	0.68961	1.26672	0.999974	1.10345	0.999982
Ilkap	1.5671	0.521567	-1.02906	0.999974	-1.11616	0.999982
Hes6	-1.44732	0.902916	-3.40949	0.000690296	-3.10116	0.00292103
Per2	6.38126	5.14503e-05	2.07242	0.129799	-1.20652	0.999982
Gm28381	0	0	0	0	0	0
Gm19085	0	0	0	0	0	0
Traf3ip1	1.06394	0.9999	1.32918	0.999974	-1.17458	0.999982
Asb1	1.64948	0.489792	2.18135	0.0408845	1.21457	0.999982
Gm29100	0	0	0	0	0	0
Twist2	-2.43781	0.9999	-1.68649	0.999974	1.57228	0.999982
Gm29101	0	0	0	0	0	0
Gm37600	0	0	0	0	0	0
Hdac4	1.47942	0.832435	1.7356	0.281374	1.53074	0.957704
Gm37048	0	0	0	0	0	0
Gm37036	0	0	0	0	0	0
Gm7837	0	0	0	0	0	0
Ndufa10	-1.17677	0.9999	-2.40139	0.0209402	-1.58648	0.999982
Olfr1416	10.5094	0.9999	1.95227	0.999974	12.6544	0.999982
Olfr1415	-1.08311	0.9999	0	0	20.0119	0.999982
Olfr1414	-1.08311	0.9999	0	0	30.2206	0.999982
Olfr1413	0	0	0	0	0	0
1700054K02Rik	0	0	0	0	0	0
Gm28478	0	0	0	0	0	0
Olfr1412	-1.08311	0.9999	0	0	9.80602	0.999982
Gm44098	0	0	0	0	0	0
Olfr1411	-1.08399	0.9999	0	0	15.6505	0.999982
Gm44099	0	0	0	0	0	0
Olfr1410	-1.08311	0.9999	0	0	11.2639	0.999982
Olfr12	3.67796	0.9999	0	0	24.27	0.999982
Cops9	-1.54371	0.679923	-1.9981	0.124395	-1.5306	0.931635
Otos	-1.08311	0.9999	1.95227	0.999974	2.51532	0.999982
Gm29481	0	0	0	0	0	0
Gpc1	1.17843	0.9999	1.50979	0.990624	1.43604	0.999982
Gm29480	0	0	0	0	0	0
Ankmy1	1.30149	0.9999	1.03224	0.999974	1.4031	0.999982
Dusp28	5.24226	0.000318969	-1.33641	0.999974	-1.23824	0.999982
5033417F24Rik	0	0	0	0	0	0
Rnpepl1	-1.25662	0.9999	-1.54776	0.364954	-2.26185	0.0196641
9430060I03Rik	0	0	0	0	0	0
Capn10	2.13319	0.0292984	1.77196	0.13607	1.0001	0.999982
Gpr35	5.15424	0.00035991	9.34513	1.47259e-08	9.12141	1.70239e-07
Gm18697	0	0	0	0	0	0
Aqp12	-1.14948	0.9999	0	0	5.26715	0.999982
Kif1a	-1.2736	0.9999	-1.06116	0.999974	-1.13747	0.999982
Agxt	1.45319	0.9999	-1.39409	0.999974	-2.76855	0.38661
2310007B03Rik	-1.66044	0.9999	6.01464	0.253931	3.52314	0.969477
Crocc2	-1.08311	0.9999	0	0	20.0121	0.999982
Sned1	1.18452	0.9999	-1.65256	0.37167	-8.23761	1.40429e-07
Mterf4	1.04641	0.9999	-1.40002	0.777009	-1.13067	0.999982
Gm28535	0	0	0	0	0	0
Gm7867	0	0	0	0	0	0
Pask	1.89241	0.834718	3.63459	0.0287693	2.03979	0.914505
Ppp1r7	-1.66165	0.37595	-1.55404	0.450948	-1.39213	0.999982
Ano7	-3.68509	0.698853	-1.07755	0.999974	1.38077	0.999982
Hdlbp	1.26684	0.9999	1.2626	0.999974	1.14561	0.999982
Gm17415	0	0	0	0	0	0
Sept2_1	1.04333	0.9999	-1.02706	0.999974	1.21018	0.999982
Sept2_2	0	0	0	0	0	0
Farp2	-1.39195	0.923043	-1.34438	0.990624	-1.35407	0.999982
Gm37250	0	0	0	0	0	0
Stk25	1.1978	0.9999	1.07947	0.999974	1.04221	0.999982
Gm28536	0	0	0	0	0	0
Bok	-1.14652	0.9999	-1.40694	0.999974	1.46834	0.999982
Thap4	-1.18862	0.9999	-1.97323	0.0649097	-1.17344	0.999982
Gm10550	0	0	0	0	0	0
Atg4b	1.31637	0.9999	1.05765	0.999974	1.21102	0.999982
Dtymk	1.56431	0.673042	1.03962	0.999974	-1.18106	0.999982
Ing5	1.02839	0.9999	-1.04886	0.999974	1.09795	0.999982
D2hgdh	-1.48887	0.584226	-1.6265	0.285349	-2.5776	0.00268844
Gal3st2	1.29153	0.9999	-6.50303	0.990624	-3.91751	0.999982
Gm18666	0	0	0	0	0	0
Gm9994	-1.51413	0.9999	-2.17994	0.999974	-1.42917	0.999982
Gm7889	0	0	0	0	0	0
Gm6086	-9.17757	0.0305515	-23.6418	0.301094	-1.36091	0.999982
Neu4	-8.90581	0.383439	-12.3874	0.663504	-1.19111	0.999982
Pdcd1	38.0137	0.867579	7.25614	0.749588	46.2625	0.999982
Gm7891	0	0	0	0	0	0
Gm7895	0	0	0	0	0	0
Gm5264	0	0	0	0	0	0
Fam174a	-1.16468	0.9999	-1.41835	0.86871	1.27473	0.999982
BC055308	0	0	0	0	0	0
Gm15427	0	0	0	0	0	0
St8sia4	1.45567	0.9999	1.706	0.876045	1.07812	0.999982
Gm37642	0	0	0	0	0	0
Gm37761	0	0	0	0	0	0
Gm37076	0	0	0	0	0	0
Gm1833	0	0	0	0	0	0
Slco4c1	-1.355	0.9999	-1.22513	0.999974	3.8966	0.818192
Panct2	0	0	0	0	0	0
Slco6b1	0	0	0	0	0	0
Gm9499	0	0	0	0	0	0
Gm6430	0	0	0	0	0	0
Slco6c1	-1.08311	0.9999	1.95227	0.999974	2.51527	0.999982
Gm7133	0	0	0	0	0	0
Gm7135	0	0	0	0	0	0
Gm37171	0	0	0	0	0	0
D1Ertd622e	2.10722	0.0891333	1.72768	0.205528	1.09804	0.999982
Ppip5k2	-1.07723	0.9999	2.18473	0.103613	2.04669	0.277297
Gin1	2.90539	0.0571645	3.25721	0.00363047	1.33694	0.999982
Pam	1.1826	0.9999	-1.45967	0.610479	1.06584	0.999982
Gm37140	0	0	0	0	0	0
Gm3531	0	0	0	0	0	0
Gm7952	0	0	0	0	0	0
Gm29462	0	0	0	0	0	0
Slco6d1	0	0	0	0	0	0
Gm3555	0	0	0	0	0	0
Gm29460	0	0	0	0	0	0
Gm18248	0	0	0	0	0	0
Cntnap5b	-1.08311	0.9999	0	0	2.51532	0.999982
Tdpx-ps1	0	0	0	0	0	0
Gm37877	0	0	0	0	0	0
Gm19029	0	0	0	0	0	0
Gm29668	0	0	0	0	0	0
Gm29667	0	0	0	0	0	0
Gm18700	0	0	0	0	0	0
Gm18185	0	0	0	0	0	0
Gm29334	0	0	0	0	0	0
Gm28801	0	0	0	0	0	0
Psmb6-ps2	0	0	0	0	0	0
Gm18969	0	0	0	0	0	0
Gm28188	0	0	0	0	0	0
Gm28623	0	0	0	0	0	0
Gm3116	0	0	0	0	0	0
Gm20281	0	0	0	0	0	0
Gm18728	0	0	0	0	0	0
Gm29141	0	0	0	0	0	0
Gm37789	0	0	0	0	0	0
Gm18447	0	0	0	0	0	0
Gm29140	0	0	0	0	0	0
Gm5260	0	0	0	0	0	0
Gm29592	0	0	0	0	0	0
Gm29011	0	0	0	0	0	0
Cdh20	-1.08311	0.9999	0	0	8.34747	0.999982
Gm38031	0	0	0	0	0	0
Gm36969	0	0	0	0	0	0
Gm15699	0	0	0	0	0	0
Gm29013	0	0	0	0	0	0
Rnf152	-4.90733	2.59096e-06	-5.55652	5.34934e-10	-9.93969	5.03474e-13
Gm29014	0	0	0	0	0	0
Gm17634	0	0	0	0	0	0
Gm28403	0	0	0	0	0	0
Pign	1.85076	0.329094	2.15988	0.028934	1.58721	0.897102
Gm28404	0	0	0	0	0	0
Gm20302	0	0	0	0	0	0
Gm8004	0	0	0	0	0	0
2310035C23Rik	1.7441	0.259702	1.69634	0.219809	1.05879	0.999982
Gm37566	0	0	0	0	0	0
Gm10193	0	0	0	0	0	0
Tnfrsf11a	2.89983	0.014571	2.05851	0.13578	1.95772	0.35793
Gm37779	0	0	0	0	0	0
Gm18801	0	0	0	0	0	0
Zcchc2	1.52963	0.563654	-1.36726	0.829395	-1.99707	0.100675
Gm37372	0	0	0	0	0	0
Gm26509	0	0	0	0	0	0
Phlpp1	-1.36102	0.857435	-1.50963	0.409931	-1.86368	0.117312
Gm38235	0	0	0	0	0	0
Gm6651	0	0	0	0	0	0
Bcl2	1.43012	0.9999	1.87644	0.21426	-1.05056	0.999982
D630008O14Rik	0	0	0	0	0	0
Gm37053	0	0	0	0	0	0
Kdsr	-1.54934	0.501792	-2.18438	0.00985829	-2.08919	0.055122
Vps4b	-1.03001	0.9999	-1.62791	0.236115	-1.20766	0.999982
Serpinb5	1.98346	0.9999	0	0	3.9734	0.999982
Pou2f3-rs1	0	0	0	0	0	0
Serpinb12	-1.08311	0.9999	0	0	1.05719	0.999982
Serpinb13	-1.08311	0.9999	0	0	5.43145	0.999982
Gm8080	0	0	0	0	0	0
Serpinb3a	-1.08311	0.9999	0	0	5.43151	0.999982
Serpinb3d	0	0	0	0	0	0
Gm15388	0	0	0	0	0	0
Serpinb3b	-1.08311	0.9999	0	0	2.51532	0.999982
Gm8084	0	0	0	0	0	0
Gm15390	0	0	0	0	0	0
Serpinb3c	-1.08311	0.9999	0	0	2.51528	0.999982
Gm8089	0	0	0	0	0	0
Serpinb11	0	0	0	0	0	0
Serpinb7	-3.80466	0.756914	-2.06209	0.999974	-1.22719	0.999982
Serpinb2	24.2439	0.9999	11.1963	0.466188	680.664	0.232154
Serpinb8	2.48455	0.0939752	-2.88088	0.0229492	-3.73037	0.00449649
Gm18448	0	0	0	0	0	0
Gm28282	0	0	0	0	0	0
Gm5702	0	0	0	0	0	0
Gm38212	0	0	0	0	0	0
Gm28283	0	0	0	0	0	0
Gm6679	0	0	0	0	0	0
Gm17847	0	0	0	0	0	0
Gm28281	0	0	0	0	0	0
Gm8141	0	0	0	0	0	0
Cdh7	-10.0783	0.671904	-4.06224	0.999974	1.69917	0.999982
Gm18552	0	0	0	0	0	0
Gm3332	0	0	0	0	0	0
Gm6693	0	0	0	0	0	0
Cdh19	9.40935	0.9999	0	0	12.722	0.999982
Gm38255	0	0	0	0	0	0
Gm36944	0	0	0	0	0	0
Gm19927	0	0	0	0	0	0
Gm8173	0	0	0	0	0	0
Gm37934	0	0	0	0	0	0
Dsel	-1.30467	0.9999	-1.09085	0.999974	-1.04337	0.999982
Gm6028	0	0	0	0	0	0
Gm17752	0	0	0	0	0	0
Gm6717	0	0	0	0	0	0
Gm19086	0	0	0	0	0	0
Gm18406	0	0	0	0	0	0
Gm8204	0	0	0	0	0	0
Gm28190	0	0	0	0	0	0
Gm17946	0	0	0	0	0	0
Gm18181	0	0	0	0	0	0
Gm4854	0	0	0	0	0	0
Gm17916	0	0	0	0	0	0
Cntnap5a	-1.08311	0.9999	0	0	22.9286	0.999982
Gm28263	0	0	0	0	0	0
Gm19965	-1.08419	0.9999	0	0	11.2455	0.999982
Gm17777	0	0	0	0	0	0
Gm28361	0	0	0	0	0	0
Zfp813-ps	0	0	0	0	0	0
Gm28362	0	0	0	0	0	0
Gm28363	0	0	0	0	0	0
Gm28359	0	0	0	0	0	0
Gm18182	0	0	0	0	0	0
B020011L13Rik	0	0	0	0	0	0
Gm28360	-1.08311	0.9999	0	0	5.43155	0.999982
Gm28169	0	0	0	0	0	0
Gm7195	0	0	0	0	0	0
Gm28168	-1.08311	0.9999	0	0	8.34759	0.999982
Gm7145	-9.00397	0.671904	-4.06225	0.999974	-7.86333	0.999982
Gm28358	0	0	0	0	0	0
Gm29489	0	0	0	0	0	0
Gm29490	0	0	0	0	0	0
Gm29104	0	0	0	0	0	0
Gm29106	-8.998	0.698009	-4.05964	0.999974	2.7599	0.999982
Gm7200	0	0	0	0	0	0
Tsn	-1.25867	0.9999	-1.40109	0.778375	1.07533	0.999982
Nifk	-1.06379	0.9999	-1.12969	0.999974	1.36927	0.999982
Clasp1	1.81026	0.155895	1.5592	0.357069	1.39926	0.999982
2900060B14Rik	0	0	0	0	0	0
Gm28466	0	0	0	0	0	0
Tfcp2l1	-2.16062	0.0544336	-1.48053	0.637711	-1.47166	0.966223
Gm28882	0	0	0	0	0	0
Gm28467	0	0	0	0	0	0
Gli2	-1.48209	0.9999	-2.60677	0.994781	1.6208	0.999982
Gm8321	0	0	0	0	0	0
Gm3508	0	0	0	0	0	0
Inhbb	9.38339	9.98153e-11	8.04507	2.72552e-10	19.7903	0
Ralb	1.36805	0.9999	1.01795	0.999974	1.53729	0.858596
Gm29454	0	0	0	0	0	0
Gm27184	0	0	0	0	0	0
Tmem185b	1.34343	0.9999	1.02486	0.999974	1.70706	0.43439
Epb41l5	-1.37257	0.821095	-1.76326	0.114732	-1.66288	0.328457
Gm37219	0	0	0	0	0	0
Ptpn4	-1.45509	0.671904	1.06678	0.999974	1.47588	0.804725
Gm3851	0	0	0	0	0	0
Gm37745	0	0	0	0	0	0
Gm29657	0	0	0	0	0	0
Gm8338	0	0	0	0	0	0
Gm29658	0	0	0	0	0	0
Gm3551	0	0	0	0	0	0
Tmem177	-1.58909	0.592211	-1.42001	0.947864	-1.50589	0.968208
Cfap221	1.98349	0.9999	0	0	8.34765	0.999982
Gm17973	0	0	0	0	0	0
Sctr	8.57808	0.452021	7.6229	0.249555	8.04438	0.640535
Tmem37	-2.96434	0.0206458	-2.79369	0.00556979	1.07924	0.999982
Dbi	-1.65137	0.672231	-4.70252	1.66557e-06	-1.78751	0.643818
3110009E18Rik	2.5266	0.689771	2.57669	0.593318	-1.55803	0.999982
Steap3	-3.44129	0.00200851	-2.61998	0.0057932	-4.21449	0.000155806
C1ql2	3.04367	0.9999	0	0	8.3477	0.999982
Marco	4.21057	0.00014041	3.79124	1.4677e-05	11.0246	1.13789e-12
En1	-1.08311	0.9999	0	0	3.9734	0.999982
Gm29344	0	0	0	0	0	0
Gm37043	0	0	0	0	0	0
Gm38283	0	0	0	0	0	0
Insig2	-1.76624	0.567743	-1.00698	0.999974	1.85806	0.597066
Gm37174	0	0	0	0	0	0
Ccdc93	1.0919	0.9999	1.0918	0.999974	-1.0357	0.999982
Gm15392	0	0	0	0	0	0
Gm15393	0	0	0	0	0	0
Htr5b	-1.08311	0.9999	0	0	8.34763	0.999982
Gm8217	0	0	0	0	0	0
Ddx18	1.00014	0.9999	-1.41045	0.821892	1.08062	0.999982
Gm28591	0	0	0	0	0	0
Gm37920	0	0	0	0	0	0
Gm15394	0	0	0	0	0	0
Gm8392	0	0	0	0	0	0
Gm36982	0	0	0	0	0	0
Gm29192	0	0	0	0	0	0
Gm37970	0	0	0	0	0	0
Gm8403	0	0	0	0	0	0
Gm28911	0	0	0	0	0	0
Gm20058	0	0	0	0	0	0
Gm28912	0	0	0	0	0	0
Dpp10	362.235	0.28532	30.9172	0.120073	44.2848	0.999982
Gm37478	0	0	0	0	0	0
Gm37221	0	0	0	0	0	0
Gm37066	0	0	0	0	0	0
Gm37781	0	0	0	0	0	0
Gm37396	0	0	0	0	0	0
Gm38263	0	0	0	0	0	0
Gm28929	0	0	0	0	0	0
Gm18875	0	0	0	0	0	0
Gm37551	0	0	0	0	0	0
Gm38073	0	0	0	0	0	0
Gm28299	0	0	0	0	0	0
Gm37717	0	0	0	0	0	0
Actr3	1.11033	0.9999	-1.35209	0.897555	1.01853	0.999982
Slc35f5	1.92334	0.270845	-1.03306	0.999974	1.8284	0.473191
Gm18444	0	0	0	0	0	0
Gpr39	2.4139	0.02402	1.36594	0.999974	2.37323	0.0327981
Lypd1	-4.54753	0.327765	-10.2014	0.105405	-1.8447	0.999982
Nckap5	3.77797	0.0318999	2.12979	0.331227	-2.24945	0.578373
Gm37161	0	0	0	0	0	0
Gm37936	0	0	0	0	0	0
Gm38177	0	0	0	0	0	0
Gm5261	0	0	0	0	0	0
Mgat5	1.54705	0.496549	2.66198	0.00121642	2.35943	0.0121656
Gm37772	0	0	0	0	0	0
Gm37510	0	0	0	0	0	0
Gm8451	0	0	0	0	0	0
Gm23370_1	0	0	0	0	0	0
Gm23370_2	0	0	0	0	0	0
Gm38301	0	0	0	0	0	0
Tmem163	3.10926	0.9999	3.00796	0.999974	2.26371	0.999982
Acmsd	-2.33074	0.0958378	-2.63837	0.00902965	-1.32317	0.999982
2900009J06Rik	0	0	0	0	0	0
Ccnt2	1.7211	0.672243	1.78951	0.206492	-1.46831	0.999982
Map3k19	2.27962	0.9999	2.36699	0.999974	3.28467	0.999982
Rab3gap1	1.49147	0.630496	1.10956	0.999974	1.25911	0.999982
Zranb3	-1.46591	0.930238	-1.01584	0.999974	-1.66766	0.735277
Gm28800	0	0	0	0	0	0
Gm38248	0	0	0	0	0	0
Rpl28-ps1	0	0	0	0	0	0
Gm37625	0	0	0	0	0	0
Gm38026	0	0	0	0	0	0
R3hdm1	1.24694	0.9999	1.23716	0.999974	-1.59918	0.999982
Gm29383	0	0	0	0	0	0
Gm37588	0	0	0	0	0	0
Gm37868	0	0	0	0	0	0
Gm37407	0	0	0	0	0	0
Ubxn4	1.8336	0.340646	-1.23055	0.999974	1.12448	0.999982
Lct	1.99918	0.9999	2.34585	0.999974	3.50524	0.999982
Mcm6	1.77456	0.411174	1.70907	0.390339	1.18462	0.999982
Dars	-1.22105	0.9999	-2.09238	0.127254	-1.34498	0.999982
Gm29598	0	0	0	0	0	0
Gm29597	0	0	0	0	0	0
Gm6170	0	0	0	0	0	0
Cxcr4	2.78944	0.349738	2.75326	0.400767	4.01794	0.105776
Gm29599	0	0	0	0	0	0
Thsd7b	-1.08311	0.9999	0	0	11.2637	0.999982
Gm38240	0	0	0	0	0	0
Gm38330	0	0	0	0	0	0
Gm36951	0	0	0	0	0	0
Gm15790	0	0	0	0	0	0
Rpl31-ps9	0	0	0	0	0	0
Gm37479	0	0	0	0	0	0
Gm37064	0	0	0	0	0	0
Gm37278	0	0	0	0	0	0
Gm29428	0	0	0	0	0	0
Cd55b	1.27486	0.9999	-1.57178	0.999974	1.22146	0.999982
Gm15674	0	0	0	0	0	0
Cd55	2.0659	0.0665782	1.35099	0.828888	2.61028	0.00555673
Gm16083	0	0	0	0	0	0
Gm37109	0	0	0	0	0	0
Gm37283	0	0	0	0	0	0
Zp3r	-2.02561	0.9999	-4.06197	0.999974	-1.20656	0.999982
C4bp	1.97461	0.388148	2.32278	0.16011	3.9041	0.00349603
Gm29427	0	0	0	0	0	0
C4bp-ps1	0	0	0	0	0	0
Pfkfb2	4.67575	0.00312578	6.75718	7.6764e-08	3.2744	0.0541969
Yod1	1.84653	0.317917	1.74593	0.315344	1.66467	0.7092
Gm37163	0	0	0	0	0	0
AA986860	1.3597	0.9999	2.28134	0.0862997	6.07387	1.18582e-06
Gm28857	0	0	0	0	0	0
Fcamr	11.5762	0.174396	63.7794	3.36505e-05	33.4104	0.0151853
Gm15848	0	0	0	0	0	0
Pigr	-1.41149	0.9999	-4.75046	0.0018355	-6.86332	0.000621409
Fcmr	1.84364	0.9999	-4.80367	0.206492	-12.4799	0.00463087
Il24	-1.08352	0.9999	0	0	9.80592	0.999982
Il20	-1.08311	0.9999	0	0	3.9734	0.999982
Il19	17.2914	0.9999	1.95227	0.999974	12.6924	0.999982
Il10	7.33544	0.0688918	7.45839	0.0164282	10.4334	0.0212805
Mapkapk2	1.77363	0.521811	1.45641	0.699565	2.48597	0.094097
Gm37084	0	0	0	0	0	0
Dyrk3	6.16809	9.46709e-05	1.47518	0.999974	1.33829	0.999982
Eif2d	1.63385	0.361779	-1.0364	0.999974	-1.11623	0.999982
Rassf5	1.35675	0.997414	1.00823	0.999974	1.01894	0.999982
Gm17796	0	0	0	0	0	0
Ikbke	43.0082	0	6.27443	9.43726e-10	3.25866	0.0132372
Gm28914	0	0	0	0	0	0
Gm28913	0	0	0	0	0	0
Srgap2	1.31722	0.9999	1.26159	0.999974	-1.37976	0.999982
Gm38262	0	0	0	0	0	0
Gm37954	0	0	0	0	0	0
Gm29488	0	0	0	0	0	0
Gm29487	0	0	0	0	0	0
Fam72a	-1.06191	0.9999	-1.28892	0.999974	-1.65614	0.999982
Avpr1b	-1.08355	0.9999	0	0	18.565	0.999982
Gm8532	0	0	0	0	0	0
Ctse	1.44311	0.9999	-1.34422	0.999974	1.12591	0.999982
Rab7b	2.06908	0.378137	3.51607	0.00461067	1.98101	0.593791
Slc26a9	-1.99211	0.9999	2.36709	0.999974	4.61994	0.999982
Pm20d1	-1.70489	0.521721	-3.33597	0.000212943	-2.85619	0.0151853
Slc41a1	4.3247	3.37068e-05	4.71078	2.30147e-06	3.84126	0.00020546
Rab29	1.17984	0.9999	-1.49218	0.688982	-1.06494	0.999982
Gm29105	0	0	0	0	0	0
Nucks1	-1.72443	0.607108	1.0989	0.999974	1.50155	0.999982
Gm38067	0	0	0	0	0	0
Gm37676	0	0	0	0	0	0
Slc45a3	-1.94179	0.11629	3.317	1.98384e-05	2.19852	0.0439344
Elk4	-1.29921	0.9999	-1.02255	0.999974	1.04966	0.999982
Mfsd4a	-373.435	0	-136.556	0	1.23584	0.999982
Gm37120	0	0	0	0	0	0
Cdk18	-1.21321	0.9999	1.09053	0.999974	-2.30954	0.0532584
Gm29629	0	0	0	0	0	0
Lemd1	-1.08311	0.9999	0	0	8.34742	0.999982
Gm10188	-1.08311	0.9999	0	0	5.43145	0.999982
Gm7241	0	0	0	0	0	0
Klhdc8a	2.45836	0.0379502	1.2688	0.999974	2.01824	0.22614
Nuak2	3.27057	0.000191539	1.69214	0.232787	-1.26777	0.999982
Tmcc2	-1.06867	0.9999	2.37995	0.0371466	-1.28452	0.999982
Gm15849	0	0	0	0	0	0
Dstyk	1.41908	0.840764	1.78521	0.155482	1.01945	0.999982
Rbbp5	1.2734	0.9999	1.0574	0.999974	-1.26002	0.999982
Tmem81	1.50105	0.9999	1.92201	0.331542	-2.09716	0.623987
Cntn2	-1.63058	0.9999	2.36356	0.334602	1.07651	0.999982
Nfasc	1.09654	0.9999	2.31393	0.446352	2.45266	0.722989
Gm10538	0	0	0	0	0	0
Lrrn2	4.10363	0.9999	0	0	14.1801	0.999982
Gm38308	0	0	0	0	0	0
Mdm4	3.11558	0.0646313	2.06337	0.118746	-1.07457	0.999982
Gm29257	0	0	0	0	0	0
Pik3c2b	-1.30304	0.9999	-1.0081	0.999974	-2.30434	0.0280196
Gm28609	0	0	0	0	0	0
Gm26616	0	0	0	0	0	0
Ppp1r15b	1.09332	0.9999	1.25045	0.999974	1.23557	0.999982
Plekha6	1.22846	0.9999	-1.05665	0.999974	-3.34	0.00613683
Gm19461	0	0	0	0	0	0
Golt1a	1.26092	0.9999	-1.20183	0.999974	1.46438	0.999982
Gm28040	1.21182	0.9999	-2.20125	0.999974	2.58378	0.999982
Kiss1	1.62839	0.9999	-5.15842	0.536311	1.92656	0.999982
Ren1	4.10363	0.9999	0	0	18.5542	0.999982
Etnk2	-2.0631	0.242115	-1.34968	0.999974	1.18318	0.999982
Sox13	-1.05365	0.9999	1.08736	0.999974	-1.62943	0.657907
Gm8596	0	0	0	0	0	0
Snrpe	-1.61695	0.49064	-2.42168	0.00986375	-1.1118	0.999982
Zc3h11a	2.35251	0.0536183	1.92415	0.0710658	1.46903	0.999982
Gm38394	2.13245	0.339604	1.90962	0.204123	1.32091	0.999982
Zbed6	2.69454	0.454596	1.99805	0.630624	1.51452	0.999982
Lax1	6.43023	0.0160004	3.0528	0.225749	1.14661	0.999982
Atp2b4	-1.48909	0.641806	-1.10533	0.999974	-1.64702	0.462331
Gm37368	0	0	0	0	0	0
Gm10537	0	0	0	0	0	0
Optc	3.30096	0.9999	1.81024	0.999974	3.43234	0.999982
Gm15851	0	0	0	0	0	0
Prelp	-4.64258	9.75958e-07	-2.63987	0.000756808	-1.54975	0.793103
Gm18970	0	0	0	0	0	0
Fmod	-2.01512	0.567451	-4.25854	0.00295269	-5.41466	0.00206023
Btg2	19.7572	0	8.32774	4.69447e-14	12.5946	8.25621e-13
Gm38140	0	0	0	0	0	0
Gm8618	0	0	0	0	0	0
Chit1	-1.08613	0.9999	0	0	5.41152	0.999982
Chil1	15.5337	1.81136e-07	21.9194	1.61544e-08	174.7	0
Mybph	8.34598	0.9999	3.3903	0.999974	14.1805	0.999982
Adora1	-2.59511	0.00366589	2.09332	0.0180952	2.93035	0.00060531
Myog	-1.08311	0.9999	0	0	6.88943	0.999982
Ppfia4	-1.47213	0.9999	1.20631	0.999974	1.02928	0.999982
Tmem183a	-1.11865	0.9999	-1.75254	0.170089	-1.19602	0.999982
4933406M09Rik	-8.998	0.671904	-4.05964	0.999974	1.18034	0.999982
Cyb5r1	-1.58042	0.668572	1.27229	0.999974	1.19363	0.999982
Adipor1	-1.38314	0.9999	-1.53657	0.530381	1.20881	0.999982
Gm37935	0	0	0	0	0	0
Klhl12	1.07832	0.9999	-1.26755	0.999974	-1.10815	0.999982
Rabif	1.36255	0.940057	-1.26467	0.999974	1.05694	0.999982
Gm15454	0	0	0	0	0	0
Gm29376	0	0	0	0	0	0
Mgat4e	-1.08311	0.9999	1.95227	0.999974	8.34759	0.999982
Kdm5b	1.03963	0.9999	1.13165	0.999974	1.07192	0.999982
Syt2	1.98346	0.9999	0	0	24.3864	0.999982
Ppp1r12b	2.46094	0.141535	3.32918	0.000468243	1.1132	0.999982
Gm37949	0	0	0	0	0	0
Gm37677	0	0	0	0	0	0
Gm28892	0	0	0	0	0	0
Ube2t	-1.75972	0.9999	-1.52158	0.999974	-1.4206	0.999982
Lgr6	-3.08467	0.437275	-4.45414	0.38975	1.06764	0.999982
Gm10535	0	0	0	0	0	0
Ptpn7	2.82939	0.190649	3.81823	0.0294241	3.4735	0.0855869
Arl8a	1.3712	0.926542	-1.10342	0.999974	1.54885	0.670169
Gm15445	0	0	0	0	0	0
Gpr37l1	5.59874	0.619477	1.3066	0.999974	1.00414	0.999982
Gm4204	0	0	0	0	0	0
Gm26642	0	0	0	0	0	0
Elf3	36.7019	0	9.60063	1.5021e-06	12.8414	1.6447e-08
Rnpep	3.39807	0.000520046	1.56579	0.366953	1.15088	0.999982
Timm17a	-1.03347	0.9999	-1.35103	0.841035	1.05488	0.999982
Lmod1	-3.70711	0.159769	-1.91108	0.872766	-1.54618	0.999982
Shisa4	-1.42487	0.9999	-1.26344	0.999974	-1.43979	0.999982
Ipo9	-1.06095	0.9999	1.3489	0.993026	1.00333	0.999982
Gm28277	0	0	0	0	0	0
Nav1	-1.27927	0.9999	1.76463	0.227094	1.14834	0.999982
2610012C04Rik	0	0	0	0	0	0
Gm37333	0	0	0	0	0	0
Gm4793	0	0	0	0	0	0
Csrp1	3.01376	0.0154468	-1.06355	0.999974	1.26937	0.999982
Phlda3	13.6619	6.83303e-09	3.51868	0.0365152	3.12705	0.0795629
Tnni1	8.57959	0.9999	0	0	5.43126	0.999982
Lad1	-2.26468	0.240856	-3.48111	0.0145825	-3.78607	0.00938146
Tnnt2	-2.11907	0.9999	-3.06917	0.790021	1.8887	0.999982
Gm28883	0	0	0	0	0	0
Pkp1	-1.33133	0.9999	2.7195	0.632789	2.90889	0.79388
Gm36938	0	0	0	0	0	0
Igfn1	-1.08323	0.9999	0	0	43.3557	0.999982
Tmem9	-1.8079	0.519518	-1.525	0.701166	-1.02919	0.999982
Ascl5	-1.08311	0.9999	0	0	6.88979	0.999982
Cacna1s	-7.20445	0.0866652	-2.18167	0.999974	-1.73495	0.999982
Gm37014	0	0	0	0	0	0
Gm37759	0	0	0	0	0	0
Kif21b	1.09713	0.9999	3.04772	0.0103096	1.89413	0.580629
Mroh3	-1.08311	0.9999	0	0	3.97334	0.999982
5730559C18Rik	-1.52082	0.9999	2.04474	0.953255	1.57243	0.999982
Gm26568	0	0	0	0	0	0
Gm26781	0	0	0	0	0	0
Gpr25	-8.998	0.718151	1.83806	0.999974	-2.09081	0.999982
Camsap2	1.314	0.9999	1.25271	0.999974	1.71943	0.340534
Ddx59	1.1558	0.9999	-1.49866	0.842753	1.01725	0.999982
Kif14	-1.09275	0.9999	1.9396	0.97703	1.6858	0.999982
Gm29486	0	0	0	0	0	0
Gm29485	0	0	0	0	0	0
Zfp281	1.20741	0.9999	1.04376	0.999974	1.44926	0.946581
Gm8762	0	0	0	0	0	0
Gm29718	0	0	0	0	0	0
Gm17781	0	0	0	0	0	0
Nr5a2	1.63061	0.618498	-1.42163	0.777378	1.14839	0.999982
Gm37057	0	0	0	0	0	0
1700006P03Rik	0	0	0	0	0	0
Gm37903	0	0	0	0	0	0
Gm37099	0	0	0	0	0	0
Gm37293	0	0	0	0	0	0
Gm37298	0	0	0	0	0	0
Gm37124	0	0	0	0	0	0
A130050O07Rik	0	0	0	0	0	0
Gm26930	0	0	0	0	0	0
D130019J16Rik	0	0	0	0	0	0
Gm37534	0	0	0	0	0	0
Gm37632	0	0	0	0	0	0
Ptprc	3.15635	0.000342426	1.9394	0.0742502	2.29471	0.0276145
A130071D04Rik	0	0	0	0	0	0
Gm18667	0	0	0	0	0	0
1700113B19Rik	0	0	0	0	0	0
Atp6v1g3	-1.08311	0.9999	0	0	5.43138	0.999982
Gm28500	0	0	0	0	0	0
Nek7	-1.35256	0.9999	1.36421	0.999974	1.69025	0.948808
Gm28501	0	0	0	0	0	0
Gm37080	0	0	0	0	0	0
Gm37101	0	0	0	0	0	0
Gm8790	0	0	0	0	0	0
Lhx9	-9.14159	0.097181	-4.38485	0.689901	-1.08434	0.999982
2310009B15Rik	1.79585	0.792687	-1.14583	0.999974	-1.0312	0.999982
Gm3933	0	0	0	0	0	0
Gm37045	0	0	0	0	0	0
Dennd1b	1.93097	0.177858	1.75162	0.198725	1.63986	0.640535
4930596I21Rik	0	0	0	0	0	0
Gm18553	0	0	0	0	0	0
Gm16305	0	0	0	0	0	0
Gm37470	0	0	0	0	0	0
Gm43544	0	0	0	0	0	0
Gm37655	0	0	0	0	0	0
Gm16304	0	0	0	0	0	0
Gm37718	0	0	0	0	0	0
Crb1	-1.08311	0.9999	0	0	15.638	0.999982
Zbtb41	-1.00579	0.9999	-1.04233	0.999974	1.23438	0.999982
Aspm	-18.533	6.27806e-09	-25.8488	1.1692e-12	-35.9252	2.79685e-13
F13b	-1.59858	0.9999	-3.23734	0.0210761	-2.59668	0.227115
Cfhr1	-1.6287	0.907797	-2.50698	0.0679029	-1.63001	0.999982
Cfhr3	0	0	0	0	0	0
Gm4788	-1.32928	0.9999	-1.60012	0.796931	-1.05096	0.999982
Cfhr2	-2.37995	0.348195	-2.49272	0.2175	-1.46377	0.999982
Gm16332	0	0	0	0	0	0
Gm5837	0	0	0	0	0	0
Gm5834	0	0	0	0	0	0
Gm38266	0	0	0	0	0	0
Gm38019	0	0	0	0	0	0
Cfh	1.46826	0.9999	1.8434	0.516966	4.29424	0.00124209
Kcnt2	24.5038	4.16247e-09	33.3402	0	22.4862	1.33541e-08
Gm37777	0	0	0	0	0	0
4930590L20Rik	0	0	0	0	0	0
Gm37371	0	0	0	0	0	0
Gm4845	0	0	0	0	0	0
Gm37599	0	0	0	0	0	0
Gm37142	0	0	0	0	0	0
Gm37604	0	0	0	0	0	0
Gm18183	0	0	0	0	0	0
Gm28724_1	0	0	0	0	0	0
Gm28724_2	0	0	0	0	0	0
Gm37796	0	0	0	0	0	0
Gm5835	0	0	0	0	0	0
Cdc73	-1.28295	0.9999	1.15637	0.999974	-1.1138	0.999982
B3galt2	-24.1031	3.69995e-07	-87.2426	0.0422363	2.008	0.801754
Gm6397	0	0	0	0	0	0
Glrx2	-1.84718	0.233236	-1.68276	0.337474	-1.99113	0.173085
Trove2	-1.60205	0.787095	1.32177	0.999974	1.30423	0.999982
Uchl5	-1.85646	0.549354	-2.52335	0.0436456	-2.15554	0.376513
Gm29170	0	0	0	0	0	0
Rgs2	-1.58856	0.726868	1.36582	0.999974	4.9063	2.09236e-05
Rgs13	0	0	0	0	0	0
Rbm6-ps2	0	0	0	0	0	0
Rgs1	2.93288	0.13487	6.31096	0.000210122	5.34949	0.0029892
Gm7266	0	0	0	0	0	0
Rgs21	0	0	0	0	0	0
Rgs18	3.81127	0.91792	1.30728	0.999974	5.91885	0.720922
Gm8856	0	0	0	0	0	0
Gm6550	0	0	0	0	0	0
Gm5262	0	0	0	0	0	0
Gm28392	0	0	0	0	0	0
Gm38269	0	0	0	0	0	0
Gm29514	0	0	0	0	0	0
Gm5263	0	0	0	0	0	0
Gm38187	0	0	0	0	0	0
Brinp3	-1.08311	0.9999	0	0	8.34763	0.999982
Gm15583	0	0	0	0	0	0
Gm15584	0	0	0	0	0	0
Gm37749	0	0	0	0	0	0
Gm9931	0	0	0	0	0	0
Gm17867	0	0	0	0	0	0
Gm38284	0	0	0	0	0	0
Gm29516	0	0	0	0	0	0
Gm19891	0	0	0	0	0	0
Gm18505	0	0	0	0	0	0
Gm4034	0	0	0	0	0	0
Gm29022	0	0	0	0	0	0
Gm5703	0	0	0	0	0	0
Gm15443	0	0	0	0	0	0
Gm18751	0	0	0	0	0	0
Gm18701	0	0	0	0	0	0
Gm37630	0	0	0	0	0	0
Gm38189	0	0	0	0	0	0
Gm37096	0	0	0	0	0	0
Gm37775	0	0	0	0	0	0
Pla2g4a	2.45107	0.147174	3.21585	0.0212518	2.39707	0.215818
Gm19136	0	0	0	0	0	0
Ptgs2	55.4694	0.00194884	87.7969	6.26742e-06	217.683	4.96901e-06
Gm9687	0	0	0	0	0	0
Gm15453	0	0	0	0	0	0
Gm4322	0	0	0	0	0	0
Pdc	-1.08311	0.9999	0	0	3.97342	0.999982
2310030A07Rik	0	0	0	0	0	0
Gm37764	0	0	0	0	0	0
BC003331	-1.21996	0.9999	-1.03979	0.999974	1.30857	0.999982
Tpr	-1.09273	0.9999	-1.53315	0.507796	1.10772	0.999982
Prg4	-2.0013	0.49233	1.62723	0.667007	2.19687	0.442567
Ska2l-ps	0	0	0	0	0	0
Hmcn1	1.03331	0.9999	-1.51133	0.568758	-2.0642	0.0836569
Gm20631	0	0	0	0	0	0
Gm37671	0	0	0	0	0	0
Gm19087	0	0	0	0	0	0
Gm8941	0	0	0	0	0	0
Gm10138	0	0	0	0	0	0
Ivns1abp	1.50205	0.9999	2.2481	0.07348	1.03888	0.999982
Swt1	1.40726	0.767282	-1.45191	0.587783	-1.00497	0.999982
Trmt1l	3.143	0.00142311	1.49267	0.469911	-1.90459	0.266285
Gm37893	0	0	0	0	0	0
Rnf2	-1.06852	0.9999	-1.45643	0.830377	1.19115	0.999982
Gm36527	0	0	0	0	0	0
Gm29072	0	0	0	0	0	0
Gm19503	0	0	0	0	0	0
Fam129a	-1.61917	0.596845	-1.53104	0.526157	-1.05262	0.999982
Edem3	1.14769	0.9999	1.61147	0.515465	2.32269	0.151893
1700025G04Rik	-1.47709	0.818444	1.07958	0.999974	1.13478	0.999982
Gm28610	0	0	0	0	0	0
Gm8964	0	0	0	0	0	0
Gm38238	0	0	0	0	0	0
Tsen15	-1.02894	0.9999	-1.26669	0.999974	-1.28693	0.999982
Colgalt2	-7.44407	0.000492789	-6.62577	0.00639604	-4.09484	0.030894
Gm15618	0	0	0	0	0	0
Rgl1	1.0477	0.9999	1.24544	0.999974	-1.24094	0.999982
Gm15479	0	0	0	0	0	0
Gm7278	0	0	0	0	0	0
Gm28792	0	0	0	0	0	0
Apobec4	1.74644	0.9999	-4.05964	0.999974	-1.51284	0.999982
Arpc5	1.32622	0.9999	-1.46096	0.582989	1.21885	0.999982
Ncf2	2.62861	0.00944904	2.61047	0.00507851	4.09434	1.37939e-05
Smg7	2.66752	0.0179416	1.34534	0.921519	-1.00931	0.999982
Gm28791	0	0	0	0	0	0
1700040K01Rik	0	0	0	0	0	0
Gm8976	0	0	0	0	0	0
Nmnat2	2.5068	0.394055	1.12609	0.999974	-1.18189	0.999982
Gm28960	0	0	0	0	0	0
Lamc2	1.14605	0.9999	1.46864	0.999974	-1.14517	0.999982
Lamc1	1.30029	0.9999	1.514	0.446272	1.5143	0.89014
Gm38009	0	0	0	0	0	0
Gm8818	0	0	0	0	0	0
Shcbp1l	3.04361	0.9999	3.28571	0.999974	28.7608	0.999982
Gm37669	0	0	0	0	0	0
Dhx9	-1.03451	0.9999	1.18486	0.999974	1.11967	0.999982
Npl	-1.4887	0.9999	-1.18314	0.999974	1.24024	0.999982
Gm6652	0	0	0	0	0	0
Rgs8	2.09587	0.9999	-1.22526	0.999974	1.92753	0.999982
Gm29529	0	0	0	0	0	0
5530400K19Rik	0	0	0	0	0	0
Rgs16	2.30957	0.0447998	-4.27089	2.68809e-06	-9.30544	9.0519e-13
Gm28513	0	0	0	0	0	0
Rnasel	2.6405	0.0128378	2.38095	0.0259102	1.93628	0.244675
Gm28512	0	0	0	0	0	0
Rgsl1	9.33216	0.9999	3.3903	0.999974	14.0099	0.999982
Teddm2	-11.6229	0.000100514	-16.4398	0.00447149	-3.7733	0.089157
Teddm1b	20.4702	0.0274559	5.782	0.220844	1.43281	0.999982
Gm38352	0	0	0	0	0	0
Teddm1a	-4.18691	0.991328	-4.05964	0.999974	1.18032	0.999982
Glul	-1.32572	0.9999	-2.5651	0.0833196	-2.67043	0.202215
Zfp648	0	0	0	0	0	0
Gm18727	0	0	0	0	0	0
Cacna1e	3.60918	0.457159	2.55827	0.766238	-1.16065	0.999982
Gm29441	0	0	0	0	0	0
Ier5	3.78478	0.000172808	2.9473	0.00250953	3.34878	0.0010185
Mr1	-3.25392	0.004147	-2.88736	0.00878273	-1.85535	0.453603
Stx6	1.55071	0.576674	1.74702	0.207599	1.73635	0.38661
Gm8850	0	0	0	0	0	0
BC034090	1.57339	0.9999	2.42817	0.299272	-1.28805	0.999982
Gm37622	0	0	0	0	0	0
Xpr1	-2.28808	0.0424089	-1.17225	0.999974	1.10475	0.999982
Acbd6	1.20594	0.9999	-1.25739	0.999974	1.06988	0.999982
Lhx4	-1.08689	0.9999	0	0	27.1661	0.999982
Gm37089	0	0	0	0	0	0
Qsox1	1.89519	0.380734	2.15276	0.184257	3.92333	0.00121769
Gm37539	0	0	0	0	0	0
Gm37571	0	0	0	0	0	0
Cep350	2.26379	0.0858601	1.61731	0.474508	1.25296	0.999982
Gm38038	0	0	0	0	0	0
Gm36934	0	0	0	0	0	0
Gm37383	0	0	0	0	0	0
Gm9694	0	0	0	0	0	0
Tor1aip1	4.16535	0.000449478	1.13136	0.999974	-1.23941	0.999982
9430034N14Rik	0	0	0	0	0	0
Tor1aip2	2.53278	0.0670021	-1.31414	0.999974	1.14796	0.999982
Fam163a	-1.30567	0.9999	-1.16119	0.999974	-1.87387	0.999982
Gm38113	0	0	0	0	0	0
Tdrd5	5.16731	0.9999	1.9526	0.999974	8.34765	0.999982
A430050A11Rik	0	0	0	0	0	0
4930518J20Rik	0	0	0	0	0	0
Nphs2	-1.08311	0.9999	0	0	9.80566	0.999982
Axdnd1	-1.33487	0.9999	-1.2873	0.999974	2.40893	0.999982
Gm2000	-1.74456	0.738277	-3.67006	0.00461382	1.16169	0.999982
Soat1	-1.19511	0.9999	1.48076	0.708493	1.93088	0.200171
Gm37648	0	0	0	0	0	0
Gm10031	-3.25497	0.655995	-2.4262	0.734517	-4.2238	0.519959
Abl2	2.16777	0.0992446	2.41544	0.00802282	1.77359	0.491642
Gm38043	0	0	0	0	0	0
Tor3a	22.3255	0	2.90322	0.00400951	2.23626	0.166065
Fam20b	-1.02035	0.9999	-1.21899	0.999974	1.2237	0.999982
Gm19918	0	0	0	0	0	0
Gm15428	0	0	0	0	0	0
Ralgps2	-1.19873	0.9999	-1.44925	0.578999	-1.53928	0.623636
[truncated: 37,751 more rows]
