# Supplementary material for: Transcriptome change in Staphylococcus aureus in infecting mice
Source: Research Square preprint supplement (doi:10.21203/rs.3.rs-636230/v1), 2021-07-02
Supplement: Supplementary file 4 [file f2d6fbc8acee725cea986f6b.xlsx]

## Sheet: GO term enrichment analysis
Supplementari Dataset 3| Reactome analysis of genes upregulated or downregulated after S. aureus infection
Analysis Type:	PANTHER Overrepresentation Test (Released 20200728)
Annotation Version and Release Date:	Reactome version 65 Released 2019-12-22
Analyzed List:	upload_1 (Mus musculus)
Reference List:	Mus musculus (all genes in database)
Test Type:	FISHER
Correction:	FDR
Upregulate
6 h.p.i.								24 h.p.i.								48 h.p.i.
Reactome pathways	# of listed	# of upregulated	expected	Fold Enrichment	raw p-value	FDR p-value		Reactome pathways	# of listed	# of upregulated	expected	Fold Enrichment	raw p-value	FDR p-value		Reactome pathways	# of listed	# of upregulated	expected	Fold Enrichment	raw p-value	FDR p-value
Metal sequestration by antimicrobial proteins	4	4	0.11	35.06	3.75e-05	0.00269		Metal sequestration by antimicrobial proteins	4	4	0.09	44.62	1.49e-05	0.00307		Metal sequestration by antimicrobial proteins	4	4	0.07	54.3	6.96e-06	0.000765
Innate Immune System	1032	85	29.43	2.89	2.17e-17	1.79e-14		Innate Immune System	1032	62	23.13	2.68	7.34e-12	4.04e-09		Innate Immune System	1032	67	19	3.53	1.57e-18	1.3e-15
The NLRP3 inflammasome	10	4	0.29	14.03	0.00047	0.0204		Common Pathway of Fibrin Clot Formation	21	5	0.47	10.62	0.000223	0.0283		Regulation of TLR by endogenous ligand	18	8	0.33	24.14	1.25e-08	2.3e-06
Inflammasomes	14	4	0.4	10.02	0.00131	0.0452		Formation of Fibrin Clot (Clotting Cascade)	38	6	0.85	7.05	0.000375	0.0412		Toll-like Receptor Cascades	138	11	2.54	4.33	8.76e-05	0.00602
Nucleotide-binding domain, leucine rich repeat containing receptor (NLR) signaling pathways	47	10	1.34	7.46	3.34e-06	0.000459		Chemokine receptors bind chemokines	50	9	1.12	8.03	5.16e-06	0.00122		Common Pathway of Fibrin Clot Formation	21	6	0.39	15.52	7.23e-06	0.000745
Negative regulators of DDX58/IFIH1 signaling	14	4	0.4	10.02	0.00131	0.0442		Collagen degradation	57	7	1.28	5.48	0.000492	0.0478		Formation of Fibrin Clot (Clotting Cascade)	38	7	0.7	10	1.51e-05	0.00146
DDX58/IFIH1-mediated induction of interferon-alpha/beta	32	7	0.91	7.67	8.67e-05	0.00529		Degradation of the extracellular matrix	136	13	3.05	4.27	2.57e-05	0.00471		Formyl peptide receptors bind formyl peptides and many other ligands	14	4	0.26	15.52	0.000264	0.0155
Interleukin-20 family signaling	18	5	0.51	9.74	0.000359	0.0191		Cell surface interactions at the vascular wall	184	17	4.12	4.12	2.33e-06	0.000641		Peptide ligand-binding receptors	189	13	3.48	3.74	8.45e-05	0.00606
Signaling by Interleukins	260	34	7.42	4.59	2.21e-12	9.1e-10		Interleukin-1 family signaling	110	10	2.47	4.06	0.000316	0.0372		Class A/1 (Rhodopsin-like receptors)	311	18	5.73	3.14	3.46e-05	0.00317
Cytokine Signaling in Immune system	544	54	15.51	3.48	2.61e-14	1.44e-11		Signaling by Interleukins	260	21	5.83	3.6	1.18e-06	0.00039		GPCR ligand binding	399	18	7.35	2.45	0.000645	0.0332
Regulation of TLR by endogenous ligand	18	5	0.51	9.74	0.000359	0.0185		Cytokine Signaling in Immune system	544	29	12.19	2.38	3.24e-05	0.00534		GRB2:SOS provides linkage to MAPK signaling for Integrins	15	4	0.28	14.48	0.000329	0.0187
Toll-like Receptor Cascades	138	19	3.94	4.83	7.87e-08	2.16e-05		Toll-like Receptor Cascades	138	11	3.09	3.56	0.000459	0.0473		Platelet activation, signaling and aggregation	251	19	4.62	4.11	5.44e-07	8.97e-05
RIPK1-mediated regulated necrosis	19	5	0.54	9.23	0.000443	0.0221		Neutrophil degranulation	548	43	12.28	3.5	6.72e-12	5.54e-09		p130Cas linkage to MAPK signaling for integrins	15	4	0.28	14.48	0.000329	0.0181
Regulated Necrosis	19	5	0.54	9.23	0.000443	0.0215										IL-6-type cytokine receptor ligand interactions	17	4	0.31	12.78	0.000494	0.0263
ER-Phagosome pathway	40	10	1.14	8.77	9.46e-07	0.000156										Interleukin-6 family signaling	24	5	0.44	11.31	0.000157	0.0103
Antigen processing-Cross presentation	97	13	2.77	4.7	1.14e-05	0.00111										Signaling by Interleukins	260	18	4.79	3.76	3.53e-06	0.000448
Class I MHC mediated antigen processing & presentation	361	23	10.3	2.23	0.000722	0.0264										Cytokine Signaling in Immune system	544	29	10.02	2.89	7.23e-07	0.000108
Adaptive Immune System	780	41	22.25	1.84	0.000304	0.0173										Platelet degranulation	122	18	2.25	8.01	8.35e-11	2.75e-08
Chemokine receptors bind chemokines	50	12	1.43	8.42	1.13e-07	2.34e-05										Response to elevated platelet cytosolic Ca2+	127	18	2.34	7.7	1.51e-10	4.14e-08
Peptide ligand-binding receptors	189	15	5.39	2.78	0.000599	0.023										Chemokine receptors bind chemokines	50	7	0.92	7.6	7.28e-05	0.00572
Class A/1 (Rhodopsin-like receptors)	311	22	8.87	2.48	0.00025	0.0147										ROS and RNS production in phagocytes	36	5	0.66	7.54	0.000827	0.0413
ISG15 antiviral mechanism	31	7	0.88	7.92	7.28e-05	0.0048										Integrin cell surface interactions	81	11	1.49	7.37	8.55e-07	0.000117
Antiviral mechanism by IFN-stimulated genes	35	8	1	8.01	2.06e-05	0.00162										Iron uptake and transport	57	6	1.05	5.72	0.00096	0.0465
Interferon Signaling	72	11	2.05	5.36	1.81e-05	0.00149										Transport of bile salts and organic acids, metal ions and amine compounds	79	8	1.45	5.5	0.000179	0.0114
Endosomal/Vacuolar pathway	31	7	0.88	7.92	7.28e-05	0.00462										SLC-mediated transmembrane transport	238	14	4.38	3.19	0.000216	0.0132
Antigen Presentation: Folding, assembly and peptide loading of class I MHC	47	10	1.34	7.46	3.34e-06	0.000424										Neutrophil degranulation	548	46	10.09	4.56	9.48e-17	5.21e-14
NOD1/2 Signaling Pathway	33	6	0.94	6.38	0.000664	0.0249										Cell surface interactions at the vascular wall	184	15	3.39	4.43	3.69e-06	0.000434
Interleukin-1 signaling	96	15	2.74	5.48	4.35e-07	7.96e-05										Degradation of the extracellular matrix	136	11	2.5	4.39	7.75e-05	0.00581
Interleukin-1 family signaling	110	17	3.14	5.42	8.6e-08	2.03e-05
TRIF(TICAM1)-mediated TLR4 signaling	90	13	2.57	5.06	5.51e-06	0.000606
MyD88-independent TLR4 cascade	90	13	2.57	5.06	5.51e-06	0.000649
Toll Like Receptor 4 (TLR4) Cascade	109	15	3.11	4.83	1.83e-06	0.000274
TRAF6 mediated induction of NFkB and MAP kinases upon TLR7/8 or 9 activation	83	11	2.37	4.65	5.87e-05	0.00403
MyD88 dependent cascade initiated on endosome	84	12	2.4	5.01	1.39e-05	0.00121
Toll Like Receptor 7/8 (TLR7/8) Cascade	84	12	2.4	5.01	1.39e-05	0.00127
Toll Like Receptor 9 (TLR9) Cascade	88	12	2.51	4.78	2.12e-05	0.00159
Toll Like Receptor 3 (TLR3) Cascade	70	9	2	4.51	0.000335	0.0184
MyD88 cascade initiated on plasma membrane	73	9	2.08	4.32	0.000443	0.0209
Toll Like Receptor 5 (TLR5) Cascade	73	9	2.08	4.32	0.000443	0.0203
Toll Like Receptor 10 (TLR10) Cascade	73	9	2.08	4.32	0.000443	0.0197
DAP12 interactions	65	8	1.85	4.32	0.000921	0.0323
MyD88:MAL(TIRAP) cascade initiated on plasma membrane	74	9	2.11	4.26	0.000485	0.02
Toll Like Receptor TLR1:TLR2 Cascade	74	9	2.11	4.26	0.000485	0.019
Toll Like Receptor 2 (TLR2) Cascade	74	9	2.11	4.26	0.000485	0.0205
Toll Like Receptor TLR6:TLR2 Cascade	74	9	2.11	4.26	0.000485	0.0195
TNFR2 non-canonical NF-kB pathway	99	10	2.82	3.54	0.00091	0.0326
Neutrophil degranulation	548	49	15.63	3.14	1.42e-11	4.67e-09
Immunoregulatory interactions between a Lymphoid and a non-Lymphoid cell	187	14	5.33	2.63	0.00151	0.0499
Down regulate
6 h.p.i.								24 h.p.i.								48 h.p.i.
Reactome pathways	# of listed	# of downregulated	expected	Fold Enrichment	raw p-value	FDR p-value		Reactome pathways	# of listed	# of downregulated	expected	Fold Enrichment	raw p-value	FDR p-value		Reactome pathways	# of listed	# of downregulated	expected	Fold Enrichment	raw p-value	FDR p-value
Adrenoceptors (R-MMU-390696)	9	4	0.07	56.22	2.47e-06	0.00408		Aflatoxin activation and detoxification	22	9	0.3	29.86	2.07e-10	3.11e-08		Proline catabolism	3	3	0.04	76.51	4.13e-05	0.00296
Complex I biogenesis (R-MMU-6799198)	53	5	0.42	11.93	9.18e-05	0.0378		Biological oxidations	211	41	2.89	14.18	3.41e-32	2.81e-29		Metabolism of amino acids and derivatives	252	13	3.29	3.95	4.4e-05	0.0029
Respiratory electron transport, ATP synthesis by chemiosmotic coupling, and heat production by uncoupling proteins. (R-MMU-163200)	81	7	0.64	10.93	6.02e-06	0.00497		Synthesis of bile acids and bile salts via 27-hydroxycholesterol	18	7	0.25	28.39	3e-08	3.53e-06		Fructose biosynthesis	2	2	0.03	76.51	0.000978	0.0414
Respiratory electron transport (R-MMU-611105)	58	5	0.46	10.91	0.000136	0.045		Synthesis of bile acids and bile salts	37	8	0.51	15.78	1.42e-07	1.37e-05		Fructose metabolism	7	3	0.09	32.79	0.000238	0.0131
The citric acid (TCA) cycle and respiratory electron transport (R-MMU-1428517)	133	8	1.05	7.61	1.59e-05	0.00875		Bile acid and bile salt metabolism	45	9	0.62	14.6	4.17e-08	4.58e-06		Synthesis of bile acids and bile salts via 27-hydroxycholesterol	18	8	0.24	34.01	8.9e-10	1.33e-07
								Metabolism of steroids	128	17	1.75	9.7	1.33e-11	3.12e-09		Synthesis of bile acids and bile salts	37	10	0.48	20.68	3.72e-10	6.82e-08
								Metabolism of lipids	616	44	8.44	5.21	1.87e-18	7.7e-16		Bile acid and bile salt metabolism	45	12	0.59	20.4	7.15e-12	1.68e-09
								Vitamin C (ascorbate) metabolism	8	3	0.11	27.38	0.000372	0.0161		Metabolism of steroids	128	24	1.67	14.35	2.18e-19	9e-17
								Metabolism of vitamins and cofactors	184	13	2.52	5.16	3.04e-06	0.000201		Metabolism of lipids	616	43	8.05	5.34	1.78e-18	5.85e-16
								CYP2E1 reactions	12	4	0.16	24.33	5.23e-05	0.00262		Synthesis of bile acids and bile salts via 24-hydroxycholesterol	16	6	0.21	28.69	2.75e-07	2.83e-05
								Xenobiotics	28	10	0.38	26.07	5.93e-11	1.09e-08		Synthesis of bile acids and bile salts via 7alpha-hydroxycholesterol	27	10	0.35	28.34	2.8e-11	5.78e-09
								Cytochrome P450 - arranged by substrate type	73	16	1	16	6.07e-14	2e-11		Aflatoxin activation and detoxification	22	8	0.29	27.82	3.19e-09	4.05e-07
								Phase I - Functionalization of compounds	111	25	1.52	16.44	2.41e-21	1.33e-18		Biological oxidations	211	34	2.76	12.33	3.93e-25	3.24e-22
								HDL remodeling	9	3	0.12	24.33	0.000491	0.0208		CYP2E1 reactions	12	4	0.16	25.5	4.37e-05	0.003
								Plasma lipoprotein remodeling	25	6	0.34	17.52	3.21e-06	0.000204		Xenobiotics	28	9	0.37	24.59	7.93e-10	1.31e-07
								Plasma lipoprotein assembly, remodeling, and clearance	58	8	0.79	10.07	2.95e-06	0.000203		Cytochrome P450 - arranged by substrate type	73	15	0.95	15.72	4.34e-13	1.19e-10
								Miscellaneous substrates	25	8	0.34	23.36	1.05e-08	1.44e-06		Phase I - Functionalization of compounds	111	23	1.45	15.85	1.77e-19	9.76e-17
								Glucuronidation	22	7	0.3	23.23	9.29e-08	9.58e-06		Assembly of active LPL and LIPC lipase complexes	11	3	0.14	20.87	0.000696	0.0328
								Phase II - Conjugation of compounds	94	15	1.29	11.65	2.11e-11	4.34e-09		Plasma lipoprotein remodeling	25	4	0.33	12.24	0.0005	0.0242
								Synthesis of bile acids and bile salts via 24-hydroxycholesterol	16	5	0.22	22.81	7.43e-06	0.000423		Plasma lipoprotein assembly, remodeling, and clearance	58	7	0.76	9.23	2.03e-05	0.0016
								Chylomicron assembly	10	3	0.14	21.9	0.000632	0.0261		Miscellaneous substrates	25	6	0.33	18.36	2.46e-06	0.000225
								Plasma lipoprotein assembly	17	4	0.23	17.18	0.000163	0.00748		Fatty acids	22	5	0.29	17.39	2.21e-05	0.00166
								Chylomicron remodeling	10	3	0.14	21.9	0.000632	0.0254		RA biosynthesis pathway	21	4	0.27	14.57	0.000277	0.0147
								Synthesis of bile acids and bile salts via 7alpha-hydroxycholesterol	27	8	0.37	21.63	1.74e-08	2.21e-06		Signaling by Retinoic Acid	42	5	0.55	9.11	0.00034	0.017
								Fatty acids	22	6	0.3	19.91	1.7e-06	0.000134		Metabolism of steroid hormones	43	8	0.56	14.23	2.74e-07	3.02e-05
								Glucocorticoid biosynthesis	15	4	0.21	19.47	0.000108	0.00509		Glucuronidation	22	4	0.29	13.91	0.000324	0.0167
								Metabolism of steroid hormones	43	6	0.59	10.19	4.97e-05	0.00256		Phase II - Conjugation of compounds	94	10	1.23	8.14	9.82e-07	9.52e-05
								Reversible hydration of carbon dioxide	12	3	0.16	18.25	0.000986	0.0369		Peroxisomal lipid metabolism	29	5	0.38	13.19	7.07e-05	0.00432
								Synthesis of Prostaglandins (PG) and Thromboxanes (TX)	12	3	0.16	18.25	0.000986	0.0361		Fatty acid metabolism	172	14	2.25	6.23	1.47e-07	1.73e-05
								Arachidonic acid metabolism	57	8	0.78	10.25	2.62e-06	0.000197		Retinoid metabolism and transport	46	7	0.6	11.64	5.13e-06	0.000446
								Fatty acid metabolism	172	20	2.36	8.49	1.87e-12	5.14e-10		Metabolism of fat-soluble vitamins	51	7	0.67	10.5	9.48e-06	0.000782
								Heme degradation	13	3	0.18	16.85	0.0012	0.0431		Metabolism of vitamins and cofactors	184	10	2.4	4.16	0.000224	0.0127
								alpha-linolenic acid (ALA) metabolism	14	3	0.19	15.64	0.00144	0.0507		Visual phototransduction	93	8	1.22	6.58	4.99e-05	0.00317
								alpha-linolenic (omega3) and linoleic (omega6) acid metabolism	14	3	0.19	15.64	0.00144	0.0496		Endogenous sterols	28	4	0.37	10.93	0.000734	0.0336
								Glutathione conjugation	31	6	0.42	14.13	9.47e-06	0.000521		Plasma lipoprotein clearance	29	4	0.38	10.55	0.000827	0.0369
								Retinoid metabolism and transport	46	8	0.63	12.7	6.15e-07	5.64e-05		Glutathione conjugation	31	4	0.41	9.87	0.00104	0.0427
								Metabolism of fat-soluble vitamins	51	8	0.7	11.45	1.24e-06	0.000107		Respiratory electron transport, ATP synthesis by chemiosmotic coupling, and heat production by uncoupling proteins.	81	6	1.06	5.67	0.000922	0.04
								Visual phototransduction	93	8	1.27	6.28	6.91e-05	0.00335
								Complex I biogenesis	53	8	0.73	11.02	1.6e-06	0.000132
								Respiratory electron transport	58	8	0.79	10.07	2.95e-06	0.000212
								Respiratory electron transport, ATP synthesis by chemiosmotic coupling, and heat production by uncoupling proteins.	81	9	1.11	8.11	3.62e-06	0.000221
								The citric acid (TCA) cycle and respiratory electron transport	133	11	1.82	6.04	4.36e-06	0.000257
								Peroxisomal lipid metabolism	29	4	0.4	10.07	0.000982	0.0386
								Plasma lipoprotein clearance	29	4	0.4	10.07	0.000982	0.0377
								Metabolism of amino acids and derivatives	252	14	3.45	4.06	1.72e-05	0.000915
