# Supplementary material for: Transcriptome change in Staphylococcus aureus in infecting mice
Source: Research Square preprint supplement (doi:10.21203/rs.3.rs-636230/v1), 2021-07-02
Supplement: Supplementary file 5 [file f7616fa6abdd58ca81038e8e.xlsx]

## Sheet: Sheet1
Supplementary Dataset 1| in vivo RNA-Seq results of S. aureus in infected mouse liver
locus_tag	old_locus_tag	Gene	TSB medium		6 h.p.i.		24 h.p.i.		48 h.p.i.
			Average TPM	S.D.	Average TPM	S.D.	Average TPM	S.D.	Average TPM	S.D.
NWMN_RS00005	NWMN_0001	dnaA	167.497	15.5715	148.505	16.1839	226.022	38.2965	151.277	22.6609
NWMN_RS00010	NWMN_0002	dnaN	246.157	18.6977	198.815	32.2521	242.879	26.917	107.026	24.0899
NWMN_RS00015			190.25	3.4479	361.656	22.5371	339.219	32.1526	102.97	57.9187
NWMN_RS00020	NWMN_0003	recF	233.471	21.288	295.731	30.082	357.091	80.9465	153.609	37.0289
NWMN_RS00025	NWMN_0004	gyrB	220.908	26.0042	360.923	12.1861	364.309	69.1373	154.505	19.8935
NWMN_RS00030	NWMN_0005	gyrA	276.375	43.4569	399.478	53.3324	482.447	77.8261	119.37	14.0992
NWMN_RS00035	NWMN_0006	nnrD	105.664	6.30777	134.704	23.2189	225.759	16.0891	160.675	47.8703
NWMN_RS00040	NWMN_0007	hutH	14.8637	0.537338	118.155	23.4746	94.6783	33.7731	61.8242	31.0008
NWMN_RS00045	NWMN_0008	serS	176.255	11.483	47.568	3.17733	140.936	58.6941	283.44	43.259
NWMN_RS00050	NWMN_0009		28.3876	5.29108	4.40996	7.63827	31.9738	10.8627	74.2769	22.6944
NWMN_RS00055	NWMN_0010		24.6967	5.30582	0	0	4.87061	8.43614	27.544	9.90803
NWMN_RS00060	NWMN_0011		24.2725	1.14713	39.3739	9.33815	46.7424	9.34512	78.1651	36.1511
NWMN_RS00065	NWMN_0012		167.595	17.0047	99.9185	13.1055	86.995	15.5053	70.4396	14.6087
NWMN_RS00070	NWMN_0013		235.104	16.0058	282.511	34.8394	216.069	52.5959	165.625	12.6349
NWMN_RS00075	NWMN_0014	rplI	321.475	13.7661	324.742	103.023	231.579	76.152	172.311	28.2951
NWMN_RS00080	NWMN_0015	dnaB, dnaC	196.913	23.0693	185.634	4.77581	232.59	32.764	184.969	79.2367
NWMN_RS00085	NWMN_0016	purA	76.7476	6.53929	56.6484	3.01446	151.562	51.632	92.9312	15.8878
NWMN_RS00100	NWMN_0017	vicR, walR	125.967	26.481	151.33	6.30261	155.476	18.9952	179.582	28.0309
NWMN_RS00105	NWMN_0018	vicK, walK	116.65	17.9543	197.738	24.135	177.662	38.5922	122.732	22.0341
NWMN_RS00110	NWMN_0019		139.176	13.6537	233.38	32.5647	188.789	22.7339	150.466	26.0022
NWMN_RS00115	NWMN_0020		129.745	6.85668	252.571	37.6561	238.103	27.2534	121.83	13.4071
NWMN_RS00120	NWMN_0021		74.0657	6.86869	96.9468	11.0334	128.185	29.4578	38.7451	8.59263
NWMN_RS00125	NWMN_0022		41.4961	12.0396	21.8214	2.89657	136.116	69.8729	105.978	15.1688
NWMN_RS00130	NWMN_0023	orfX, rlmH	44.6776	6.73154	57.3031	3.26403	35.8577	16.6308	121.356	18.5962
NWMN_RS00135			29.1838	10.1255	0	0	0	0	6.47044	5.04266
NWMN_RS00140			29.9197	15.1814	18.6222	32.2546	0	0	13.2323	14.5431
NWMN_RS00145	NWMN_0024		41.7814	10.201	30.4678	5.58049	17.871	1.42125	15.9054	4.75627
NWMN_RS00150	NWMN_0025		41.3511	3.91897	79.8754	26.7398	52.2051	30.3792	17.365	4.14038
NWMN_RS00155			19.8036	4.63511	10.995	19.044	15.3245	26.5428	11.9051	12.3133
NWMN_RS00160	NWMN_0026		31.8149	3.49224	10.7582	9.80725	21.3727	7.91624	50.7057	27.5973
NWMN_RS00165			27.0412	3.26147	39.4518	40.744	36.1588	26.307	27.189	23.8642
NWMN_RS00170	NWMN_0027		10.0726	1.59166	26.1244	4.72459	25.5666	9.55887	14.8733	1.6373
NWMN_RS00175	NWMN_0028		15.5642	1.36766	37.2634	10.1342	28.6031	5.20087	36.7641	8.45499
NWMN_RS00180	NWMN_0029		30.2016	2.06605	52.0758	2.6349	76.4176	31.1115	29.3902	20.5589
NWMN_RS00185			28.9726	2.08254	11.0068	19.0644	0	0	7.65754	2.60169
NWMN_RS00190	NWMN_0030		106.417	14.7759	46.0142	4.63158	84.3553	27.7649	62.7896	12.7922
NWMN_RS00195			15.8422	4.94253	37.5574	6.0585	0	0	9.31367	7.38492
NWMN_RS00200	NWMN_0031		24.5914	2.01253	0	0	5.08507	8.8076	21.7534	7.77642
NWMN_RS00205	NWMN_0032		20.0599	3.21234	12.6089	11.0105	17.1561	3.66619	15.8868	9.00938
NWMN_RS00210	NWMN_0034		9.92739	0.758593	7.83714	13.5743	9.92527	8.86682	11.6117	3.4443
NWMN_RS00215	NWMN_0035		27.0812	4.28175	49.6226	22.0859	21.4134	5.88803	6.41711	0.841816
NWMN_RS00220	NWMN_0036		19.0886	4.6196	6.96755	12.0682	28.958	2.32446	7.19509	2.21655
NWMN_RS00225	NWMN_0037		17.2083	3.313	7.81285	13.5322	3.875	6.7117	8.29752	2.06934
NWMN_RS00230	NWMN_0038		31.1903	3.11656	18.3324	16.9497	27.4323	8.59367	24.0435	2.53911
NWMN_RS00235	NWMN_0039		23.7046	3.54436	24.434	0.650412	21.8926	2.481	29.1992	6.12102
NWMN_RS00240	NWMN_0040		35.4238	3.87352	37.0947	5.37584	45.0102	20.905	23.7567	8.55053
NWMN_RS00245	NWMN_0041	plc	21.1225	5.58723	4.75209	8.23087	37.6996	18.0189	117.502	27.2272
NWMN_RS00250	NWMN_0042		5.93566	0.958967	0	0	6.6586	11.533	32.5731	19.7537
NWMN_RS00255	NWMN_0043		7.9905	0.323774	0	0	3.83465	6.64181	38.5956	29.2228
NWMN_RS00260	NWMN_0044		12.4117	0.891025	0	0	16.4123	2.56029	71.8737	42.4847
NWMN_RS00265	NWMN_0045		15.7873	0.704332	11.0452	19.1308	24.6864	11.8522	51.965	33.9592
NWMN_RS00270	NWMN_0046		44.9532	4.68953	43.3904	7.69853	28.6517	2.95686	50.6622	21.8794
NWMN_RS00275	NWMN_0047		24.2364	2.26109	23.8341	3.42295	25.9389	2.91581	84.3018	40.5408
NWMN_RS00280	NWMN_0048		27.47	2.80393	27.8248	0.996209	22.6874	7.70564	139.06	9.11886
NWMN_RS00285	NWMN_0049		260.943	8.71174	91.0084	13.7629	110.693	37.9603	62.8835	22.0839
NWMN_RS00290	NWMN_0050		20.5957	1.2235	17.0231	4.01432	26.2772	3.8888	445.256	234.284
NWMN_RS00295	NWMN_0051		9.04389	1.16098	0	0	11.1589	9.75328	29.6105	16.148
NWMN_RS00300	NWMN_0052		16.719	3.13534	12.2733	10.7396	3.62688	6.28194	12.1548	1.5735
NWMN_RS00305	NWMN_0053		37.033	5.66304	6.5701	11.3798	7.73692	13.4007	74.1165	47.9025
NWMN_RS00310	NWMN_0054	lctP	202.731	41.8191	46.1663	6.89958	61.2776	21.2011	53.0435	22.9791
NWMN_RS00315	NWMN_0055	spa	47.9947	12.9265	37.4239	7.86609	349.865	377.469	2929.05	358.762
NWMN_RS00320	NWMN_0056	sarH1, sarS	226.348	58.9172	34.391	12.1727	45.1228	18.5947	48.0252	15.7005
NWMN_RS00325	NWMN_0057	sirC	65.1695	7.26808	31.4103	2.13358	76.7953	50.2815	81.3071	8.18021
NWMN_RS00330	NWMN_0058	sirB	19.8235	0.554091	20.4469	3.24335	72.2573	13.5421	59.9418	18.8022
NWMN_RS00335	NWMN_0059	sirA	39.9309	4.57776	8.1892	14.1841	186.503	118.674	422.361	85.0029
NWMN_RS00340	NWMN_0060	sbnA	5.99157	0.847687	12.8343	11.1161	90.0013	61.9883	27.0117	6.41678
NWMN_RS00345	NWMN_0061	sbnB	6.95564	0.533106	19.994	7.30209	118.349	89.7043	48.6883	15.0959
NWMN_RS00350	NWMN_0062	sbnC	5.96502	0.75777	24.3623	3.53122	92.2723	72.288	40.4219	13.4975
NWMN_RS00355	NWMN_0063	sbnD	11.4566	1.13855	19.2347	17.0607	95.6212	65.5886	109.287	49.9263
NWMN_RS00360	NWMN_0064	sbnE	8.7786	0.384989	17.633	1.04463	94.6641	77.8366	43.4211	15.2263
NWMN_RS00365	NWMN_0065	sbnF	10.0846	0.594178	19.4918	2.02689	97.5384	66.3687	33.7446	8.27312
NWMN_RS00370	NWMN_0066	sbnG	13.4572	1.47742	15.2054	13.45	110.936	76.1476	65.3294	16.2952
NWMN_RS00375	NWMN_0067	sbnH	13.7296	0.716652	25.2906	2.42242	90.0669	70.5701	51.1659	6.37599
NWMN_RS00380	NWMN_0068	sbnI	18.2339	0.760693	30.6403	7.80834	137.156	67.8456	70.4173	15.8083
NWMN_RS00385			8.7979	1.2611	0	0	0	0	6.75204	2.12292
NWMN_RS00390	NWMN_0069		22.7177	2.21372	7.11381	12.3215	0	0	19.2745	2.52781
NWMN_RS00395	NWMN_0070		28.2365	1.52512	0	0	18.0515	2.70758	24.0059	10.366
NWMN_RS00400	NWMN_0071	butA	47.0039	3.8635	1985.83	193.391	4713.73	1535.54	1659.3	638.614
NWMN_RS00405			3.19237	1.24691	0	0	0	0	6.69172	1.81428
NWMN_RS00410	NWMN_0072		6.34426	0.384808	0	0	11.215	11.2493	22.7475	6.26577
NWMN_RS00415	NWMN_0073		7.93538	0.814038	4.41535	7.64762	9.1893	8.21091	37.317	20.6273
NWMN_RS00420	NWMN_0074		10.6858	0.737264	0	0	12.3021	1.72421	28.7665	21.7825
NWMN_RS00425	NWMN_0075		13.1766	1.48134	4.08146	7.0693	12.8749	1.10406	20.1252	2.77549
NWMN_RS00430	NWMN_0076		19.8275	1.4096	12.1181	10.4954	18.2447	3.62654	15.4819	2.68183
NWMN_RS00435	NWMN_0077	sodM	103.023	30.5823	216.11	37.7374	254.955	44.3196	124.202	84.1962
NWMN_RS00440	NWMN_0078		79.0468	29.0527	104.562	41.9993	291.426	58.4923	173.349	56.5778
NWMN_RS00445	NWMN_0079		31.087	3.41378	67.39	15.0392	38.8957	15.7178	21.6993	7.30082
NWMN_RS00455	NWMN_0080	pnp	8.66222	1.48133	222.429	77.6036	119.074	45.6859	92.0147	69.8089
NWMN_RS00460	NWMN_0081		26.1918	1.32269	162.102	16.0013	97.556	36.9283	61.8682	45.97
NWMN_RS00465	NWMN_0082	dra	123.896	3.97633	587.508	67.9988	373.66	117.267	141.286	79.1126
NWMN_RS00470	NWMN_0083	drm, deoB	139.538	7.02832	512.808	23.1159	554.07	138.393	229.039	68.6473
NWMN_RS00475	NWMN_0084	phnE	14.0035	0.728844	11.6959	10.3761	9.05122	7.83876	48.532	30.742
NWMN_RS00480	NWMN_0085	phnE	9.22623	0.439974	11.3442	9.95591	19.7768	5.32411	14.1016	6.53749
NWMN_RS00485	NWMN_0086	phnC	9.935	0.564689	6.70885	11.6201	8.48429	7.4504	20.2607	2.88622
NWMN_RS00490			8.55588	0.744395	10.5686	9.73259	18.2583	6.01448	10.9947	3.29802
NWMN_RS00495	NWMN_0087		12.5589	0.613461	22.5226	11.7337	21.5483	3.3505	61.286	24.1811
NWMN_RS00500	NWMN_0088		23.3768	1.53226	38.7735	7.94616	40.5659	6.84446	27.5528	14.1449
NWMN_RS00505	NWMN_0089		2.69912	0.0805435	0	0	0	0	5.46049	3.28329
NWMN_RS00510	NWMN_0090		5.86403	1.12754	0	0	0	0	11.3523	7.73453
NWMN_RS00515	NWMN_0091		6.23862	0.913049	0	0	8.30477	14.3843	16.8706	7.91689
NWMN_RS00520			7.70642	2.55818	0	0	46.9253	29.0069	18.9085	9.99242
NWMN_RS00530	NWMN_0094	adhE	15.5137	1.28928	25.6666	7.24021	323.52	151.531	1356.16	134.092
NWMN_RS00535	NWMN_0095	capA, cap5A	14.5791	1.9313	9.17255	15.8873	57.6729	21.7728	82.0982	59.5643
NWMN_RS00540	NWMN_0096	capB	19.2063	2.20786	10.2754	17.7976	32.6266	24.8325	128.592	42.7377
NWMN_RS00545	NWMN_0097	capC	15.5517	2.34178	14.343	13.7266	35.261	17.699	100.721	54.1387
NWMN_RS00550	NWMN_0098	capD	17.1983	2.14658	27.2454	2.13361	36.668	12.9588	125.402	25.3145
NWMN_RS00555	NWMN_0099	capE	16.905	1.87558	15.6515	14.2716	26.5353	5.33095	100.62	48.794
NWMN_RS00560	NWMN_0100	capF, cap5F	15.8937	1.36963	28.2601	11.0267	28.7526	6.16278	63.385	55.2355
NWMN_RS00565	NWMN_0101	capG	14.9104	1.41405	22.71	4.15904	31.0895	11.4398	70.3273	12.1838
NWMN_RS00570	NWMN_0102	capH	11.5807	1.68166	12.3075	21.3172	28.935	7.09621	29.6989	22.4558
NWMN_RS00575	NWMN_0103	capI	14.0172	0.975457	23.0556	6.07209	21.3985	6.93364	30.813	25.4552
NWMN_RS00580	NWMN_0104	capJ	15.4148	1.59534	18.5128	4.68658	19.2789	4.76437	21.6988	4.29382
NWMN_RS00585	NWMN_0105	capK	13.3165	2.09215	6.22645	10.7845	17.4873	6.079	13.7335	5.81544
NWMN_RS00590	NWMN_0106	capL	17.8714	1.80713	27.0812	10.3128	31.5775	14.9875	20.8539	5.63374
NWMN_RS00595	NWMN_0107	capM	17.0232	1.72408	13.5043	11.8553	38.0297	19.4518	16.473	11.5882
NWMN_RS00600	NWMN_0108	capN	22.0668	1.76945	26.7484	10.6434	31.4699	2.75474	30.0687	12.9814
NWMN_RS00605	NWMN_0109	capO	25.4437	2.26271	32.6841	7.76136	30.1208	15.8474	80.3419	29.1574
NWMN_RS00610	NWMN_0110	capP	34.4218	2.47376	41.6112	7.8132	57.5763	20.0624	25.7896	9.66328
NWMN_RS00615	NWMN_0111	isdI	22.1604	1.07701	23.4128	5.94009	63.4331	26.79	128.145	69.3761
NWMN_RS00620	NWMN_0112		15.0687	1.45349	15.0704	13.0654	15.2813	13.5489	66.4327	43.275
NWMN_RS00625	NWMN_0113	aldA	17.4701	1.26023	637.257	105.967	250.763	76.9222	99.436	43.0389
NWMN_RS00630	NWMN_0114		27.1328	4.31364	20.8685	24.6773	17.9798	2.91391	35.6056	7.55266
NWMN_RS00635			32.7682	5.31325	0	0	0	0	21.8468	7.05005
NWMN_RS00640	NWMN_0115		391.481	165.52	19.4535	18.7355	12.6853	11.3666	12.0076	3.43539
NWMN_RS00645	NWMN_0116		62.8014	25.8813	0	0	8.61707	7.57003	95.7327	20.9781
NWMN_RS00650	NWMN_0117		56.3072	21.5217	10.7551	9.47833	19.8227	6.03698	38.2153	8.02329
NWMN_RS00655	NWMN_0118		56.51	20.6036	11.6083	10.1917	8.54395	7.50752	114.775	49.2013
NWMN_RS00660	NWMN_0119		64.8118	24.7029	19.8587	7.21205	20.8161	7.83643	46.1093	28.6986
NWMN_RS00665	NWMN_0120		193.624	54.9754	950.407	161.398	553.525	146.956	69.1156	43.9303
NWMN_RS00670	NWMN_0121	fdh	11.8391	2.42928	32.0792	11.8293	46.2625	18.2785	28.0536	15.2768
NWMN_RS00675	NWMN_0122		39.2621	8.57627	42.2246	14.7437	33.4165	13.1201	25.6617	5.94398
NWMN_RS00680	NWMN_0123	ausA	48.7758	8.01648	79.9945	6.183	79.4011	7.70014	105.904	22.6256
NWMN_RS00685	NWMN_0124		62.7537	5.69086	82.7418	33.6924	109.965	36.8588	73.3482	23.2993
NWMN_RS00690	NWMN_0125		35.9668	3.31852	55.1162	25.1744	94.1893	40.3962	230.604	7.30271
NWMN_RS00695	NWMN_0126	argB	17.484	1.42663	19.4558	0.686655	13.0682	11.3328	12.6949	2.68497
NWMN_RS00700	NWMN_0127	argJ	16.9822	1.22212	13.3294	11.8356	15.2687	1.15928	28.2552	15.4804
NWMN_RS00705	NWMN_0128	argC	13.1304	1.94492	13.1529	11.8258	11.0085	9.54956	17.9681	7.5463
NWMN_RS00710	NWMN_0129	argD	14.6117	0.433439	13.3903	11.6016	18.0789	6.7774	34.0054	24.0166
NWMN_RS00715	NWMN_0130	brnQ	71.8168	20.4098	24.7653	4.57393	46.7505	2.81295	64.2869	29.1394
NWMN_RS00720	NWMN_0131	entB	23.4162	1.88899	179.757	56.9632	45.2231	17.0268	32.1898	9.27442
NWMN_RS00725	NWMN_0132	ipdC	21.4417	3.09878	124.44	13.9367	76.8508	21.2803	37.93	9.90243
NWMN_RS00730			44.2729	5.43855	0	0	0	0	9.1162	1.63048
NWMN_RS00735	NWMN_0133	glcA	312.187	40.4802	102.168	13.4003	222.836	133.73	222.881	27.9902
NWMN_RS00740	NWMN_0134		10.3177	1.83831	44.2977	5.41699	26.8808	9.92087	224.556	49.3019
NWMN_RS00745	NWMN_0135	murQ	14.6102	3.23316	34.295	7.70706	23.8958	3.02565	356.613	136.209
NWMN_RS00750	NWMN_0136		16.0894	1.85422	27.5649	8.34031	36.0704	11.8419	352.136	65.4626
NWMN_RS00755	NWMN_0137		16.0196	0.468845	39.2091	16.2339	31.3582	13.7159	219.085	41.9044
NWMN_RS00760	NWMN_0138		11.1029	3.11143	0	0	5.29143	9.16502	12.0456	7.4225
NWMN_RS00765	NWMN_0139	hsdR	34.0368	2.78222	24.6108	6.89298	33.3386	7.40558	48.9242	5.02106
NWMN_RS00770	NWMN_0140		58.3298	15.4819	55.6306	13.7454	42.9491	9.8905	23.2788	6.63015
NWMN_RS00775	NWMN_0141		42.1281	10.8462	48.0387	13.3379	36.2377	4.69172	55.5364	27.289
NWMN_RS00780	NWMN_0142		26.8778	7.22863	40.6203	16.1507	39.1695	20.5809	34.5583	8.38382
NWMN_RS00785	NWMN_0143	oppF	40.6902	13.1092	35.0892	6.76513	50.7759	13.0611	19.3934	4.54196
NWMN_RS00790	NWMN_0144	oppB	14.6664	4.1434	9.65902	8.68343	16.2593	5.75502	13.5542	1.0387
NWMN_RS00795	NWMN_0145		11.6566	2.23817	0	0	20.2509	2.79762	21.7347	11.1903
NWMN_RS00800	NWMN_0146	rlp	13.4515	2.50091	17.9981	0.264746	23.8059	10.1699	31.2708	12.6128
NWMN_RS00805	NWMN_0147	ggt	23.7519	3.39467	21.0022	1.71666	28.3044	4.05729	38.9258	14.6771
NWMN_RS00810	NWMN_0148		24.7255	2.96934	11.4736	10.0739	11.6276	10.1739	19.425	7.59063
NWMN_RS00815	NWMN_0149	acpD, azoR	45.0811	4.02869	125.496	7.20302	114.09	25.2135	70.411	40.8445
NWMN_RS00820	NWMN_0150		18.0316	1.95351	116.755	24.0838	104.676	46.0231	32.4679	18.115
NWMN_RS00825	NWMN_0151	msmX	10.7975	1.82131	4.58281	7.93765	8.33446	7.22041	60.339	36.5078
NWMN_RS00830	NWMN_0152		10.3995	1.16321	12.1031	10.9159	14.595	1.44134	33.377	10.902
NWMN_RS00835	NWMN_0153		13.9637	2.0146	12.8249	11.2912	22.486	4.99231	35.5574	13.048
NWMN_RS00840	NWMN_0154		12.6992	1.46594	15.8625	13.7935	28.9555	12.3022	14.6588	5.86476
NWMN_RS00845	NWMN_0155		17.2858	1.83111	21.805	8.58206	30.9787	11.6697	45.4897	21.664
NWMN_RS00850			18.6778	1.56003	29.4046	6.88437	25.1601	7.74464	51.7832	19.4508
NWMN_RS00855	NWMN_0156		25.4353	1.75179	18.6359	17.379	52.9303	11.7172	23.4486	6.68492
NWMN_RS00860	NWMN_0157		685.555	31.4015	33.1295	9.64368	50.2947	13.6988	53.9534	26.6761
NWMN_RS00865	NWMN_0158	uhpT	12.8145	1.37863	46.6806	9.21514	52.886	12.0638	190.668	51.2578
NWMN_RS00870	NWMN_0159	hptS	28.2944	2.43747	25.664	12.3588	33.9793	9.50624	23.7863	3.30225
NWMN_RS00875	NWMN_0160	hptR	25.0186	2.92774	12.5652	10.882	14.3951	2.13709	22.081	2.91243
NWMN_RS00880	NWMN_0161	hptA	26.3769	2.97573	12.0736	10.5036	21.8584	12.2578	43.0292	8.47766
NWMN_RS00885	NWMN_0162	pflB	17.4817	1.31159	61.3204	12.9555	761.92	254.421	7942.35	983.41
NWMN_RS00890	NWMN_0163	pflA	17.0907	0.29951	61.7983	14.6638	921.291	278.938	6213.42	0
NWMN_RS00895			7.77976	0.77684	0	0	16.0774	14.8038	8.5221	9.12332
NWMN_RS00900	NWMN_0164		47.5469	7.0999	13.3434	11.6836	18.0439	2.15959	25.097	2.66362
NWMN_RS00905	NWMN_0165		363.475	31.6685	227.456	108.457	98.4172	84.3716	28.0609	16.0647
NWMN_RS00910	NWMN_0166	coa	426.089	855.533	84.8244	15.93	58.3389	35.2462	48.3795	20.0945
NWMN_RS00915			55.846	196.223	43.2103	41.8006	0	0	15.2438	7.47946
NWMN_RS00925	NWMN_0167	fadA	14.0022	0.426873	88.2052	4.3117	86.8048	12.2146	88.469	22.9166
NWMN_RS00930	NWMN_0168	fadB	7.5988	0.446539	61.5064	7.25755	38.746	10.8261	27.3097	5.10168
NWMN_RS00935	NWMN_0169	fadD	6.90667	0.352098	51.4908	17.155	35.7983	9.93645	43.6698	18.937
NWMN_RS00940	NWMN_0170	fadE	10.4641	0.710783	33.9122	5.48252	34.0272	4.11796	72.133	24.9094
NWMN_RS00945	NWMN_0171		7.85338	0.619371	54.9872	10.5419	17.4252	2.12522	38.4877	9.32497
NWMN_RS00950	NWMN_0172		45.585	12.2315	5.25184	9.09645	20.5082	8.27508	84.8776	26.0373
NWMN_RS00955	NWMN_0173		27.2868	1.06079	43.6963	5.95326	37.9702	8.63781	14.8031	3.64769
NWMN_RS00960	NWMN_0174		15.0224	1.66562	14.5277	13.7413	4.83317	8.37129	38.9977	15.8268
NWMN_RS00965			21.091	2.16435	0	0	31.0992	37.259	100.084	27.2451
NWMN_RS00970	NWMN_0175		43.6239	5.01756	63.5397	6.89173	135.282	103.459	280.148	114.365
NWMN_RS00975			1.95297	0.778368	0	0	10.5534	18.2791	1.59367	2.76031
NWMN_RS00980	NWMN_0176	lctE	32.7975	6.43839	67.1448	31.5357	2932.85	1684.78	3736.88	763.041
NWMN_RS00985			11.0215	1.25334	0	0	0	0	79.0964	54.7138
NWMN_RS00990	NWMN_0177	glcC	20.7796	0.354038	66.8153	17.8238	48.5724	8.97983	205.205	123.849
NWMN_RS00995	NWMN_0178		34.2737	2.80057	17.3177	2.42278	26.7294	7.81161	59.0664	21.4252
NWMN_RS01000			0.49515	0.245432	0	0	0	0	6.70686	10.0921
NWMN_RS01005	NWMN_0179		5.58719	0.251397	4.64015	8.03698	13.2969	0.747956	9.40372	2.05078
NWMN_RS01010	NWMN_0180		4.87215	0.211161	0	0	5.90485	10.2275	12.7345	6.73608
NWMN_RS01015	NWMN_0181		3.39772	1.35004	0	0	0	0	11.6998	7.96393
NWMN_RS01020	NWMN_0182	gatC	7.29487	1.10135	11.9307	10.3507	15.9961	4.39602	27.6788	7.11884
NWMN_RS01025	NWMN_0183	gutB	9.84376	0.306452	13.416	11.8982	8.55449	7.61628	41.891	27.3473
NWMN_RS01030			7.27439	0.662699	0	0	0	0	52.5157	35.2652
NWMN_RS01035	NWMN_0184		15.9162	1.58682	7.01006	12.1418	28.6839	5.18081	55.9854	17.6173
NWMN_RS01040	NWMN_0185	ispD, tarI	36.0278	10.3206	55.3899	10.4029	48.3622	11.0693	99.5887	45.361
NWMN_RS01045	NWMN_0186	tarJ	45.7689	14.3292	32.5088	9.38348	56.6387	21.1171	144.47	48.956
NWMN_RS01050	NWMN_0187		46.7035	12.0338	46.0903	8.1528	65.0898	16.4506	88.9287	8.32518
NWMN_RS01055	NWMN_0188	tagF	49.7086	3.01777	77.022	8.95776	48.1068	24.0024	18.2426	4.5801
NWMN_RS01060	NWMN_0189	ispD, tarI	120.221	7.2251	138.41	26.5003	93.1939	8.45356	53.3726	13.3913
NWMN_RS01065	NWMN_0190		157.482	7.22579	215.016	50.8972	162.58	29.9694	122.025	9.55641
NWMN_RS01070	NWMN_0191		202.96	16.3961	218.536	21.9987	153.949	36.4976	106.855	36.3074
NWMN_RS01075	NWMN_0192	tarS	267.361	38.1208	419.334	61.437	329.149	52.7972	145.735	15.835
NWMN_RS01080	NWMN_0193	scdA	28.5137	2.28256	24.2767	3.87258	82.9774	27.7474	502.45	47.148
NWMN_RS01085	NWMN_0194	lytS	144.082	31.772	44.2779	19.4287	122.175	52.6848	151.742	18.9549
NWMN_RS01090	NWMN_0195	lytR	146.306	32.8892	33.6313	10.3514	88.8518	16.3251	89.3223	26.9935
NWMN_RS01095	NWMN_0196	lrgA	41.8958	17.0587	41.2165	35.8772	172.144	107.853	989.478	514.848
NWMN_RS01100	NWMN_0197	lrgB	61.391	23.6073	73.7728	28.3497	351.78	58.2848	1563.84	588.705
NWMN_RS01105	NWMN_0198		57.9864	5.76892	101.045	8.59908	58.7651	26.0894	74.9378	14.5591
NWMN_RS01110	NWMN_0199		22.1522	2.1614	51.6786	20.2485	37.0432	7.3975	28.3291	12.2681
NWMN_RS01115	NWMN_0200	bglA	30.8978	2.2958	27.8881	6.53556	19.7575	3.70883	128.189	24.8021
NWMN_RS01125	NWMN_0201		21.8936	1.11025	13.1446	11.3998	55.8087	26.2197	322.336	104.069
NWMN_RS01130			3.26462	0.249952	0	0	0	0	4.7677	4.13633
NWMN_RS01135	NWMN_0202	rbsK	23.77	1.48415	49.9557	8.96788	36.2437	16.4257	72.337	30.678
NWMN_RS01140	NWMN_0203	rbsD	21.7837	2.45243	18.5612	20.3676	23.1065	12.0233	57.2376	14.4194
NWMN_RS01145	NWMN_0204	rbsU	21.0524	2.34045	23.4502	1.28051	36.2719	13.4657	89.0166	53.3745
NWMN_RS01150	NWMN_0205	rbsR	27.8045	2.22619	29.1386	11.033	31.5164	7.04641	65.7786	25.8877
NWMN_RS01160	NWMN_0206		19.8137	0.873335	12.8171	11.7168	16.017	17.271	9.00237	3.17948
NWMN_RS01165	NWMN_0207		14.5874	1.83524	7.90306	13.6885	0	0	9.41935	2.31185
NWMN_RS01170	NWMN_0208	norB	18.5733	1.48782	11.8328	10.6827	30.5673	1.9916	40.2078	16.5349
NWMN_RS01175	NWMN_0209		19.1779	0.174069	22.7803	10.0892	25.2266	5.54757	29.395	2.99132
NWMN_RS01180	NWMN_0210	lytM	56.7234	15.8199	103.82	23.1135	91.6731	16.1246	62.1431	21.9502
NWMN_RS01185	NWMN_0211		14.8176	0.488849	4.45425	7.71498	25.105	2.88236	17.8091	7.3838
NWMN_RS01190	NWMN_0212		15.4215	1.85854	17.5466	17.2855	13.2195	1.4657	8.97616	1.1833
NWMN_RS01195	NWMN_0213		11.2389	0.73966	7.2637	12.5811	5.81307	10.0685	12.1102	1.68213
NWMN_RS01200			2.87076	0.226598	10.4022	9.64886	5.41558	9.38006	8.93715	1.34478
NWMN_RS01205	NWMN_0216		7.45035	1.20572	0	0	13.387	2.27754	13.1551	5.23864
NWMN_RS01210	NWMN_0217		15.137	1.48206	14.612	15.1072	12.3456	11.0885	9.35044	3.92064
NWMN_RS01215	NWMN_0218		21.1422	1.94737	4.94694	8.56836	26.5964	8.83257	64.9287	15.0595
NWMN_RS01220	NWMN_0219	esxA	89.8354	14.2585	90.9821	14.5478	255.149	284.166	414.758	47.6893
NWMN_RS01225	NWMN_0220	esaA	8.55723	0.82273	16.1221	2.36078	21.5386	4.97728	16.1035	2.67421
NWMN_RS01230	NWMN_0221	essA	8.48514	2.64439	25.5362	7.90861	30.1025	4.2829	13.5236	8.29552
NWMN_RS01240	NWMN_0222	essB	6.28399	0.634036	4.95496	8.58225	12.0255	11.481	21.4122	11.8425
NWMN_RS01245	NWMN_0223	essC	8.48111	0.749501	16.2216	3.11009	18.1677	2.01876	19.6934	7.64562
NWMN_RS01250	NWMN_0224	esaC, esxC	11.7927	0.93472	0	0	14.2956	14.5401	50.7353	57.1474
NWMN_RS01255	NWMN_0225	esxB	13.4516	1.74651	8.36484	14.4883	12.7228	11.788	103.53	45.3307
NWMN_RS01260	NWMN_0226		8.64699	0.959837	14.7083	12.9484	4.08146	7.0693	17.3072	2.10087
NWMN_RS01265	NWMN_0227		10.2039	0.0748002	5.72967	9.92408	9.9202	8.59159	47.616	9.3155
NWMN_RS01270	NWMN_0228	essD	46.7586	4.39776	52.9922	3.87877	48.6395	9.55956	113.616	46.0996
NWMN_RS01275	NWMN_0229		221.707	36.9147	133.236	18.9596	104.691	47.2871	241.012	51.8418
NWMN_RS01280	NWMN_0230		17.2536	2.60216	4.43209	7.6766	5.2987	9.17762	11.6942	5.9713
NWMN_RS01285	NWMN_0231		22.1526	1.01128	12.5792	10.9874	7.89652	13.6772	13.2149	7.06288
NWMN_RS01290	NWMN_0232		35.6312	7.40468	0	0	48.1361	58.3007	13.462	3.32281
NWMN_RS01295	NWMN_0233		7.67173	0.626795	0	0	0	0	14.3041	7.43643
NWMN_RS01300	NWMN_0234		9.87223	1.01054	13.961	13.8664	0	0	12.3592	0.632094
NWMN_RS01305			17.5785	2.49047	0	0	22.6945	1.23179	51.4792	21.548
NWMN_RS01310	NWMN_0236		21.0635	2.37628	14.9042	12.9501	12.2848	12.1021	41.2136	12.6466
NWMN_RS01315	NWMN_0237		20.8032	4.42182	13.4729	11.682	28.6667	9.78731	11.5288	8.0557
NWMN_RS01320	NWMN_0238		11.1574	1.62651	12.4376	11.6691	4.18121	7.24207	49.6338	30.8257
NWMN_RS01325	NWMN_0239		11.9667	1.31973	7.03274	12.1811	7.38381	12.7891	36.6454	25.8027
NWMN_RS01330	NWMN_0240		14.009	1.61707	4.72864	8.19024	4.18475	7.2482	36.8972	27.8816
NWMN_RS01335	NWMN_0241		16.2024	1.46218	0	0	9.79464	8.74495	22.2486	13.1434
NWMN_RS01340	NWMN_0242		15.8107	0.347474	0	0	4.19513	7.26619	40.8365	38.907
NWMN_RS01345	NWMN_0243		19.4001	1.69121	11.8104	20.4562	11.1967	9.70654	89.449	27.0711
NWMN_RS01350	NWMN_0244		17.4641	0.903405	0	0	0	0	66.5212	38.9405
NWMN_RS01355	NWMN_0245		25.0172	3.84008	26.2795	2.75708	6.82927	11.8286	13.1126	3.22396
NWMN_RS01360	NWMN_0246	psiA	29.7444	1.6266	35.5776	6.96133	45.7695	27.0703	20.6617	18.3549
NWMN_RS01365	NWMN_0247		20.6426	2.78493	0	0	72.7537	45.2774	138.001	13.8442
NWMN_RS01370	NWMN_0248	brnQ	47.4751	5.7448	53.1808	15.4676	112.025	17.2899	112.078	43.6149
NWMN_RS01375	NWMN_0249		125.799	43.5383	25.0585	3.34605	158.834	92.2244	889.387	259.208
NWMN_RS01380			10.2047	1.24584	0	0	0	0	16.2128	3.84011
NWMN_RS01385	NWMN_0250		33.5248	4.80596	30.2386	7.09556	26.5893	9.07902	57.3749	40.1414
NWMN_RS01390	NWMN_0251		36.1918	5.91908	42.7922	7.30329	63.0673	25.3916	90.513	30.4294
NWMN_RS01395	NWMN_0252	pfoR	99.4171	16.5977	48.8094	12.6589	75.3029	12.763	121.215	60.8915
NWMN_RS01400	NWMN_0253		6.81628	1.56862	6.81155	11.798	8.67298	7.62907	130.52	73.9454
NWMN_RS01405	NWMN_0254	psuG	10.4334	0.914156	16.3245	14.8114	23.1961	2.92539	216.982	8.60545
NWMN_RS01410	NWMN_0255		7.44372	1.45448	24.7971	8.10838	23.6865	11.7011	86.4185	43.3391
NWMN_RS01415	NWMN_0256		8.25069	2.06943	108.331	22.5359	50.788	3.42915	147.252	14.195
NWMN_RS01420	NWMN_0257	nanA	6.78097	0.742284	113.661	31.1827	30.5731	11.6618	163.114	12.7165
NWMN_RS01425	NWMN_0258		19.196	0.32197	67.4007	18.8137	15.9752	4.05137	141.476	41.0727
NWMN_RS01430	NWMN_0259		19.2997	3.32889	43.5932	12.6064	42.024	16.9724	8.6145	8.01362
NWMN_RS01435	NWMN_0260	nanE	29.2472	2.66484	118.191	12.7352	109.795	17.2901	59.5868	26.1849
NWMN_RS01440	NWMN_0261		7.21615	1.54247	4.47725	7.75482	20.7269	6.22007	53.082	35.2081
NWMN_RS01445	NWMN_0262	geh	150.654	46.2835	70.2266	9.80705	143.007	45.2748	228.483	68.0441
NWMN_RS01450	NWMN_0263	int	45.2595	10.614	20.0779	2.49035	14.535	1.49986	23.1405	4.22266
NWMN_RS01455			42.7011	2.7654	12.0867	20.9349	23.7512	25.146	12.3099	6.38896
NWMN_RS01460	NWMN_0264		82.4137	21.8722	166.966	41.457	82.4116	29.8499	53.8416	20.5211
NWMN_RS01465	NWMN_0265		86.3857	28.4568	33.0368	10.3172	20.3928	17.8953	106.243	19.1263
NWMN_RS01470			104.649	25.1699	57.883	12.3725	41.7579	39.4482	128.863	37.5618
NWMN_RS01475			20.3754	290.176	0	0	53.2013	25.0762	45.4402	25.7864
NWMN_RS01480			23.6698	248.388	11.4668	19.8611	28.2821	32.9884	28.1709	11.2773
NWMN_RS01485	NWMN_0267		52.0257	162.142	39.4691	11.6555	29.4309	17.6811	14.0652	9.48587
NWMN_RS01490	NWMN_0268		23.203	255.172	16.5766	16.9181	13.5227	12.3469	36.9709	22.7384
NWMN_RS01495			20.0523	71.7992	22.5605	19.6378	26.4431	14.9031	31.7367	36.6093
NWMN_RS01500	NWMN_0269		0	0	16.8844	16.035	24.3221	21.0666	0	0
NWMN_RS01505			0	0	82.7049	99.2131	0	0	0	0
NWMN_RS01510	NWMN_0270		7.76023	70.5078	219.427	10.8317	132.349	124.439	17.1726	1.69811
NWMN_RS01515	NWMN_2615		12.5836	83.4958	216.404	25.5823	67.1183	33.1187	42.7862	28.7217
NWMN_RS01520	NWMN_0271		14.6076	110.465	327.643	6.58254	196.098	64.0893	72.0319	28.0484
NWMN_RS01525	NWMN_0272		12.0206	87.5752	189.015	16.7475	110.994	25.9844	51.8021	23.0044
NWMN_RS01530	NWMN_0273		11.9237	62.3886	154.884	17.3199	113.538	100.605	48.4408	19.6707
NWMN_RS01535	NWMN_0274		255.013	14.7518	160.154	36.6896	153.075	34.4844	225.815	53.1909
NWMN_RS01540	NWMN_0275		9.61885	46.4882	69.6301	70.256	131.304	33.9744	16.3746	6.55188
NWMN_RS01545	NWMN_0276		12.5092	54.53	109.508	10.4771	70.6442	0.247423	121.014	86.1422
NWMN_RS01550			10.5089	37.2005	27.1376	28.1939	75.5195	37.822	85.1897	60.8861
NWMN_RS01555			11.6254	46.6178	56.4416	15.2511	54.2047	11.2089	70.7173	73.3264
NWMN_RS01560	NWMN_0277		9.19172	35.4635	67.0635	16.8049	50.5482	5.62779	49.1564	15.5258
NWMN_RS01565			7.99844	34.2293	54.8891	17.1254	42.0556	38.8848	47.2052	36.4868
NWMN_RS01570	NWMN_0278		13.2671	41.7687	53.7119	20.2542	70.4924	37.9602	132.15	93.4773
NWMN_RS01575	NWMN_0279		13.1386	41.7329	50.8173	9.12229	27.3587	11.2213	111.635	80.3459
NWMN_RS01580	NWMN_0280		12.8884	41.6436	91.5414	47.2008	81.2016	11.359	92.1189	37.3128
NWMN_RS01585	NWMN_0281		10.2539	45.7005	48.5764	0.370386	72.3676	0.728935	81.4158	46.6542
NWMN_RS01590			8.50748	33.3793	27.9761	24.4463	39.8263	44.0794	53.8658	59.7882
NWMN_RS01595	NWMN_0282		13.0215	41.0313	33.0021	6.23143	49.9453	20.5104	138.385	99.6516
NWMN_RS01600	NWMN_0283		12.3289	38.0048	56.4455	20.52	32.7718	10.7213	99.9169	58.9605
NWMN_RS01605			10.7155	38.0277	29.9897	2.73271	25.9049	22.4397	107.326	56.9558
NWMN_RS01610	NWMN_0284		11.9594	36.0062	53.9925	5.52159	63.1767	38.3981	83.1474	50.7165
NWMN_RS01615			15.7885	75.8475	10.876	18.8377	6.28228	10.8812	157.295	78.4569
NWMN_RS01620			15.347	63.8249	0	0	0	0	102.784	117.149
NWMN_RS01625			16.6449	67.6961	12.5112	21.67	0	0	64.88	54.4719
NWMN_RS01630	NWMN_0285		18.2865	71.7945	0	0	23.5855	6.19894	30.1174	16.3667
NWMN_RS01635	NWMN_0286		19.7692	81.8778	0	0	12.7313	11.0302	26.2096	18.1329
NWMN_RS01640			19.0226	69.7894	17.5093	30.327	6.97777	12.0858	73.483	33.2227
NWMN_RS01645	NWMN_0287		22.6926	114.01	28.7706	25.4267	24.4069	21.3743	71.925	58.0492
NWMN_RS01650	NWMN_0288		20.1362	268.226	4.74702	8.22208	16.5765	6.55672	114.272	47.7915
NWMN_RS01655	NWMN_0289		19.4069	231.526	5.82106	10.0824	16.0925	2.56655	76.7703	32.1744
NWMN_RS01660	NWMN_0290		22.5816	256.746	26.1539	14.277	25.9959	6.47049	23.8617	8.55194
NWMN_RS01665	NWMN_0291		19.3512	233.717	37.9441	12.4438	48.9809	7.01522	30.4656	14.275
NWMN_RS01670			14.6635	160.954	17.4456	15.9421	19.6155	17.0486	27.7524	16.1881
NWMN_RS01675	NWMN_0293		32.1971	544.553	12.7865	11.1589	9.61634	8.54629	15.1295	4.83839
NWMN_RS01680	NWMN_0294		34.5899	551.712	16.4523	14.921	12.5685	10.9611	32.097	15.5507
NWMN_RS01685	NWMN_0295		33.9495	515.606	5.45747	9.45262	45.9222	32.1344	30.5445	29.0766
NWMN_RS01690	NWMN_0296		32.157	500.613	15.136	26.2163	17.9328	16.2642	28.4047	7.89187
NWMN_RS01695	NWMN_0297		35.3905	478.69	22.809	21.7153	45.4728	23.8007	129.46	71.7639
NWMN_RS01700	NWMN_0298		26.4541	425.147	7.47429	12.9458	40.9772	43.5152	35.2371	29.3313
NWMN_RS01705	NWMN_0299		26.525	421.548	21.8566	8.7333	49.3842	27.9635	25.7384	14.2623
NWMN_RS01710	NWMN_0300		18.7475	197.303	11.735	20.3257	11.1498	9.66587	106.67	68.9245
NWMN_RS01715			15.4009	142.119	0	0	0	0	24.3335	18.6955
NWMN_RS01720	NWMN_0302		22.2028	155.025	26.5928	5.08419	23.724	5.91074	92.5434	34.5004
NWMN_RS01725	NWMN_0303		11.7811	99.8521	12.8592	12.0905	12.3496	11.3585	10.362	1.31102
NWMN_RS01730	NWMN_0304		11.4182	106.788	18.1606	1.59777	16.4304	3.47202	32.8967	19.7749
NWMN_RS01735	NWMN_0305		13.7197	87.2279	5.97567	10.3502	19.71	7.97175	34.5685	35.289
NWMN_RS01740	NWMN_0306		14.1574	115.936	25.5241	3.87664	37.5143	5.77016	148.785	88.2311
NWMN_RS01745	NWMN_0307		10.416	81.2716	13.4625	23.3178	46.072	24.3707	159.409	93.2228
NWMN_RS01750			2.09795	29.1118	0	0	39.7981	10.8429	38.6998	33.804
NWMN_RS01755	NWMN_0308		2.35414	30.4288	19.4884	33.7549	37.2722	19.6684	49.6298	38.618
NWMN_RS01760	NWMN_0309		6.36218	32.6031	37.8206	6.66515	25.6985	5.13815	92.4236	44.4815
NWMN_RS01765	NWMN_0310		15.6416	157.241	14.0914	12.2195	47.3863	13.2102	169.978	95.5515
NWMN_RS01770	NWMN_0311		17.503	154.49	34.0545	12.7741	46.7527	6.60019	67.7711	78.7852
NWMN_RS01775	NWMN_0312		5.63298	39.9584	0	0	11.2958	19.565	9.13893	3.25672
NWMN_RS01780	NWMN_0313	ytA	7.3751	55.0451	16.8973	15.748	15.8655	5.10585	32.0954	14.6855
NWMN_RS01790	NWMN_0314		57.8941	5.96829	42.0331	20.7274	40.7392	8.6241	19.6132	9.15967
NWMN_RS01795	NWMN_0315		35.8024	2.63007	21.947	6.93173	19.1474	7.74321	33.4117	20.8776
NWMN_RS01800			1.6204	2.84551	0	0	0	0	39.4341	58.3238
NWMN_RS01805	NWMN_0316		24.1226	0.650841	21.3086	21.1827	33.4909	1.4371	69.3258	32.5446
NWMN_RS01810	NWMN_0317		27.5125	0.090924	22.0666	19.6922	32.4095	10.6695	170.601	50.7903
NWMN_RS01815	NWMN_0318		25.9182	1.26719	20.9417	3.98808	34.3732	18.6762	71.5636	17.0362
NWMN_RS01820	NWMN_0319		26.1152	0.729835	21.6344	5.8949	27.2117	2.02123	50.0723	17.7119
NWMN_RS01825	NWMN_0320		26.1084	0.366168	34.449	13.6809	39.43	22.5226	27.7852	2.84043
NWMN_RS01830	NWMN_0321		64.9431	4.88638	72.9615	18.1319	79.6274	42.443	154.044	91.6456
NWMN_RS01835	NWMN_0322	ulaA	15.7031	0.449792	47.1051	4.65094	34.1827	14.6308	67.083	12.4592
NWMN_RS01840	NWMN_0323		11.8051	0.903314	29.3196	10.5909	28.8606	30.9054	70.5223	26.5503
NWMN_RS01845	NWMN_0324		9.24995	0.44096	13.1828	12.4159	16.3066	18.0092	17.0604	6.93083
NWMN_RS01850	NWMN_0325		10.9476	0.327538	41.6669	12.7781	31.6813	7.43541	14.6877	4.61341
NWMN_RS01855	NWMN_0326		73.9766	9.59015	68.5798	17.0374	92.7483	42.6728	35.4262	23.3475
NWMN_RS01860	NWMN_0327		13.7199	1.25641	17.3373	17.5089	16.8803	3.4117	15.2993	3.30075
NWMN_RS01865	NWMN_0328		27.0989	3.89792	16.9202	15.4042	39.3826	17.9977	12.8284	11.1698
NWMN_RS01870	NWMN_0329	glpT	25.9902	1.94226	45.6208	9.2805	25.173	9.77199	97.8764	28.2024
NWMN_RS01875	NWMN_0330		17.5023	0.37955	63.9156	0.920122	42.1639	19.8208	48.6694	13.1987
NWMN_RS01880	NWMN_0331		21.8065	1.18044	98.1538	1.60919	65.2741	10.5474	78.666	27.6728
NWMN_RS01885	NWMN_0332		20.633	1.34472	88.4721	11.3864	100.153	49.6353	38.3273	27.3815
NWMN_RS01890	NWMN_0333		55.0632	4.487	14.9592	12.982	25.2885	2.00673	34.9423	10.1797
NWMN_RS01895			7.45913	0.285566	6.02708	10.4392	5.25184	9.09645	11.8228	5.50418
NWMN_RS01900	NWMN_0335		32.7683	10.9567	28.3371	2.74128	36.7539	6.37602	29.5718	18.552
NWMN_RS01905	NWMN_0336	fepA	10.3659	1.95096	5.01726	8.69015	4.43805	7.68693	20.2037	10.0973
NWMN_RS01910	NWMN_0337	fepB	13.4585	1.41343	11.285	9.91207	15.7693	2.52193	57.6606	22.3392
NWMN_RS01915	NWMN_0338	fepC	12.0179	0.675984	13.6541	11.9917	22.8621	8.72408	24.3755	9.91864
NWMN_RS01920	NWMN_0339	tatC	36.6699	4.83271	8.88586	15.3908	15.4443	14.7461	40.5729	26.3434
NWMN_RS01925	NWMN_0340	tatA	37.0276	4.28266	0	0	5.88586	10.1946	45.8827	22.9615
NWMN_RS01930	NWMN_0341		45.3429	6.43705	25.9902	22.5095	20.505	24.4963	17.3231	14.8307
NWMN_RS01935			43.997	6.08417	17.6242	30.526	34.7227	35.6521	31.1198	35.4931
NWMN_RS01940	NWMN_0342		49.4714	2.80928	36.037	16.1974	12.1144	10.7659	31.2516	5.12646
NWMN_RS01945	NWMN_0343		54.5969	4.69905	66.0577	11.8585	39.751	25.259	14.2234	3.33153
NWMN_RS01950	NWMN_0344		102.36	10.4581	64.497	17.4083	98.4301	58.8821	109.702	53.9652
NWMN_RS01955	NWMN_0345	ltrA	44.3699	7.02126	13.0647	11.3378	16.272	3.51137	34.8574	18.771
NWMN_RS01965	NWMN_0346		145.444	5.18327	287.645	13.8549	180.653	26.5783	176.584	42.5854
NWMN_RS01970	NWMN_0347		41.8413	2.74374	54.6483	21.9643	99.2092	38.6842	99.5115	42.4203
NWMN_RS01975	NWMN_0348	metE	17.9495	1.39911	23.3796	3.56939	53.82	17.1201	35.5734	23.5068
NWMN_RS01980	NWMN_0349	metH	13.6458	1.15218	14.3383	12.4787	33.8172	12.3885	37.0043	37.6321
NWMN_RS01985	NWMN_0350		11.7457	1.17321	9.8842	8.92223	44.7941	14.8357	47.9074	34.4256
NWMN_RS01990	NWMN_0351		10.2688	0.562259	25.2912	7.94256	21.1038	1.15511	35.4344	23.9931
NWMN_RS01995	NWMN_0353		46.8422	8.61125	20.2341	17.5353	23.5212	8.72259	32.6787	11.7603
NWMN_RS02000	NWMN_0354		86.2885	3.09102	54.2984	18.7711	19.0639	19.7825	31.1032	6.57875
NWMN_RS02005			123.215	1.3933	53.558	19.9488	41.4096	7.30664	109.256	89.3155
NWMN_RS02010	NWMN_0355	ychF	207.574	11.2398	80.556	24.1509	63.5867	10.6963	141.363	32.1761
NWMN_RS02015	NWMN_0356		28.573	71.7086	835.344	257.833	879.041	139.844	58.9764	16.2498
NWMN_RS02020	NWMN_0357	rpsF	3874.3	151.946	860.894	235.699	792.493	11.0652	768.041	131.948
NWMN_RS02025	NWMN_0358	ssb	3652.69	111.75	1173.24	131.281	1462.41	34.8314	853.097	158.751
NWMN_RS02030	NWMN_0359	rpsR	1553.66	110.437	1445.73	257.729	1601.71	159.101	266.456	68.1145
NWMN_RS02035	NWMN_0360		11.407	1.00521	8.02249	13.8954	8.63975	7.68911	10.7925	2.84187
NWMN_RS02045			9.0893	0.962043	0	0	13.2621	22.9707	17.0945	11.4432
NWMN_RS02050	NWMN_0362		150.443	37.7206	267.709	50.6995	1042.79	656.929	226.232	121.17
NWMN_RS02055	NWMN_0363		24.6657	4.08361	0	0	25.9285	24.9653	7.8889	0.568196
NWMN_RS02060	NWMN_0364		636.878	160.379	102.669	23.2421	143.634	66.179	728.67	550.171
NWMN_RS02065	NWMN_0365		130.829	34.1922	297.242	130.843	437.394	158.39	20.3059	12.5765
NWMN_RS02070	NWMN_0366		888.502	62.9409	173.497	72.7188	416.932	279.671	1126.3	622.19
NWMN_RS02075			15.3139	2.34515	0	0	6.10446	10.5732	7.23477	2.43297
NWMN_RS02080	NWMN_0367		44.9136	5.39976	23.2137	2.36578	20.4599	10.5727	25.7548	5.77436
NWMN_RS02085	NWMN_0368		43.9797	6.11311	5.20379	9.01323	0	0	73.7255	46.1645
NWMN_RS02090	NWMN_0369		87.5653	5.8904	61.8559	15.6549	50.5146	27.1962	71.1408	38.6913
NWMN_RS02095	NWMN_0370		49.1822	7.47757	22.3105	20.7621	21.814	11.0055	27.8122	9.29728
NWMN_RS02100	NWMN_0371	ahpF	509.793	62.3986	4039.28	647.454	2520	962.168	1404.46	179.294
NWMN_RS02105	NWMN_0372	ahpC	632.459	82.3872	6077.49	1778.5	2897.77	1071.71	1829.52	506.29
NWMN_RS02110	NWMN_0373		46.8848	4.84177	366.496	35.3895	182.5	43.3366	71.3198	11.8159
NWMN_RS02115	NWMN_0374		100.863	26.9185	34.5595	9.71033	109.168	20.5973	38.9568	6.68171
NWMN_RS02120			8.01506	1.69411	0	0	11.0068	19.0644	8.12305	8.47336
NWMN_RS02125	NWMN_0375		280.122	10.1025	288.511	21.4022	256.36	54.9483	119.404	7.07783
NWMN_RS02130	NWMN_0376		62.1664	7.53853	79.8675	7.69069	73.9773	22.2077	47.0186	22.5547
NWMN_RS02135	NWMN_0377		75.9999	7.17462	362.703	59.7395	334.204	173.681	548.131	286.98
NWMN_RS02140	NWMN_0378	xprT, xpt	397.841	69.014	22.9665	3.04639	102.973	28.5635	95.071	64.0398
NWMN_RS02145	NWMN_0379	pbuX	414.885	78.3283	41.1673	12.3425	114.689	13.8148	199.576	121.554
NWMN_RS02150	NWMN_0380	guaB	585.384	79.4996	94.6764	13.0635	214.67	25.4653	275.594	128.885
NWMN_RS02155	NWMN_0381	guaA	646.948	93.9487	185.256	1.50438	326.786	48.4734	217.934	71.2173
NWMN_RS02160	NWMN_0382		16.1498	2.1296	21.1177	18.9356	13.9074	12.0485	27.0671	12.6749
NWMN_RS02165	NWMN_0383		17.6108	4.05112	4.40192	7.62434	4.86038	8.41842	11.2375	1.20107
NWMN_RS02170	NWMN_0384	tnp	8.92654	3.76762	0	0	0	0	10.2383	4.75739
NWMN_RS02175			11.5984	2.42649	0	0	0	0	13.2123	9.92317
NWMN_RS02180	NWMN_0386		15.3739	1.20743	33.5875	8.76566	29.9743	17.514	49.3171	19.3969
NWMN_RS02185	NWMN_0387		14.1153	2.34748	48.6211	10.4333	35.3098	8.22012	23.9482	5.42736
NWMN_RS02190	NWMN_0388	set16	17.6042	1.62929	103.335	26.5103	820.431	576.372	529.53	86.654
NWMN_RS02195	NWMN_0389	set7	30.9189	6.01834	68.211	34.8671	262.806	235.453	93.3024	46.3445
NWMN_RS02200	NWMN_0390	set18	10.7681	0.617764	34.6506	17.9809	137.196	87.6458	97.2532	78.1404
NWMN_RS02205			4.54601	0.833578	0	0	0	0	18.782	10.5159
NWMN_RS02210	NWMN_0391	set19	13.9258	1.29967	29.3001	9.74896	138.69	128.416	156.635	85.2712
NWMN_RS02215	NWMN_0392	set10	7.08245	1.48392	19.0788	17.1745	105.057	102.107	38.0418	6.65332
NWMN_RS02220			3.70658	0.937133	0	0	0	0	12.3386	7.8885
NWMN_RS02225	NWMN_0393	set21	9.14809	1.07255	42.2215	22.8492	156.152	100.927	61.6063	13.3215
NWMN_RS02230	NWMN_0394	set11	24.6877	2.87078	40.4168	11.2148	214.525	160.683	197.653	78.0284
NWMN_RS02235	NWMN_0395	set12	14.3509	3.16539	56.7406	14.9834	118.375	77.093	42.7608	28.2094
NWMN_RS02240	NWMN_0396	set13	12.8346	1.37927	53.3845	10.6307	268.597	206.454	88.4607	45.0253
NWMN_RS02245	NWMN_0397	set10nm	23.6072	2.2769	62.8434	6.39156	170.711	120.235	121.258	27.2894
NWMN_RS02250			8.46838	0.293974	0	0	0	0	91.3524	90.1914
NWMN_RS02255	NWMN_0398	hsdM	64.6322	6.97945	24.9473	2.78749	39.39	18.9734	42.71	11.9881
NWMN_RS02260	NWMN_0399	hsdS	52.4746	2.59895	24.7903	2.98982	26.972	7.74683	22.4178	10.3509
NWMN_RS02265	NWMN_0400	set11nm	138.561	62.0233	0	0	16.3238	28.2736	10.6455	1.53458
NWMN_RS02270	NWMN_0401		181.144	145.129	31.3052	13.8593	32.168	18.1833	29.142	3.16447
NWMN_RS02275	NWMN_0402		875.195	85.0413	6419.5	931.672	3211.1	1248.59	1586.19	435.254
NWMN_RS02280	NWMN_0403	lpl1	6.22853	0.79176	0	0	3.99939	6.92715	12.724	5.64529
NWMN_RS02285	NWMN_0404	lpl2nm	8.33501	0.356281	4.28934	7.42936	16.9301	1.53268	23.0619	4.30415
NWMN_RS02290			8.53675	0.643158	0	0	22.0279	10.3989	24.289	0.768599
NWMN_RS02295	NWMN_0406	lpl3nm	2.86886	0.0942693	10.9413	10.0907	8.52506	7.43256	8.63382	3.83804
NWMN_RS02300	NWMN_0407	lpl11	5.66227	0.955344	7.32347	12.6846	13.1648	11.9739	29.0258	9.79866
NWMN_RS02305	NWMN_0408	lpl3	6.52089	0.368347	5.15028	8.92054	4.56662	7.90962	21.9513	8.41972
NWMN_RS02310	NWMN_0409	lpl13	8.65942	0.706069	6.26805	10.8566	4.64015	8.03698	43.7692	14.3818
NWMN_RS02315	NWMN_0410	lpl14	11.1555	0.631798	17.5102	15.1913	8.49313	7.40092	32.7366	17.8277
NWMN_RS02320	NWMN_0411	lpl8	13.9722	0.821576	15.1029	13.3509	12.8314	11.1173	22.5033	6.42156
NWMN_RS02325	NWMN_0412	lpl10	36.1517	3.85005	45.7898	8.87304	14.8593	12.8717	30.8988	11.0763
NWMN_RS02330	NWMN_0413		38.9326	3.42616	58.8486	5.72763	35.5489	15.2281	26.8014	3.01532
NWMN_RS02335	NWMN_0414		43.4747	0.361891	51.4872	13.7296	22.4845	23.6686	63.2927	21.1413
NWMN_RS02340	NWMN_0415		43.5849	2.23611	34.806	30.6122	22.0597	1.43479	78.3677	38.3223
NWMN_RS02345	NWMN_0416		30.3672	4.35137	0	0	5.30436	9.18742	13.0507	3.62903
NWMN_RS02350	NWMN_0417	cobW	42.7523	14.2635	24.9746	3.05135	25.3799	15.9775	30.2951	12.7443
NWMN_RS02355			116.009	56.8224	0	0	0	0	46.0296	38.6729
NWMN_RS02360	NWMN_0418	ndhF	60.9899	4.62424	11.2056	10.3784	15.0927	3.33095	49.3651	15.1945
NWMN_RS02365	NWMN_0419		66.4026	4.20118	31.4331	3.24142	35.0717	7.53057	32.9148	12.2733
NWMN_RS02370	NWMN_0420		117.007	10.5568	74.7928	20.1634	92.2103	33.8848	39.5299	2.71079
NWMN_RS02380	NWMN_0421		70.7334	6.62634	47.5937	21.3959	38.5373	20.9988	27.7468	4.58276
NWMN_RS02385	NWMN_0422		96.7034	5.83801	79.8717	6.07856	76.7004	2.07468	57.7377	26.9684
NWMN_RS02390			19.8701	3.31172	0	0	0	0	195.875	149.769
NWMN_RS02395	NWMN_0423		77.3145	13.5909	33.4293	11.0807	78.511	19.0992	43.2473	27.051
NWMN_RS02400	NWMN_0424	cysM	33.778	11.0184	19.5695	16.949	26.3145	14.6819	63.4316	33.5705
NWMN_RS02405	NWMN_0425	metB	42.4632	18.0385	31.6799	8.77801	28.9471	12.4919	19.8361	11.5809
NWMN_RS02410	NWMN_0426		16.3881	4.88361	19.8518	4.81109	38.4208	19.0633	47.2684	22.5118
NWMN_RS02415	NWMN_0427		12.9073	2.03981	12.6717	12.3275	35.8584	4.08943	21.6222	5.29664
NWMN_RS02420	NWMN_0428		25.7359	3.37991	31.8465	18.2701	52.2685	16.8068	43.88	35.267
NWMN_RS02425	NWMN_0429		54.6184	13.5587	109.806	17.3666	228.769	162.66	943.066	355.103
NWMN_RS02430	NWMN_0430		83.7591	5.76836	98.7845	8.40947	100.317	44.0533	30.9275	11.1442
NWMN_RS02435	NWMN_0431		37.3997	5.57602	51.8389	25.3182	49.8995	14.6871	52.3982	24.5557
NWMN_RS02440	NWMN_0432		50.3018	5.0489	89.4754	20.3415	80.8912	8.50015	68.3148	16.3099
NWMN_RS02445	NWMN_0433		52.7488	6.27862	36.8066	16.0843	54.8789	17.0435	26.1332	8.30097
NWMN_RS02450	NWMN_0434		38.3168	3.62827	34.8973	7.92871	39.4464	5.5032	12.7588	3.99905
NWMN_RS02455	NWMN_0435	gltC	14.7554	2.8378	0	0	4.95496	8.58225	17.0589	9.33448
NWMN_RS02460	NWMN_0436	gltB	20.2284	3.77244	27.2018	5.80095	94.4979	26.2463	81.9459	33.1614
NWMN_RS02465	NWMN_0437	gltD	29.5046	3.97858	63.3835	5.37343	114.4	31.8248	52.4675	14.1348
NWMN_RS02475	NWMN_0438	treP	41.2679	2.78374	59.6981	23.2471	45.0978	18.1628	112.92	41.8417
NWMN_RS02480	NWMN_0439	treC, agl	26.4001	0.23259	30.0665	8.73577	30.0397	9.32897	35.9433	4.605
NWMN_RS02485	NWMN_0440	treR	31.2588	0.93318	34.8866	6.21444	51.7511	5.16493	43.6948	15.616
NWMN_RS02490			3.03628	2.26492	43.0679	37.771	36.6555	39.6984	10.8165	13.4657
NWMN_RS02495	NWMN_0441		33.0175	3.94565	34.3649	16.9068	19.5702	5.09585	36.6294	22.6177
NWMN_RS02500	NWMN_0442	dnaX	113.048	11.474	98.1541	5.46176	108.967	13.894	85.7253	8.43484
NWMN_RS02505	NWMN_0443		689.975	74.6373	267.384	108.935	409.097	179.986	719.635	81.6908
NWMN_RS02510	NWMN_0444	recR	507.321	37.3629	272.843	74.6159	386.441	79.0834	223.997	65.1853
NWMN_RS02515			10.4646	0.905186	0	0	11.3283	19.6213	39.6137	37.5886
NWMN_RS02535	NWMN_0445	tmk	23.6583	0.684681	17.676	4.77503	15.6408	2.337	16.4271	4.38971
NWMN_RS02540	NWMN_0446	tmk	55.7811	5.65702	18.1886	15.8846	29.8624	13.3801	22.2343	13.1145
NWMN_RS02545	NWMN_0447		343.449	2.17971	345.18	134.041	511.933	38.7147	350.559	15.5779
NWMN_RS02555	NWMN_0448	holB	87.6506	6.94486	38.2815	7.96824	37.7066	8.37022	20.6799	9.42575
NWMN_RS02560	NWMN_0449		81.9826	5.85343	53.9541	9.26906	56.3278	25.8475	63.1677	24.6098
NWMN_RS02565	NWMN_0450		78.2834	1.70774	70.8694	14.7407	106.576	47.8472	40.8462	15.8787
NWMN_RS02570	NWMN_0451		29.4871	1.12599	14.1776	12.4066	33.3626	9.2829	25.6943	15.2645
NWMN_RS02575			37.3854	0.729754	9.71503	16.8269	5.62412	9.74127	38.9487	23.0132
NWMN_RS02580	NWMN_0452	rsmI	42.3243	1.57547	26.2404	8.37829	30.5828	12.5687	35.6418	0.939827
NWMN_RS02590	NWMN_0453	metS	228.215	15.1823	93.1833	17.7599	133.523	33.5142	73.2022	29.0897
NWMN_RS02595	NWMN_0454		256.286	13.0929	181.109	26.4281	182.064	7.04344	105.593	20.6867
NWMN_RS02600	NWMN_0455	rnmV	69.055	10.4583	10.7114	18.5527	21.0625	4.1754	89.7186	46.2131
NWMN_RS02605	NWMN_0456	ksgA, rsma	66.7763	7.08709	20.6224	1.26092	20.8967	5.24565	51.1237	8.48734
NWMN_RS02610	NWMN_0457	veg	371.142	51.2616	513.587	39.8297	441.837	55.385	1461.87	364.963
NWMN_RS02615	NWMN_0458	ipk	119.926	15.8721	67.9188	3.68127	108.627	4.73435	97.2259	23.1732
NWMN_RS02620	NWMN_0459	purR	173.568	3.37416	173.607	14.1208	181.638	48.9182	208.561	10.0659
NWMN_RS02625	NWMN_0460		399.1	39.099	442.396	19.1466	444.727	79.5327	650.174	295.279
NWMN_RS02630	NWMN_0461	spoVG	370.506	36.0575	769.631	128.871	632.748	107.597	504.665	297.836
NWMN_RS02635			1.7313	0.347404	0	0	0	0	4.59197	2.22029
NWMN_RS02640	NWMN_0462	glmU	248.488	6.40386	247.67	13.83	137.892	11.1398	255.428	59.865
NWMN_RS02645	NWMN_0463	prs	319.978	25.5866	469.313	9.91245	246.928	45.2882	296.137	27.2082
NWMN_RS02650			2546.41	447.468	0	0	14.3823	24.9108	524.798	185.583
NWMN_RS02655	NWMN_0464	rplY	4789.7	300.254	6621.19	818.286	3581.91	1162.79	894.77	77.5275
NWMN_RS02660	NWMN_0465	pth	81.5135	15.2869	75.1668	27.2089	54.0807	6.43119	86.2202	12.2095
NWMN_RS02665	NWMN_0466	mfd	84.8788	9.21763	51.3985	2.75755	58.721	5.49135	37.8254	9.11649
NWMN_RS02670	NWMN_0467		82.0235	11.6588	49.8569	3.28258	42.1816	11.3784	47.7099	7.33405
NWMN_RS02675	NWMN_0468		124.701	14.8967	115.764	15.7689	88.0195	9.28983	106.46	24.6723
NWMN_RS02680			132.005	17.8851	52.9046	21.5689	67.2922	18.6669	88.1707	17.6283
NWMN_RS02685	NWMN_0469	divIC	167.713	14.446	113.545	32.374	145.118	38.7224	160.758	66.2007
NWMN_RS02690	NWMN_0470		676.36	58.5546	406.137	98.9981	617.601	40.2927	267.852	19.4001
NWMN_RS02695	NWMN_0471	tilS	118.063	6.31078	21.4835	7.64793	25.7082	7.46075	23.2577	12.4604
NWMN_RS02700	NWMN_0472	hpt	211.746	18.5699	43.4704	17.783	58.6022	10.6156	80.1897	51.1245
NWMN_RS02705	NWMN_0473	ftsH	596.129	39.493	629.071	43.3014	506.295	123.403	288.246	59.4933
NWMN_RS02710	NWMN_0474	hslO	143.129	12.0543	105.256	21.9522	77.6736	16.3776	127.461	49.4792
NWMN_RS02715	NWMN_0475	cysK	1199.13	324.151	331.065	11.5828	551.543	150.774	299.972	105.848
NWMN_RS02720	NWMN_0476	folP	42.7167	4.92447	29.8919	13.2294	27.1093	21.9645	97.4335	42.6129
NWMN_RS02725	NWMN_0477	folB	62.8248	8.05916	26.87	28.6357	13.6829	11.855	90.3063	88.7163
NWMN_RS02730	NWMN_0478	folK	144.173	17.1673	95.9852	11.9479	76.314	44.689	71.6876	27.2457
NWMN_RS02735			143.552	17.0223	32.809	31.6521	11.3449	19.65	33.253	21.5528
NWMN_RS02740	NWMN_0479	lysS	337.06	27.353	316.169	26.9206	327.595	104.69	162.617	42.2397
NWMN_RS02810	NWMN_0480		25.6634	3.92369	15.8151	3.23104	17.0497	4.75942	11.552	2.36865
NWMN_RS02815	NWMN_0481	pdxS	798.075	151.041	64.0667	24.4464	81.5474	15.6741	120.641	59.5412
NWMN_RS02820	NWMN_0482	pdxT	677.73	109.638	64.9637	33.622	106.557	18.8785	130.717	61.9822
NWMN_RS02825	NWMN_0483	nupC	174.925	15.9278	42.5878	2.85737	80.6249	17.5914	375.384	68.3562
NWMN_RS02830	NWMN_0484	ctsR	67.3286	7.06544	573.753	26.039	589.57	136.097	116.355	59.391
NWMN_RS02835	NWMN_0485		65.183	5.90691	928.528	138.977	808.254	310.518	155.608	32.345
NWMN_RS02840	NWMN_0486	mcsB	64.5286	4.7256	749.225	69.9545	731.147	294.98	124.734	80.7153
NWMN_RS02845	NWMN_0487	clpC	104.896	4.77693	1190.74	81.3686	1778.67	370.004	234.659	43.6434
NWMN_RS02855	NWMN_0488	radA	98.1965	4.22715	125.448	8.88085	124.486	21.4392	174.166	30.8555
NWMN_RS02860	NWMN_0489		108.598	14.0655	114.811	1.9484	80.6766	19.5752	68.1467	19.558
NWMN_RS02865	NWMN_0490	gltX	315.46	20.6332	185.828	40.5112	135.254	20.8883	72.4251	10.116
NWMN_RS02870	NWMN_0491	cysE	70.527	6.21819	60.3924	22.9951	29.862	18.5447	118.265	11.3348
NWMN_RS02875	NWMN_0492	cysS	83.2378	6.18996	61.5121	6.73785	40.7233	8.11261	77.5612	11.1531
NWMN_RS02880	NWMN_0493	mrnC	76.013	4.17797	31.9209	6.53361	47.7223	14.4154	46.2016	30.6758
NWMN_RS02885	NWMN_0494		79.6742	2.79311	52.8015	11.254	53.8595	10.0624	88.8331	27.8554
NWMN_RS02890	NWMN_0495		95.6909	1.48991	16.9272	14.7471	53.6924	28.2611	66.873	23.3816
NWMN_RS02895	NWMN_0496	sigH	73.5454	3.76837	6.03768	10.4576	12.0052	10.4983	28.2314	10.1521
NWMN_RS02900	NWMN_0497	secE	187.14	3.35565	66.0554	22.575	49.6341	0.436364	60.8689	56.6481
NWMN_RS02905	NWMN_0498	nusG	367.462	55.7121	327.989	95.592	235.057	55.5538	278.263	36.292
NWMN_RS02910	NWMN_0499	rplK	4053.87	1302.24	1492.07	92.2045	1120.81	10.6004	937.912	81.189
NWMN_RS02915	NWMN_0500	rplA	3377.35	905.132	1349.46	212.57	1114.89	113.176	629.299	200.629
NWMN_RS02920	NWMN_0501	rplJ	6213.42	2149.51	740.056	83.0781	1007.82	198.026	1043.65	63.9521
NWMN_RS02925	NWMN_0502	rplL	4571.3	1662.12	742.909	101.758	941.23	322.739	852.233	218.298
NWMN_RS02930	NWMN_0503		134.459	6.28649	35.7061	8.78933	46.3822	7.21405	27.2578	12.8646
NWMN_RS02935	NWMN_0504	rpoB	700.052	60.953	820.538	118.029	720.8	212.284	319.32	14.7678
NWMN_RS02940	NWMN_0505	rpoC	738.096	77.4667	1267.99	31.4737	1262.48	149.011	336.169	17.7882
NWMN_RS02945	NWMN_0506		2880.54	387.286	919.666	210.812	1061.44	264.627	594.7	39.2784
NWMN_RS02950	NWMN_0507	rpsL	5702.89	821.56	1078.08	203.348	1266.58	362.896	1297.65	81.7711
NWMN_RS02955	NWMN_0508	rpsG	4722.72	382.29	979.137	184.273	1552.94	290.609	1136.63	163.314
NWMN_RS02960	NWMN_0509	fus, fusA	5523.29	311.075	1330.29	174.569	2168.38	458.007	1610.81	210.223
NWMN_RS02965	NWMN_0510	tuf	9599.06	993.879	4133.47	1032.37	3514.7	307.583	3384.08	346.47
NWMN_RS02970	NWMN_0511		46.6371	5.51509	47.9129	5.55447	38.4692	10.0978	31.7652	9.34142
NWMN_RS02975	NWMN_0512		73.2454	6.81238	171.49	21.9595	100.004	12.6303	149.095	32.4217
NWMN_RS02980	NWMN_0513	hchA	567.572	57.7704	342.249	87.8526	342.717	44.0824	203.83	101.895
NWMN_RS02985	NWMN_0514	araB	20.961	1.9654	29.3057	3.2482	24.1505	3.47386	35.9853	8.74818
NWMN_RS02990	NWMN_0515	capD	62.7691	8.97338	289.444	28.0049	177.698	63.0822	137.428	34.0197
NWMN_RS02995	NWMN_0516	ilvE	134.392	17.9724	176.499	34.5268	267.17	65.6544	154.829	49.1427
NWMN_RS03000	NWMN_0517		60.6736	11.0594	39.3825	19.8518	60.2215	39.3095	42.3273	25.9228
NWMN_RS03005	NWMN_0518		123.669	8.10596	37.0859	18.5088	45.2553	12.5208	37.5411	20.0006
NWMN_RS03010	NWMN_0519		70.281	17.2727	15.474	13.5566	5.38097	9.32011	7.71605	1.83315
NWMN_RS03015	NWMN_0520	tadA	0	0	16.463	14.2729	23.1134	5.81821	25.5786	26.1169
NWMN_RS03020	NWMN_0521		105.937	10.965	85.7123	31.819	40.9294	1.90675	51.5244	25.1093
NWMN_RS03025	NWMN_0522		118.258	13.0965	138.568	19.8232	80.3918	12.1564	51.0364	10.5272
NWMN_RS03030	NWMN_0523	sdrC	6.27526	0.624829	23.3362	3.43553	80.3712	73.5406	163.474	153.529
NWMN_RS03035	NWMN_0524	sdrD	6.36666	0.840518	19.4908	1.43931	32.1946	23.1749	147.835	169.472
NWMN_RS03040	NWMN_0525	sdrE	23.0318	10.5537	29.0826	4.49458	25.0128	1.70939	51.8762	22.0327
NWMN_RS03045	NWMN_0526	sdgA	39.8059	5.80009	28.1183	4.86807	28.9417	5.12434	26.2177	11.1687
NWMN_RS03050	NWMN_0527	sdgB	41.6135	4.14554	51.363	12.9175	51.5496	6.6037	51.8891	31.7091
NWMN_RS03055	NWMN_0529	folE2	159.023	8.35985	357.326	41.4461	256.743	88.7075	53.5667	14.074
NWMN_RS03060	NWMN_0530	(hdvA)	148.929	4.45084	254.319	23.6284	150.431	65.4734	38.6265	26.6065
NWMN_RS03065	NWMN_0531	hdvB, dbp	166.292	13.6809	203.571	58.9677	107.813	36.3394	50.0355	10.2602
NWMN_RS03070	NWMN_0532	nagB	43.6895	4.07973	67.7004	20.797	54.7859	26.825	62.0336	27.4868
NWMN_RS03075	NWMN_0533		371.159	47.9333	218.719	18.2463	201.535	68.368	288.382	136.437
NWMN_RS03080	NWMN_0534		351.854	47.1008	330.498	22.1036	315.714	20.6266	230.331	83.0612
NWMN_RS03085	NWMN_0535		29.9157	4.72696	4.48977	7.7765	30.0067	8.40671	40.2688	17.6704
NWMN_RS03090	NWMN_0536	proP	48.2138	28.4672	62.5643	12.992	64.0301	24.0762	35.8603	28.5226
NWMN_RS03095	NWMN_0538	vraA	15.2653	0.933569	11.7186	11.0196	13.911	0.816573	10.4852	3.17949
NWMN_RS03100	NWMN_0539	vraB	26.6242	2.61042	5.25766	9.10654	25.6924	7.84594	59.8454	22.1356
NWMN_RS03105	NWMN_0540	vraC	23.3745	1.71577	11.951	20.6997	6.73128	11.6589	30.5019	22.3959
NWMN_RS03110	NWMN_0541		25.3469	1.65768	22.3319	24.4818	27.6177	20.1441	27.9057	28.3385
NWMN_RS03115	NWMN_0542		102.33	28.5976	12954.7	3298.23	11613.6	1452.45	4266.57	995.973
NWMN_RS03120	NWMN_0543	thiD	180.223	32.1238	119.762	20.2999	129.409	12.6785	186.059	66.9982
NWMN_RS03125	NWMN_0544	ung	88.1412	5.86446	32.3943	10.2839	40.3791	23.1231	31.5017	10.2324
NWMN_RS03130	NWMN_0545		112.402	10.9238	46.8889	28.7934	33.3553	23.0292	50.7344	4.85068
NWMN_RS03135	NWMN_0546		72.5166	2.96413	27.4072	30.0278	39.3952	27.7145	40.9744	21.5145
NWMN_RS03140	NWMN_0547		302.067	47.2601	44.4584	12.8233	61.6513	29.3565	116.866	10.6066
NWMN_RS03145	NWMN_0548		49.8704	4.57651	34.2941	20.8062	38.3789	14.0752	28.7261	14.9575
NWMN_RS03150	NWMN_0549		52.2108	7.15255	23.1203	9.19266	20.9176	3.75745	26.3898	10.0302
NWMN_RS03155	NWMN_0550		265.778	40.972	129.757	16.832	107.964	30.3779	201.618	20.8503
NWMN_RS03160	NWMN_0551	eutD	309.547	14.7504	343.99	30.3803	271.737	54.2849	348.235	30.6055
NWMN_RS03165	NWMN_0552	lipL	308.837	20.8958	282.701	33.4471	281.188	59.3346	270.759	42.7917
NWMN_RS03170	NWMN_0553	mvaK1	76.8541	6.95236	79.0027	10.8406	70.7819	8.47098	55.4818	22.2376
NWMN_RS03175	NWMN_0554	mvaD	101.928	9.8149	91.9243	26.2528	86.3458	16.8645	74.5402	21.9325
NWMN_RS03180	NWMN_0555	mvaK2	118.274	11.6598	65.0745	2.71371	80.0923	27.9065	41.9912	17.3745
NWMN_RS03185	NWMN_0556		86.3601	6.40542	84.7243	33.0407	83.7741	38.8778	68.0583	25.7694
NWMN_RS03190	NWMN_0557		47.5531	10.8868	133.74	29.12	134.782	38.0316	37.7262	22.9013
NWMN_RS03195	NWMN_0558		35.9511	8.30659	78.5882	9.48006	64.0168	27.7191	13.815	5.09113
NWMN_RS03200			0.250199	0.292919	0	0	0	0	3.14486	3.42103
NWMN_RS03205	NWMN_0559		33.9141	2.50434	27.0717	8.70275	23.5419	4.23303	41.4343	8.9555
NWMN_RS03210	NWMN_0560		23.7402	8.15288	0	0	13.1839	11.473	10.6387	2.51452
NWMN_RS03215	NWMN_0561		24.2579	6.14865	5.71097	9.89168	4.10323	7.107	8.76111	1.59991
NWMN_RS03220	NWMN_0562		27.7582	3.57942	10.8201	18.741	13.6424	2.29701	10.9611	4.79775
NWMN_RS03225	NWMN_0563		22.9062	4.49132	15.522	13.587	3.98519	6.90256	11.8036	3.51376
NWMN_RS03230			21.5981	3.65433	10.0881	17.4731	13.7481	23.8125	15.2396	13.6939
NWMN_RS03235	NWMN_0564		21.3955	5.21945	32.6024	16.5286	0	0	7.33563	2.57357
NWMN_RS03240	NWMN_0565		21.0068	3.91942	7.05403	12.2179	0	0	15.6708	10.2042
NWMN_RS03245	NWMN_0566		22.2036	6.29407	6.71634	11.6301	3.99939	6.92715	8.66221	0.666948
NWMN_RS03250	NWMN_0567		21.5519	6.4467	0.00128421	0.00222432	0	0	13.6927	1.3191
NWMN_RS03255			14.8043	3.1697	0.00293136	0.00507726	0	0	9.4733	3.3662
NWMN_RS03260	NWMN_0570		27.4571	7.70243	0.00293136	0.00507726	13.454	2.27523	18.0369	6.81385
NWMN_RS03265			30.9548	2.05522	25.9747	6.64115	8.91395	15.4394	27.2072	14.4542
NWMN_RS03270	NWMN_0571		20.7337	5.42159	13.7294	11.8879	0	0	8.94387	4.78125
NWMN_RS03275	NWMN_0572		57.4712	3.72449	65.9738	12.3628	53.5419	11.9658	60.6105	23.035
NWMN_RS03280	NWMN_0573		75.2972	4.50615	131.176	28.3958	109.283	22.5118	163.141	58.9862
NWMN_RS03285	NWMN_0574		80.8447	15.7373	16.3027	14.1364	26.5371	7.97919	21.9332	4.38342
NWMN_RS03290	NWMN_0575		110.109	17.0348	61.8102	5.59552	61.2501	9.16475	88.9757	16.674
NWMN_RS03295	NWMN_0576		144.735	26.5402	100.115	33.8129	103.326	11.565	65.14	15.1209
NWMN_RS03300	NWMN_0577	adh1	26.4742	4.98797	40.145	17.9803	1425.5	518.315	4580.62	338.253
NWMN_RS03305			1.81237	0.216009	0.00385264	0.00667297	9.90088	17.1488	6.37661	0.413687
NWMN_RS03310	NWMN_0578		116.282	20.9309	38.5177	19.8244	56.6377	28.8579	56.2992	27.7244
NWMN_RS03315	NWMN_0579	argS	157.853	20.8372	60.5256	4.21621	68.9426	11.5452	79.4225	10.8392
NWMN_RS03320	NWMN_0580		12.1165	2.08666	7.07705	12.2578	3.97666	6.88777	14.6087	6.39615
NWMN_RS03325	NWMN_0581		111.272	34.1065	35.7956	9.62391	43.3774	27.1015	43.7221	10.5905
NWMN_RS03330	NWMN_0582		38.4065	7.13985	6.56488	11.3599	19.8187	8.43986	41.3853	18.9148
NWMN_RS03335	NWMN_0583		67.7761	11.5985	55.9138	3.57961	40.0746	12.3745	49.9446	12.5837
NWMN_RS03340	NWMN_0584		86.772	9.06784	68.285	11.6966	49.1677	15.6221	40.3593	4.58347
NWMN_RS03345	NWMN_0585		398.867	74.1777	1954.79	151.962	1748.2	427.147	1320.69	332.204
NWMN_RS03350	NWMN_0586		57.6292	13.5694	59.833	11.1364	28.7816	10.2291	23.2897	8.73385
NWMN_RS03355	NWMN_0587		35.6499	8.0498	81.1151	11.9127	50.0888	6.87601	115.719	92.6826
NWMN_RS03360	NWMN_0588	sarA	808.743	49.9349	393.114	65.2349	1034.05	474.13	357.1	56.8036
NWMN_RS03365	NWMN_0590		23.4985	3.90209	23.0541	7.54937	20.4576	3.26131	18.4012	3.24136
NWMN_RS03370			7.20982	0.745776	0.0092631	0.0160442	0	0	6.91982	1.32933
NWMN_RS03375			8.90414	1.1367	11.0314	19.0723	15.3577	26.6003	20.2878	13.7391
NWMN_RS03380	NWMN_0592		41.8479	5.31443	13.4761	11.8304	16.3428	3.57547	40.4469	33.693
NWMN_RS03385	NWMN_0593	mnhA, mnhA2	43.3355	6.15251	22.1896	2.59892	28.074	6.41339	24.6066	8.33526
NWMN_RS03390	NWMN_0594	mnhB, mnhB2	39.8077	6.29263	15.5222	26.8495	20.9769	25.6534	41.7128	10.1414
NWMN_RS03395	NWMN_0595	mnhC, mnhC2	33.9466	4.09884	38.1267	24.3176	14.7081	25.4752	30.0288	21.8005
NWMN_RS03400	NWMN_0596	mnhD, mnhD2	42.8284	5.59129	22.8292	5.5952	30.0374	14.8788	14.21	3.03505
NWMN_RS03405	NWMN_0597	mnhE, mnhE2	32.5653	7.87452	23.3645	1.68993	33.0759	16.6721	15.0113	8.23158
NWMN_RS03410	NWMN_0598	mnhF, mnhF2	51.326	8.38362	15.7584	27.2573	35.9675	21.8927	35.1381	13.7027
NWMN_RS03415	NWMN_0599	mnhG, mnhG2	47.0849	5.14709	20.5898	19.9287	36.8133	34.725	44.3877	10.8093
NWMN_RS03420	NWMN_0600		94.9287	21.1585	194.167	16.4389	138.19	22.2211	36.4651	18.2931
NWMN_RS03425	NWMN_0601	sitC, mntC	22.4508	3.91803	255.207	13.3393	627.678	72.9737	2584.58	349.563
NWMN_RS03430	NWMN_0602	sitB, mntB	20.486	2.97709	144.833	7.62562	492.37	122.979	2599.53	236.585
NWMN_RS03435	NWMN_0603	sitA, mntA	24.9417	3.29815	131.486	13.6567	687.509	272.779	3274.56	612.335
NWMN_RS03440	NWMN_0604	feoA, mntR	84.1169	12.7614	191.338	31.9871	206.734	71.928	145.108	59.5231
NWMN_RS03445			24.401	2.68293	95.7603	3.50327	55.1887	19.8143	14.8751	7.49207
NWMN_RS03450	NWMN_0606	tagA	150.567	30.3767	51.1837	15.4431	89.3976	18.7355	115.285	21.6278
NWMN_RS03455	NWMN_0607	tagH	214.098	18.6183	276.814	43.2171	226.539	14.8751	97.7332	14.7285
NWMN_RS03460	NWMN_0608	tagG	184.132	17.0318	204.049	17.0723	134.943	28.9173	143.031	68.8777
NWMN_RS03465	NWMN_0609	tagB	47.5236	5.57132	44.9363	8.35372	45.4718	5.92175	31.3312	1.83204
NWMN_RS03470	NWMN_0610	tagX	50.0848	3.78984	63.338	10.7303	60.3807	33.5656	25.657	7.10951
NWMN_RS03475	NWMN_0611	tagD	60.8149	5.02926	84.3729	11.1887	51.1757	29.7946	36.1189	27.4332
NWMN_RS03480	NWMN_0612	pbp4	69.7035	8.1626	43.581	16.3538	26.3232	5.71587	27.6548	13.3645
NWMN_RS03485	NWMN_0613	AbcA	158.769	52.3027	602.67	106.129	289.613	75.0378	116.18	41.0202
NWMN_RS03490	NWMN_0614		276.657	44.4777	102.723	7.06641	155.067	24.3608	272.027	21.6733
NWMN_RS03495			0.073091	0.246872	0.0181619	0.0314574	0	0	0	0
NWMN_RS03500	NWMN_0615		69.3713	10.6007	66.7858	5.1544	73.34	9.16766	50.8422	15.2475
NWMN_RS03505	NWMN_0616	fhuA	54.5156	15.7975	47.0611	5.52629	125.325	11.7137	162.487	29.6972
NWMN_RS03510	NWMN_0617	fhuB	33.8539	7.55602	28.5473	10.8984	44.8822	5.18844	30.7997	8.06219
NWMN_RS03515	NWMN_0618	fhuG	43.5841	8.58639	48.3152	6.59975	64.7339	10.1093	53.2847	16.4162
NWMN_RS03520	NWMN_0619	dhaK	12.886	0.901157	151.306	28.9021	66.4459	9.90928	101.813	23.3866
NWMN_RS03525	NWMN_0620		14.9436	0.979144	153.904	36.9513	58.3202	5.49108	109.418	15.3468
NWMN_RS03530	NWMN_0621		16.5556	0.612142	199.211	28.3638	61.5808	23.4168	59.9134	55.0736
NWMN_RS03535	NWMN_0622		491.567	25.3384	677.937	47.7274	487.599	85.3614	326.355	35.2155
NWMN_RS03540	NWMN_0623		282.745	21.724	427.545	70.5797	228.639	90.8271	79.8475	10.4715
NWMN_RS03545	NWMN_0624	lipA	50.3975	3.87542	15.5632	13.4896	36.1787	7.9456	10.7202	2.82187
NWMN_RS03550			40.7106	6.55333	0.019856	0.0314935	0	0	16.4864	14.8728
NWMN_RS03555	NWMN_0625		55.0858	3.00394	79.5639	5.51616	50.0438	18.8306	15.7828	7.22494
NWMN_RS03560	NWMN_0626		71.6107	2.29351	113.246	26.8337	52.7237	6.15115	71.4587	6.63895
NWMN_RS03565	NWMN_0627	graX	46.0796	5.07035	84.1957	8.00459	51.6366	13.7464	41.7699	4.49965
NWMN_RS03570	NWMN_0628	apsR, graR	46.1317	6.22922	97.7396	29.2853	44.4816	15.521	22.8294	11.4708
NWMN_RS03575	NWMN_0629	apsS, graS	50.0083	6.98168	94.6708	33.0562	71.4604	18.933	27.9278	9.85833
NWMN_RS03580	NWMN_0630	vraF	65.6828	11.1158	38.7182	9.82186	30.0939	12.3637	29.605	8.83818
NWMN_RS03585	NWMN_0631	vraG	64.0884	11.4406	48.9952	9.29401	36.8509	19.4058	29.7726	7.74754
NWMN_RS03590	NWMN_0632		243.146	8.40252	143.637	42.7372	129.637	27.9942	135.108	28.7771
NWMN_RS03595	NWMN_0633		259.721	18.2189	157.387	15.9736	131.642	8.7481	129.355	5.9098
NWMN_RS03600	NWMN_0634		284.419	29.2288	347.452	52.5301	509.293	158.373	577.846	397.542
NWMN_RS03605	NWMN_0635		62.8289	15.2299	42.8495	11.9969	44.8426	2.35742	24.9966	7.32352
NWMN_RS03610	NWMN_0636		33.2589	6.16905	5.43582	9.36257	18.1853	3.64729	9.53937	3.24721
NWMN_RS03615	NWMN_0637	sarX	61.3029	20.8741	10.7778	18.6072	67.7192	89.7845	19.0572	5.84666
NWMN_RS03620	NWMN_0638		184.062	4.68931	241.476	35.7181	168.573	38.3717	310.178	54.6397
NWMN_RS03625	NWMN_0639		152.269	2.69137	201.242	91.7418	212.049	38.329	161.496	64.6532
NWMN_RS03630			4.95246	3.24217	0.0251301	0.0361789	0	0	0.400476	0.693645
NWMN_RS03635	NWMN_0640		93.101	15.6481	75.1889	11.3207	42.9313	24.2777	28.9446	12.5014
NWMN_RS03640	NWMN_0641	ccpE	110.802	12.9582	117.811	17.3994	88.9012	21.7052	42.7788	34.3764
NWMN_RS03645			43.9214	5.58031	98.3383	49.7371	36.271	16.4386	9.7999	4.73631
NWMN_RS03650	NWMN_0642		79.8183	5.09667	73.2641	42.8845	45.7605	6.06343	22.1709	9.90814
NWMN_RS03655	NWMN_0643		71.3915	8.66649	77.8924	49.8978	27.911	11.5257	28.754	12.417
NWMN_RS03660	NWMN_0644		34.0113	8.07782	33.6623	12.6222	23.3053	4.38847	9.20867	2.25319
NWMN_RS03665	NWMN_0645		11.3597	0.762368	10.0115	17.2802	0	0	6.15415	2.68372
NWMN_RS03670	NWMN_0646		107.079	14.5129	60.2462	28.5834	17.6043	17.0477	225.57	129.534
NWMN_RS03675	NWMN_0647		139.436	15.7976	47.614	17.3517	52.2446	28.4461	173.527	109.871
NWMN_RS03680	NWMN_0648		48.4805	4.16167	0.0285842	0.0404123	7.04414	12.2008	29.7137	18.9359
NWMN_RS03685	NWMN_0649		125.365	18.42	89.6687	10.6892	100.288	24.8509	59.3888	15.7744
NWMN_RS03690	NWMN_0650		116.957	27.6216	31.6136	11.5583	57.5863	20.9374	51.8771	43.2963
NWMN_RS03695	NWMN_0651		195.332	19.1101	100.053	26.8879	92.3828	31.5473	402.874	240.977
NWMN_RS03700	NWMN_0652	uppP	105.603	5.41315	67.1611	14.4194	58.439	16.5959	70.3476	10.7179
NWMN_RS03705	NWMN_0653		46.1489	8.89825	64.8021	17.2771	66.7207	4.99558	26.6371	18.2213
NWMN_RS03710	NWMN_0654		59.4469	11.5375	58.1614	7.55933	59.0997	2.33481	49.7261	7.29965
NWMN_RS03715	NWMN_0655	mgrA	1893.55	503.071	970.02	160.989	1948.29	596.509	1299.01	157.152
NWMN_RS03720	NWMN_0656		30.312	4.30347	37.8107	7.68802	37.5375	5.28822	53.1384	27.8513
NWMN_RS03725	NWMN_0657		77.172	9.84262	32.0547	9.43315	56.3037	13.2029	214.405	53.7351
NWMN_RS03730	NWMN_0658		50.0122	14.2328	29.0807	10.4987	51.6016	41.2504	57.1264	47.6727
NWMN_RS03735	NWMN_0659		26.8538	2.89037	42.7222	2.94253	34.0105	4.15951	99.9236	22.4031
NWMN_RS03740	NWMN_0660		37.0938	3.23162	67.5931	12.7873	65.8282	18.3818	117.914	58.0436
NWMN_RS03745	NWMN_0661		72.9112	8.11113	59.8475	15.9012	36.759	19.8649	12.6999	7.66142
NWMN_RS03750	NWMN_0662		64.9457	10.5939	34.7387	7.61903	29.0675	14.5033	11.3611	3.10019
NWMN_RS03755	NWMN_0663		46.8313	6.46267	32.8458	16.1493	29.8203	12.7733	11.673	1.00997
NWMN_RS03760	NWMN_0664	norA	61.9709	11.3228	31.2735	1.49018	36.983	4.20474	29.4076	4.43196
NWMN_RS03765	NWMN_0665		128.264	19.4053	70.7455	13.5823	79.156	37.1999	174.118	21.142
NWMN_RS03770	NWMN_0666	ybaK	25.6775	3.85379	29.8157	8.99203	27.1663	13.795	81.6004	61.1403
NWMN_RS03775	NWMN_0667		145.01	25.8125	30.1589	11.5061	35.7953	27.8622	30.8108	13.2817
NWMN_RS03780	NWMN_0668	fruB	142.51	21.3586	51.8922	5.80265	67.688	30.0376	123.542	19.9178
NWMN_RS03785	NWMN_0669	fruA	194.331	26.6086	97.9138	19.7049	106.25	21.5541	86.0939	19.4819
NWMN_RS03795	NWMN_0670	nagA	45.7118	5.36657	50.8994	16.6867	36.6678	16.295	90.2493	7.4661
NWMN_RS03800	NWMN_0671		141.659	17.0605	146.204	29.3062	163.292	44.043	118.606	19.1872
NWMN_RS03805	NWMN_0672		42.4577	5.16405	40.4754	21.3579	42.9113	23.8303	39.5588	19.7027
NWMN_RS03810	NWMN_0673		58.8829	10.5346	80.7678	20.0243	74.1908	14.9497	89.5453	63.4813
NWMN_RS03815	NWMN_0674	saeS	1732.76	70.8142	1660.67	63.6296	1664.62	1033.8	1402.39	425.145
NWMN_RS03820	NWMN_0675	saeR	1904.77	148.848	2133.98	90.1302	1867.88	744.847	1745.16	464.633
NWMN_RS03825	NWMN_0676		1757.68	82.6779	1040.05	111.184	1070.62	346.666	1708.72	565.463
NWMN_RS03830	NWMN_0677		3451.51	475.684	3374.94	747.942	2520.83	652.834	3554.21	196.882
NWMN_RS03835	NWMN_0678		113.726	31.3819	161.732	32.1952	127.437	40.1425	34.9478	4.72037
NWMN_RS03840	NWMN_0679	queE	74.9054	4.76312	110.025	2.01601	107.976	28.524	163.071	46.8042
NWMN_RS03845	NWMN_0680		56.7431	4.23403	57.6813	24.7497	62.0852	11.7861	141.204	63.7011
NWMN_RS03850	NWMN_0681	queC	51.1736	1.615	52.0346	19.5865	48.517	4.9973	69.2269	32.4669
NWMN_RS03855	NWMN_0682	pabA	440.098	26.4772	141.207	15.7157	143.005	49.5325	199.124	39.3814
NWMN_RS03860	NWMN_0683	pabB	470.063	9.47708	158.114	9.46827	154.139	16.2583	214.732	36.6083
NWMN_RS03865	NWMN_0684	pabC	446.488	12.3564	161.597	23.7341	127.789	28.5893	163.794	67.0243
NWMN_RS03870			406.69	60.8546	59.568	30.4694	54.8623	55.0093	107.142	76.0246
NWMN_RS03875	NWMN_0685		473.208	24.4373	125.032	13.1859	120.555	10.1233	234.161	92.2612
NWMN_RS03880	NWMN_0686		493.895	35.4705	227.923	41.8017	181.122	33.5591	257.226	19.2287
NWMN_RS03885	NWMN_0687	ltaS	654.698	50.3411	1467.21	56.3501	1165.07	371.191	552.048	44.8231
NWMN_RS03895	NWMN_0688		51.0249	6.39019	88.0727	17.2258	75.2282	16.9682	58.9944	10.6829
NWMN_RS03900	NWMN_0689	recQ	73.8739	9.05236	149.512	28.0329	170.713	4.56593	76.8068	13.4954
NWMN_RS03905	NWMN_0690		124.168	0.457788	59.4943	10.3534	63.032	20.059	87.0105	22.5431
NWMN_RS03910	NWMN_0691		136.385	6.66466	90.8315	13.9049	73.0187	12.9232	52.7471	17.2926
NWMN_RS03915	NWMN_0692	hisC	26.1737	2.40334	30.4676	14.5259	21.3997	4.42378	30.5712	10.6578
NWMN_RS03920	NWMN_0693		110.704	19.0147	52.1053	18.5579	52.0569	25.6901	25.3753	5.28843
NWMN_RS03930	NWMN_0695		38.9527	2.97482	62.0337	6.66703	43.1907	14.2379	47.3897	29.0548
NWMN_RS03935			5.86921	2.33348	0.0296398	0.0417303	0	0	7.09454	4.3202
NWMN_RS03940	NWMN_0696		128.021	32.7438	59.0515	7.31	92.6757	79.2646	214.181	45.7562
NWMN_RS03945	NWMN_0697	folE, queF	61.2833	8.77133	72.1934	20.6548	66.3388	31.1142	38.4247	16.6733
NWMN_RS03950	NWMN_0698		55.0576	6.90969	61.0502	19.5296	40.0284	23.6615	15.0447	3.02525
NWMN_RS03955	NWMN_0699	nrdI	146.256	77.06	235.464	61.0426	175.764	56.3782	160.614	38.3365
NWMN_RS03960	NWMN_0700	nrdE	229.796	124.823	348.439	31.5683	466.558	95.2455	226.52	61.6603
NWMN_RS03965	NWMN_0701	nrdF	351.011	144.77	224.953	11.2753	341.172	37.5262	179.527	69.0612
NWMN_RS03970			8.88481	1.45289	0.0322892	0.0455741	0	0	42.5298	34.8679
NWMN_RS03975			0.381797	0.370679	0.038156	0.0442595	0	0	3.81191	4.51604
NWMN_RS03980	NWMN_0702	sstA	17.4196	3.75417	20.6683	3.31278	47.7538	50.611	137.44	78.0959
NWMN_RS03985	NWMN_0703	sstB	18.7435	2.0981	5.76886	9.86609	29.9534	21.2542	34.209	25.758
NWMN_RS03990	NWMN_0704	sstC	18.4727	5.10797	10.7545	9.71233	30.2639	30.6318	25.5644	22.5763
NWMN_RS03995	NWMN_0705	sstD	48.285	13.4836	22.2807	5.24564	149.378	142.468	128.12	101.1
NWMN_RS04000	NWMN_0706		96.7607	7.92924	55.968	10.6611	52.1184	14.3964	69.5961	25.3208
NWMN_RS04005	NWMN_0707	murB	102.206	8.11526	52.1603	12.4422	79.1154	8.86439	74.4577	21.2955
NWMN_RS04010	NWMN_0708		53.8903	11.6914	4.74735	7.97876	9.83444	8.81447	11.6234	4.93027
NWMN_RS04015	NWMN_0709		94.6066	30.8547	83.8466	24.0859	63.3171	29.1705	29.3602	20.1812
NWMN_RS04020	NWMN_0710		223.947	40.1189	99.3527	20.3303	216.931	58.8177	46.5388	29.9869
NWMN_RS04025	NWMN_0711		81.0919	5.21183	106.576	18.9916	73.7846	19.5084	33.9209	9.05602
NWMN_RS04030	NWMN_0712	pepT	115.61	8.66537	133.012	22.8567	129.69	19.2962	75.4558	30.6131
NWMN_RS04035	NWMN_0713		49.402	1.15938	55.2774	19.6632	26.1485	11.9834	22.1877	2.72066
NWMN_RS04040	NWMN_0714		40.9029	1.57756	22.8714	3.48788	28.3082	11.6476	20.37	3.06832
NWMN_RS04045	NWMN_0715	gdpS	104.339	5.05619	125.076	5.71709	127.868	39.3756	51.2603	29.5218
NWMN_RS04050	NWMN_0716	llm	57.6562	7.79304	31.297	5.03559	52.8666	19.2925	47.4221	16.5331
NWMN_RS04055	NWMN_0717		72.9573	15.792	133.814	23.6657	131.006	17.2283	30.8239	14.8411
NWMN_RS04060	NWMN_0718		235.032	22.9314	138.394	35.817	97.5608	22.3799	157.959	30.7221
NWMN_RS04065	NWMN_0719		9.87354	0.924535	10.0403	8.83723	13.4377	1.49388	49.7595	24.2066
NWMN_RS04070	NWMN_0720		7.0919	0.206616	22.3922	6.54675	10.6077	10.0626	20.8245	12.0439
NWMN_RS04075	NWMN_0721	yfiA, hpf	128.439	45.178	3078.34	134.605	3202.43	980.457	1167.95	508.031
NWMN_RS04080	NWMN_0722	secA, secA1	221.963	20.5006	503.834	29.909	400.181	34.044	149.202	23.846
NWMN_RS04085			14.2365	4.63552	17.4048	29.8327	0	0	20.754	17.7789
NWMN_RS04090	NWMN_0723	prfB	84.0754	9.17037	70.953	5.95201	83.5733	7.65115	88.4709	41.6265
NWMN_RS04095			5.79581	1.91343	0.139112	0.203349	10.5624	18.2947	24.3219	18.5856
NWMN_RS04100	NWMN_0724		12.5493	1.5785	15.3608	13.4179	23.9937	8.69436	8.99149	0.588934
NWMN_RS04105	NWMN_0725		69.5435	20.4929	60.0139	33.6057	80.4364	8.30193	27.7668	14.7577
NWMN_RS04110			58.3083	15.0855	33.4755	41.6092	48.3959	69.7674	34.6816	21.1771
NWMN_RS04115	NWMN_0726	uvrB	52.4816	19.5123	185.646	44.6157	137.81	32.6078	96.0751	17.5566
NWMN_RS04120	NWMN_0727	uvrA	74.664	34.0333	224.558	26.6937	210.253	5.70406	107.832	28.4826
NWMN_RS04125	NWMN_0728	hprK	92.0002	12.072	68.6938	24.6557	108.888	15.4139	171.365	49.8941
NWMN_RS04130	NWMN_0729	lgt	67.3034	7.67526	44.3945	16.6984	64.1109	18.2587	91.2133	13.7704
NWMN_RS04135	NWMN_0730		77.7644	10.255	40.77	4.16518	100.681	17.8619	63.9557	6.64865
NWMN_RS04140	NWMN_0731		77.421	6.15673	38.9056	6.44409	51.7005	10.6502	28.1699	4.61837
NWMN_RS04145	NWMN_0732	trxB	385.093	79.0729	250.622	33.2616	225.464	68.3219	254.191	77.6021
NWMN_RS04150			88.2234	20.0715	0.187627	0.27776	28.2154	28.4004	65.213	35.0468
NWMN_RS04155	NWMN_0733		51.2983	5.46032	101.677	35.6565	84.3478	15.4259	53.5723	0.266761
NWMN_RS04160	NWMN_0734		90.1199	12.768	250.335	30.2495	155.855	38.5141	284.469	129.598
NWMN_RS04165	NWMN_0735	whiA	99.0711	9.83692	251.717	38.3393	209.571	37.4317	157.394	94.3541
NWMN_RS04175	NWMN_0736	clpP	541.897	23.9314	1134.98	216.497	1067.15	76.1347	360.604	66.7059
NWMN_RS04180	NWMN_0737		46.6956	0.853908	85.9874	20.596	58.7491	13.5314	56.2684	21.194
NWMN_RS04185	NWMN_0738		128.218	20.6212	124.479	27.5658	81.8238	15.7938	479.827	124.327
NWMN_RS04190	NWMN_0740	gapR	841.333	52.8555	444.198	34.3442	1555.19	246.297	839.12	353.074
NWMN_RS04195	NWMN_0741	gap	1764.06	184.617	675.626	31.6012	2266.97	626.219	1428.87	1178.33
NWMN_RS04200	NWMN_0742	pgk	455.567	81.8794	196.696	11.5431	533.962	178.698	432.904	404.379
NWMN_RS04205	NWMN_0743	tpiA	576.005	81.3374	196.688	41.0505	546.004	79.034	541.663	536.048
NWMN_RS04210	NWMN_0744	pgm	529.029	80.5441	237.877	30.4149	563.154	114.043	504.865	488.488
NWMN_RS04215	NWMN_0745	eno	1080.72	79.7326	1162.84	52.3069	1629.29	338.232	1313.89	224.094
NWMN_RS04220	NWMN_0746		93.243	14.316	127.586	59.2291	94.6798	37.1782	49.6831	33.1447
NWMN_RS04225	NWMN_0747	secG	182.466	12.7378	297.592	72.0408	229.402	38.4617	121.712	75.4881
NWMN_RS04230	NWMN_0748	est	88.9113	7.53491	105.283	30.3269	79.3395	17.7754	59.9242	9.03851
NWMN_RS04235	NWMN_0749	rnr	157.12	14.0356	129.032	9.44413	120.46	24.107	108.149	40.5986
NWMN_RS04240	NWMN_0750	smpB	157.981	14.2182	228.252	26.8885	178.873	16.7901	73.4052	18.6231
NWMN_RS04245			15.2474	3.41829	6.27567	10.3631	0	0	22.5794	4.89542
NWMN_RS04250	NWMN_0752		23.0549	4.45179	17.1347	29.1619	28.8746	37.8533	26.6751	15.3239
NWMN_RS04255			20.3103	1.17042	12.9238	21.9035	0	0	14.3382	4.62795
NWMN_RS04260	NWMN_0753		18.9728	1.53313	20.6483	19.0456	11.5206	10.409	28.8404	8.717
NWMN_RS04265			1.49969	0.405581	0.213149	0.313285	7.82087	13.5461	3.27057	1.78435
NWMN_RS04270	NWMN_0754		9.77397	1.29205	10.7118	18.4931	5.44792	9.43608	15.9622	5.34163
NWMN_RS04275	NWMN_0755		28.2521	2.23105	27.1335	23.4362	14.0446	2.47316	17.9094	4.93843
NWMN_RS04280	NWMN_0756	clfA	75.7437	10.2651	776.025	103.752	366.816	47.565	456.314	265.671
NWMN_RS04285	NWMN_0757		180.571	170.633	45.0978	5.03058	18.21	1.14689	15.3732	4.0443
NWMN_RS04290	NWMN_0758	ssp	46.67	7.8852	207.465	57.3871	735.747	640.282	637.173	143.918
NWMN_RS04295	NWMN_0759		355.776	107.793	59.2031	34.855	67.4085	16.4325	81.1792	74.6388
NWMN_RS04300	NWMN_0760	nuc	209.944	50.1979	30.3051	21.2103	127.76	86.0872	754.315	525.92
NWMN_RS04305	NWMN_0761	cspC	743.252	122.727	1763.73	552.061	4597	2997.23	2320.01	1544.57
NWMN_RS04310	NWMN_0762		31.8722	1.59245	10.2807	17.3088	0	0	13.6994	8.9832
NWMN_RS04315	NWMN_0763		34.4225	2.17711	0.2279	0.330011	12.535	11.2704	8.90523	3.58896
NWMN_RS04320	NWMN_0764		32.2215	3.67287	0.250541	0.3633	15.3602	13.3557	20.0118	3.46099
NWMN_RS04325	NWMN_0765	TsaT	55.7847	18.6618	79.7603	27.469	16.0753	27.8433	20.8004	19.2036
NWMN_RS04330			48.3935	10.6838	49.8218	48.6108	33.6161	15.6546	7.60543	3.99135
NWMN_RS04335	NWMN_0766		30.5305	5.73334	0.259365	0.36172	9.40159	16.284	180.155	156.338
NWMN_RS04340	NWMN_0767		166.536	28.2948	125.928	9.11111	70.3284	62.1516	461.418	328.885
NWMN_RS04345	NWMN_0768		58.0141	12.0531	51.5588	10.7539	51.4435	18.846	32.9933	16.9449
NWMN_RS04350	NWMN_0769		154.412	34.9598	94.6098	6.87167	63.2072	13.2592	57.2696	38.1056
NWMN_RS04355	NWMN_0770		217.797	55.0601	67.0236	38.4194	182.185	88.547	109.041	33.1882
NWMN_RS04360	NWMN_0771		35.6634	2.43733	70.1854	22.7748	52.5853	19.5659	67.6165	53.6105
NWMN_RS04365	NWMN_0772	aroD	33.1503	3.20516	32.0213	8.002	27.2433	8.21319	16.9354	4.13875
NWMN_RS04370	NWMN_0773		63.574	6.68799	107.644	14.2703	168.109	78.3135	198.972	33.567
NWMN_RS04375	NWMN_0774		164.223	16.761	236.458	59.223	158.222	45.0371	67.9391	64.0525
NWMN_RS04380	NWMN_0775		209.586	40.6016	84.4554	27.4684	77.5171	34.1953	106.91	8.90247
NWMN_RS04385	NWMN_0776	gcvH	599.334	61.4703	554.828	87.8299	306.812	104.281	350.22	58.6126
NWMN_RS04390			23.575	7.82218	0.277709	0.391853	9.98829	17.3002	5.78493	5.02637
NWMN_RS04395	NWMN_0777	truncated-SA	36.7793	3.89282	27.1943	9.89641	16.5553	18.361	42.6875	4.87066
NWMN_RS04405	NWMN_0778		50.8232	5.12278	62.0969	21.0434	41.4821	16.1023	53.069	16.5083
NWMN_RS04410	NWMN_0779		53.9865	10.2732	48.3907	42.9575	72.3595	33.4392	72.5765	52.6094
NWMN_RS04415	NWMN_0780	metN	37.4459	16.6943	68.7553	9.39769	77.8662	52.8966	136.144	192.487
NWMN_RS04420	NWMN_0781		28.5604	12.8567	67.5359	39.1367	66.4015	40.8931	151.617	152.411
NWMN_RS04425	NWMN_0782		37.14	20.7861	116.998	22.4161	122.843	54.4847	179.055	207.967
NWMN_RS04430	NWMN_0783		1504.02	392.935	2712.64	343.922	3579.94	2498.04	2919.56	1992.39
NWMN_RS04435	NWMN_0784		89.6725	17.8971	42.9303	10.6261	35.8272	9.79605	16.2673	7.16393
NWMN_RS04440	NWMN_0785	sufC	317.352	74.5876	417.006	105.233	201.151	12.3132	161.314	80.7262
NWMN_RS04445	NWMN_0786	sufD	303.884	70.9586	586.428	59.7385	370.02	111.718	152.283	81.228
NWMN_RS04450	NWMN_0787	sufS	290.547	77.7086	523.842	39.1862	336.594	66.0433	139.446	37.8807
NWMN_RS04455	NWMN_0788	nifU	270.777	49.0092	544.328	53.1793	418.548	168.795	114.793	40.7117
NWMN_RS04460	NWMN_0789	sufB	348.648	91.9873	1010.57	130.647	741.949	247.759	198.555	94.7685
NWMN_RS04465			12.3582	4.19581	0.327173	0.377678	0	0	9.16122	2.18387
NWMN_RS04470	NWMN_0790		21.5829	6.41228	8.61977	14.2883	16.0806	16.5893	8.63059	3.62862
NWMN_RS04475	NWMN_0791		42.3257	3.82086	43.1695	9.63206	24.472	2.04059	74.0049	21.0787
NWMN_RS04480	NWMN_0792		50.8235	6.80657	36.8071	15.8608	23.6421	5.65266	183.523	52.1224
NWMN_RS04485			21.2742	2.38921	0.347275	0.388393	0	0	11.9474	5.04967
NWMN_RS04490	NWMN_0793		43.7731	3.46435	61.9941	17.6194	25.8528	4.18962	34.6716	16.2935
NWMN_RS04495	NWMN_0794		39.2099	3.37767	49.5702	12.1224	36.3418	6.37101	34.9101	9.35721
NWMN_RS04500	NWMN_0795		48.2554	3.44086	75.7287	26.2837	49.3454	12.613	30.819	10.9345
NWMN_RS04505	NWMN_0796	lipA	370.594	7.31162	369.334	54.4623	330.104	17.4614	284.838	21.5296
NWMN_RS04510	NWMN_0797		97.7641	20.5155	35.4612	25.9057	19.1976	19.1618	22.406	7.4516
NWMN_RS04515	NWMN_0798		83.8815	19.6224	16.3697	28.0771	22.9603	22.9868	20.1568	22.1626
NWMN_RS04520	NWMN_0799		113.576	17.2061	60.4856	30.7556	39.8905	7.27	125.541	26.6208
NWMN_RS04525	NWMN_0800		111.989	12.7995	73.487	9.39144	94.8121	28.7624	110.116	66.9768
NWMN_RS04530	NWMN_0801		107.152	5.34681	100.898	21.4443	153.603	10.8307	125.334	37.3588
NWMN_RS04535			62.2465	23.1709	0.39541	0.407355	0	0	10.9238	3.87868
NWMN_RS04540	NWMN_0802		184.697	27.1306	61.2132	51.6713	7.90306	13.6885	37.7716	42.2125
NWMN_RS04545	NWMN_0803	dltA	419.683	34.1845	165.996	13.2382	161.885	43.3446	139.278	55.0924
NWMN_RS04550	NWMN_0804	dltB	416.921	51.1898	155.016	46.8136	145.601	5.83038	110.171	68.7161
NWMN_RS04555	NWMN_0805	dltC	501.53	41.2989	165.048	24.7714	114.064	36.251	84.0956	37.5865
NWMN_RS04560	NWMN_0806	dltD	608.832	47.6045	253.527	68.7626	259.714	32.3722	101.547	71.354
NWMN_RS04565	NWMN_0807		406.476	54.6555	388.022	111.687	340.762	85.2019	180.194	30.6755
NWMN_RS04570	NWMN_0808		37.8598	4.55948	25.3128	22.2836	28.8019	25.2666	14.4084	2.55011
NWMN_RS04575	NWMN_0809		93.0322	6.5624	210.835	35.4416	168.797	58.6229	183.878	18.1273
NWMN_RS04580	NWMN_0810		109.064	5.09887	187.905	32.5071	100.393	40.2719	122.796	25.522
NWMN_RS04585			68.3714	2.92335	138.853	25.1177	191.617	37.4163	37.0284	26.3198
NWMN_RS04590	NWMN_0811		867.627	48.2974	265.478	15.2134	279.991	44.5323	318.759	162.068
NWMN_RS04595	NWMN_0812	ampA	68.4052	9.87929	58.507	14.0389	54.0506	10.1491	41.3058	11.4987
NWMN_RS04600	NWMN_0813		85.5458	14.0758	39.5657	17.6509	67.112	56.8318	55.4813	13.8879
NWMN_RS04605	NWMN_0814		104.902	13.9507	75.6721	25.1723	82.4714	39.8875	82.086	54.489
NWMN_RS04610	NWMN_0815		8.58579	0.273176	36.0286	9.41325	23.1539	6.00799	89.1622	71.3856
NWMN_RS04615	NWMN_0816	mnhG, mnhG1	180.114	29.1463	48.0092	22.9934	59.9363	66.9118	45.74	10.4949
NWMN_RS04620	NWMN_0817	mnhF, mnhF1	165.778	28.2985	92.2333	18.6246	106.239	48.174	42.6301	15.5345
NWMN_RS04625	NWMN_0818	mnhE, mnhE1	200.96	40.3952	66.4427	16.4763	65.111	24.7747	70.3365	24.0768
NWMN_RS04630	NWMN_0819	mnhD, mnhD1	202.694	40.6093	107.477	7.23002	118.255	37.283	96.2684	7.25311
NWMN_RS04635	NWMN_0820	mnhC, mnhC1	177.474	21.5564	72.5525	4.48	72.3808	15.7387	94.9892	19.123
NWMN_RS04640	NWMN_0821	mnhB, mnhB1	146.993	20.4449	64.5948	30.7255	99.8296	76.5562	79.1714	35.6433
NWMN_RS04645	NWMN_0822	mnhA, mnhA1	177.956	29.8018	68.4808	4.30129	90.9264	35.4493	138.951	22.8641
NWMN_RS04650	NWMN_0823		36.3023	5.56075	30.472	17.4807	26.0902	12.1657	14.6028	4.46634
NWMN_RS04655	NWMN_0824	ppi	307.316	27.0898	415.123	57.7252	358.382	52.3051	206.154	20.8241
NWMN_RS04660	NWMN_0825		204.527	37.8623	384.858	105.354	375.027	46.7949	352.286	33.9204
NWMN_RS04665	NWMN_0826		55.6064	10.3898	98.335	14.2371	42.7811	11.3948	25.8388	13.3825
NWMN_RS04670	NWMN_0827	rocD	41.4657	6.8593	516.682	42.6858	205.088	38.6072	139.529	26.7958
NWMN_RS04675	NWMN_0828	gudB	70.3506	7.99256	1065.74	65.3603	524.846	84.0256	295.904	9.74769
NWMN_RS04685	NWMN_0830	glpQ	12.6252	1.91147	35.9465	3.07802	38.0664	4.53623	415.784	190.086
NWMN_RS04690	NWMN_0831	argH	21.4472	1.82095	75.3729	1.11611	160.082	103.725	157.472	84.0876
NWMN_RS04695	NWMN_0832	argG	18.8051	2.40038	37.7398	5.77697	155.937	114.21	154.685	113.152
NWMN_RS04700	NWMN_0833	pgi	520.301	83.1921	403.788	79.0235	426.52	44.0398	505.628	42.7995
NWMN_RS04705	NWMN_0834		112.217	19.1991	47.5872	8.06229	53.1284	5.22654	23.433	12.4634
NWMN_RS04710	NWMN_0835	spsA	153.727	11.4655	97.2676	20.9877	126.432	47.3334	45.5602	12.8798
NWMN_RS04715	NWMN_0836	spsB	187.575	11.8977	157.875	27.6734	131.629	28.9349	37.3793	19.3103
NWMN_RS04720	NWMN_0837	rexB, addB	43.5727	5.65021	74.4132	5.12301	48.0435	6.87816	25.129	6.7893
NWMN_RS04725	NWMN_0838	rexA, addA	60.3887	7.54821	133.698	14.1056	84.6873	24.5019	23.0211	5.43861
NWMN_RS04730	NWMN_0839		430.239	27.6596	563.23	74.182	469.328	40.3747	470.239	61.9055
NWMN_RS04735	NWMN_0840		161.701	19.7446	78.5963	28.5938	51.256	13.343	71.3151	19.717
NWMN_RS04740	NWMN_0841	cdr	156.968	31.9455	233.413	33.7876	233.555	63.0113	157.13	58.2915
NWMN_RS04745	NWMN_0842		77.494	8.62416	109.324	20.7437	39.6332	13.607	52.4207	15.489
NWMN_RS04750	NWMN_0843		561.335	85.386	592.141	59.7571	809.033	165.388	275.174	39.1665
NWMN_RS04755	NWMN_0844	clpB	14.6691	1.83041	19.1067	1.20441	18.5882	6.6482	10.098	2.21803
NWMN_RS04760	NWMN_0845	clpB	31.0228	7.88211	942.868	238.461	4290.72	967.65	400.61	266.327
NWMN_RS04765	NWMN_0846		12.1557	4.55743	0.456346	0.433363	12.6982	1.93881	5.60418	1.44692
NWMN_RS04770	NWMN_0847		2.31409	0.391931	11.026	9.44602	16.1428	3.56121	7.53407	2.23395
NWMN_RS04775	NWMN_0848		6.09757	1.33162	7.43288	11.645	18.1068	8.26226	6.13706	1.83532
NWMN_RS04780	NWMN_0849		9.25172	2.56158	12.8996	11.1315	18.3806	10.1321	7.72461	2.75352
NWMN_RS04785	NWMN_0850		26.7363	4.10885	18.308	17.0543	19.3463	21.2144	22.205	5.95134
NWMN_RS04790	NWMN_0851		66.8386	8.7318	344.311	41.8203	268.679	84.8564	126.426	29.8274
NWMN_RS04795			493.779	148.134	41.8099	42.2964	139.258	72.1717	88.2013	68.8318
NWMN_RS04800	NWMN_0853	fabH	291.778	4.39495	85.2175	6.73233	94.7815	22.9986	111.953	3.06336
NWMN_RS04805	NWMN_0854	fab	449.516	38.9597	429.383	38.0836	328.868	21.4822	176.141	12.512
NWMN_RS04810	NWMN_0855	oppB	20.539	4.17985	14.4178	13.1298	6.61437	11.4564	4.21318	1.87789
NWMN_RS04815	NWMN_0856	oppB	12.2953	3.06663	14.9122	14.4422	19.4948	20.586	15.4234	4.83529
NWMN_RS04820	NWMN_0857	oppC	12.3635	2.88697	23.9714	7.74703	15.6648	2.02508	56.8414	27.8621
NWMN_RS04825	NWMN_0858	oppD	15.6577	3.49791	20.8084	4.0547	31.01	8.08443	45.061	6.49793
NWMN_RS04830	NWMN_0859	oppF	14.1328	4.3453	27.1909	8.94149	28.928	3.78853	26.7734	12.2465
NWMN_RS04835	NWMN_0860	oppA	20.5081	5.36345	53.4088	13.9613	62.0133	13.6613	53.3984	9.34717
NWMN_RS04840	NWMN_0861	oppA	2.34867	1.8754	16.1233	3.80637	17.1766	5.39435	13.2954	3.90699
NWMN_RS04845	NWMN_0862	appF	2.30037	1.20817	10.4141	8.62689	3.70398	6.41549	12.0316	4.16698
NWMN_RS04850	NWMN_0863	appF	6.8618	0.576252	4.70071	6.72451	8.04127	7.02252	8.65373	2.91883
NWMN_RS04855	NWMN_0864	oppB	14.1511	2.65792	7.10041	10.8068	9.92165	8.78337	17.4048	2.57413
NWMN_RS04860	NWMN_0865	oppC	11.463	0.646429	20.778	8.81711	29.6003	24.2413	57.5453	33.8511
NWMN_RS04865	NWMN_0866	trpS	182.637	29.8041	94.4071	12.3365	93.1536	30.6094	80.5587	17.0678
NWMN_RS04870	NWMN_0867	spxA	1354.96	295.537	5418.23	698.317	3942.64	1038.17	3206.96	76.2317
NWMN_RS04875	NWMN_0868		355.428	33.6723	657.553	54.5017	682.499	165.833	315.18	37.0387
NWMN_RS04880	NWMN_0869		5.38465	0.23137	0.589678	0.55291	8.56691	7.61836	14.8254	4.42277
NWMN_RS04885	NWMN_0870	pepF	212.908	43.1889	45.2932	14.5978	83.6805	7.1461	100.443	22.5594
NWMN_RS04890	NWMN_0872	yjbH	72.3865	6.00721	480.084	39.3263	215.692	17.7764	57.3198	23.9003
NWMN_RS04895	NWMN_0873	yjbI	71.1242	3.94382	420.953	99.4047	136.57	37.7053	53.0197	39.3291
NWMN_RS04900	NWMN_0874		60.116	9.37721	63.403	16.9849	47.5506	32.5955	31.5958	28.2518
NWMN_RS04905	NWMN_0875		120.618	13.5981	96.9455	30.5278	60.4818	15.4662	62.1195	53.9352
NWMN_RS04910	NWMN_0876		145.842	17.9174	329.061	40.7589	118.563	39.7969	85.2675	16.5229
NWMN_RS04915	NWMN_0877	ppnK, nadK	171.784	15.6798	366.657	76.2789	178.577	32.9759	129.057	20.8442
NWMN_RS04920	NWMN_0878		56.8176	4.15005	61.6872	4.50005	31.2773	19.5372	28.7301	4.42873
NWMN_RS04925	NWMN_0879	mgtE	58.8155	4.91328	72.3106	9.91106	61.4599	26.3468	39.4826	21.9816
NWMN_RS04930	NWMN_0880		70.1028	6.792	96.5363	16.8143	69.3882	23.7514	31.0714	3.86192
NWMN_RS04935	NWMN_0881	fabI	342.885	4.64662	401.809	99.3211	270.871	34.8099	248.321	40.0564
NWMN_RS04940	NWMN_0882		181.907	42.1438	40.1729	16.2526	54.4574	16.0219	72.638	24.1639
NWMN_RS04945	NWMN_0883		16.9262	2.54567	22.2189	6.55675	35.7976	14.5972	36.093	4.83045
NWMN_RS04950	NWMN_0884		26.0988	4.41424	42.2015	18.5807	17.7722	3.36443	16.8394	2.79999
NWMN_RS04955	NWMN_0885		132.683	20.5872	521.392	100.891	320.152	95.3394	522.6	86.2466
NWMN_RS04960	NWMN_0886		99.5162	4.62792	67.1606	14.0212	57.1382	24.3576	32.0478	8.7607
NWMN_RS04965	NWMN_0887	murG, ugtP	120.495	7.97269	82.1723	27.6924	48.2648	15.2337	91.6361	27.4255
NWMN_RS04970	NWMN_0888	murE	73.7578	5.0511	62.1198	8.21323	59.5338	6.33015	52.6925	17.039
NWMN_RS04975	NWMN_0889		87.8395	5.43874	45.2858	4.13154	47.4878	37.7454	61.0105	23.9115
NWMN_RS04980	NWMN_0890	prfC	115.896	6.91142	89.0641	22.0349	81.442	5.01617	72.3277	11.3044
NWMN_RS04985	NWMN_0891		223.355	13.2847	83.0647	28.2904	128.64	52.5044	88.032	52.3708
NWMN_RS04990	NWMN_0892	htrA	51.217	6.37104	31.3304	3.6796	28.5212	1.3207	29.4225	3.5113
NWMN_RS04995	NWMN_0893		78.5824	4.8513	117.078	2.54436	60.2341	20.2306	44.6325	5.18336
NWMN_RS05000	NWMN_0894		43.3895	4.7803	56.3554	13.8161	48.0175	2.87815	21.3053	5.16095
NWMN_RS05015	NWMN_0895	comK	9.38377	3.13019	8.01003	12.2732	23.4081	16.4143	6.19662	3.36519
NWMN_RS05020	NWMN_0896		22.4962	4.89461	517.418	174.129	742.954	440.707	167.574	69.6389
NWMN_RS05025	NWMN_0897		66.9933	6.18495	58.368	3.66999	41.6037	11.6015	47.9037	30.5873
NWMN_RS05030	NWMN_0898		397.927	72.6933	191.063	98.8669	123.894	35.375	85.3981	54.563
NWMN_RS05035	NWMN_0899		427.634	101.926	124.539	12.5423	143.305	17.1653	67.4041	31.1445
NWMN_RS05040			0	1.25977	0.633786	0.587749	0	0	0	0
NWMN_RS05045			0.557703	0.77345	0.64517	0.600948	0	0	1.47467	1.36393
NWMN_RS05050	NWMN_0901		3.38979	0.584618	5.42161	7.68915	15.8653	7.24867	8.03199	0.737777
NWMN_RS05055	NWMN_0902		5.30146	0.659949	0.679743	0.623636	14.8236	25.6752	8.4487	1.02759
NWMN_RS05060	NWMN_0903		7.65244	0.94606	28.2788	8.15067	22.6947	4.56636	11.4201	1.62026
NWMN_RS05070	NWMN_0905		29.6144	7.28874	21.9642	18.381	12.4383	11.1778	7.49244	3.04818
NWMN_RS05075	NWMN_0906	tarM	43.6048	5.31487	39.1345	6.43259	26.2211	12.584	19.5317	5.13167
NWMN_RS05080	NWMN_0907		643.008	216.332	9.42063	15.5573	33.491	40.991	28.7783	17.7324
NWMN_RS05085	NWMN_0908		14.9154	0.300515	7.25755	10.6876	19.3437	8.02801	49.7902	18.2316
NWMN_RS05090			29.7944	1.16556	30.9101	31.3206	30.6301	32.8736	36.3293	12.5801
NWMN_RS05095			42.0023	6.12299	19.1997	15.9268	13.1379	12.0867	7.59255	2.27044
NWMN_RS05100	NWMN_0910		32.8406	3.43196	28.795	12.5681	21.5459	12.4025	34.5031	20.36
NWMN_RS05105	NWMN_0911	menA	198.557	1.47034	174.996	13.9916	181.657	39.526	93.0073	34.6564
NWMN_RS05110	NWMN_0912		59.4948	2.26344	133.615	21.9082	79.8064	14.0318	99.8587	33.3437
NWMN_RS05115	NWMN_0913	menD	77.834	4.08617	157.265	9.85295	132.238	38.5951	175.569	12.6838
NWMN_RS05120	NWMN_0914	menH	85.3972	8.6027	228.664	15.7637	205.073	74.4138	103.396	65.1437
NWMN_RS05125	NWMN_0915	menB	494.122	19.0246	1216.55	68.049	1070.54	31.7928	660.762	100.079
NWMN_RS05130	NWMN_0916	sspC	21.847	5.37458	24.7473	22.0815	6.72363	11.6457	8.68072	2.24779
NWMN_RS05135	NWMN_0917	sspB	22.322	5.19875	18.965	5.82205	31.0655	10.7845	12.0869	2.35487
NWMN_RS05140	NWMN_0918	sspA	21.4419	4.76141	6.36947	8.99133	21.0585	5.75577	33.0523	9.48016
NWMN_RS05145	NWMN_0919		47.3961	3.27582	45.5046	12.3198	61.1866	8.19202	21.3634	3.80535
NWMN_RS05150	NWMN_0920		65.3762	13.2194	43.3502	7.00972	22.5643	8.56361	4.43581	0.677521
NWMN_RS05155	NWMN_0921		20.4655	3.28034	13.6263	22.4682	0	0	12.4348	4.53999
NWMN_RS05160			8.02061	1.83038	0.810746	0.712251	0	0	7.72712	6.49096
NWMN_RS05165	NWMN_0922	atl	57.8223	8.40184	206.775	22.348	225.924	39.5279	654.615	278.675
NWMN_RS05170	NWMN_0923		18.6807	1.74263	18.4032	16.1842	10.5435	9.44713	23.5687	18.9945
NWMN_RS05175	NWMN_0924		160.224	19.8117	237.037	71.6907	180.739	93.9978	83.633	19.5412
NWMN_RS05180	NWMN_0925	lcpB	137.296	19.9313	233.232	18.9171	190.391	56.7285	98.1564	38.7061
NWMN_RS05185	NWMN_0926	fmt	46.1846	7.15675	91.6128	13.183	54.6547	21.179	24.9062	13.8548
NWMN_RS05190	NWMN_0927	qoxD	630.918	36.8963	572.51	125.746	832.513	329.302	1737.33	195.199
NWMN_RS05195	NWMN_0928	qoxC	826.281	14.0424	542.912	103.061	899.048	259.72	2425.85	210.908
NWMN_RS05200	NWMN_0929	qoxB	791.483	16.1602	841.425	78.9418	1036.52	260.442	2461.87	81.1942
NWMN_RS05205	NWMN_0930	qoxA	717.551	26.843	836.637	19.6435	785.876	136.457	2030.95	129.083
NWMN_RS05210			5.34242	2.31806	0.859438	0.762384	0	0	4.50254	2.09386
NWMN_RS05215	NWMN_0931		561.784	78.802	1011.58	36.2102	723.996	234.713	364.539	35.7929
NWMN_RS05220	NWMN_0932	folD	120.444	26.5812	522.723	70.9492	334.323	105.185	164.323	37.2553
NWMN_RS05225	NWMN_0933	purE	73.8138	41.949	15.115	12.2613	52.6394	24.7159	108.836	126.016
NWMN_RS05230	NWMN_0934	purK	96.8392	53.6935	9.76601	14.6033	50.2297	15.8784	151.968	139.504
NWMN_RS05235	NWMN_0935	purC	53.5042	26.2948	0.908465	0.803112	42.0026	31.4927	75.913	52.683
NWMN_RS05240			84.909	45.356	9.50572	15.1364	44.1271	38.2153	139.608	140.758
NWMN_RS05245	NWMN_0936	purQ	67.8302	33.5674	17.5371	14.964	79.7119	40.3873	183.8	126.525
NWMN_RS05250	NWMN_0937	purL	69.5662	32.5976	29.1212	5.86514	84.6358	45.1068	162.641	120.91
NWMN_RS05255	NWMN_0938	purF	81.1452	36.3574	47.0171	14.1762	113.097	54.8748	171.81	148.703
NWMN_RS05260	NWMN_0939	purM	87.4331	40.0362	37.1851	12.3619	100.437	52.7323	226.184	163.943
NWMN_RS05265	NWMN_0940	purN	92.0836	42.9152	49.697	26.9414	106.942	5.02347	175.843	141.383
NWMN_RS05270	NWMN_0941	purH	100.699	46.7741	68.0872	10.2649	174.718	85.4475	215.22	159.962
NWMN_RS05275	NWMN_0942	purD	136.718	63.4477	96.1009	12.6137	222.839	69.7875	249.19	245.858
NWMN_RS05280	NWMN_0943		36.714	26.6864	48.8041	10.8735	52.7239	28.4712	7.58484	1.55868
NWMN_RS05285	NWMN_0944		51.5566	48.2504	65.9867	3.24511	47.6958	6.71471	18.2841	7.46506
NWMN_RS05290	NWMN_0945		41.6902	42.0609	48.604	24.2037	52.4144	36.1652	11.8372	1.99553
NWMN_RS05295			3.65433	1.00755	0.941865	0.83691	0	0	22.2221	31.0788
NWMN_RS05300			51.8124	5.17718	44.3691	4.08684	74.1771	69.7469	133.628	128.934
NWMN_RS05305	NWMN_0946	auxA	338.866	66.0398	268.992	39.0582	256.828	55.7861	217.775	22.4302
NWMN_RS05310	NWMN_0947		49.3361	3.59091	47.9175	7.22831	19.3764	5.70507	22.5573	9.90474
NWMN_RS05315	NWMN_0948		115.964	5.16271	79.8629	27.5817	75.4209	21.6239	152.633	84.2941
NWMN_RS05320	NWMN_0949	ptsH	1016.75	30.8578	766.07	177.567	717.299	193.497	1465.89	312.625
NWMN_RS05325	NWMN_0950	ptsI	1033.43	26.91	1651.91	91.179	1246.86	109.931	1534.82	238.687
NWMN_RS05330	NWMN_0951		88.3998	22.3024	52.8387	20.7444	19.3389	20.4103	11.9203	5.08175
NWMN_RS05335	NWMN_0952	cydA	107.363	30.3742	73.4195	23.9434	87.2597	42.1152	59.4971	10.789
NWMN_RS05340	NWMN_0953	cydB	108.967	22.4074	59.9635	20.979	62.1345	34.0819	101.391	9.87803
NWMN_RS05345	NWMN_0954	trkA	150.592	7.86165	62.2481	12.7166	90.7472	3.27418	113.968	34.7749
NWMN_RS05350	NWMN_0955		104.311	5.89921	9.43961	13.8613	26.6426	28.9837	65.8568	23.708
NWMN_RS05355	NWMN_0956	rnj	362.304	13.5818	451.092	44.8	282.672	29.9587	277.127	29.3074
NWMN_RS05360			301.758	14.9181	150.766	52.8785	94.1874	48.2395	266.977	73.6481
NWMN_RS05365			151.408	25.7678	99.4286	28.3958	22.6081	20.4414	43.1957	27.188
NWMN_RS05370	NWMN_0957	def	212.407	15.3192	152.754	29.5949	145.76	57.1036	53.1186	34.9728
NWMN_RS05375	NWMN_0958		339.464	70.4695	239.965	47.8989	156.007	57.9189	130.761	29.8898
NWMN_RS05380	NWMN_0959	pdhA	1173.06	20.9179	1161.82	125.927	713.482	89.4437	926.941	133.276
NWMN_RS05385	NWMN_0960	pdhB	1037.84	38.9348	1312.17	133.239	966.408	131.386	804.426	100.634
NWMN_RS05390	NWMN_0961	pdhC	1303.96	15.685	2151.1	139.801	1575.96	229.045	902.213	81.8964
NWMN_RS05395	NWMN_0962	pdhD	1398.91	35.2462	3344.94	94.794	2643.58	528.514	1008.42	226.798
NWMN_RS05400	NWMN_0963		40.1107	1.13822	55.6287	26.3231	61.9067	53.6132	25.614	14.6163
NWMN_RS05405	NWMN_0964		50.1573	2.27324	17.1511	13.5361	15.1302	2.40253	21.6765	13.1863
NWMN_RS05410	NWMN_0965	potA	49.6738	1.51439	32.5003	10.1607	29.0937	17.864	41.0097	12.3888
NWMN_RS05415	NWMN_0966	potB	44.7815	4.65816	29.0816	6.46117	15.4671	6.56957	17.4621	9.82382
NWMN_RS05420	NWMN_0967	potC	50.386	2.13444	36.7348	16.0914	6.20332	10.7445	9.95303	4.52719
NWMN_RS05425	NWMN_0968	potD	59.0781	3.98746	80.6759	7.92027	47.6729	18.4116	29.1065	15.5404
NWMN_RS05430	NWMN_0969	auxB	309.766	50.3676	581.055	67.6435	405.173	23.5769	286.266	15.4245
NWMN_RS05435	NWMN_0970		136.865	35.2738	122.969	41.6638	107.001	27.5068	92.5953	43.0008
NWMN_RS05440	NWMN_0971	mntH	652.37	85.4757	951.259	78.731	621.773	211.458	645.934	364.064
NWMN_RS05445	NWMN_0972		194.211	22.3148	83.3037	29.1892	71.2205	55.8717	88.4247	32.2055
NWMN_RS05450	NWMN_0973		79.3576	3.42837	598.8	128.564	491.154	25.8887	132.435	56.2055
NWMN_RS05455			192.206	77.4498	226.432	146.85	220.288	64.7925	59.4712	46.5892
NWMN_RS05460	NWMN_0974	typA	312.956	44.8677	136.112	10.5073	121.682	38.4476	82.9166	11.5728
NWMN_RS05465	NWMN_0975		86.6549	7.83709	12.3278	19.9235	60.3272	19.1913	49.8751	27.5167
NWMN_RS05470	NWMN_0976		95.2371	11.5234	102.217	11.1973	86.9305	22.1634	31.6817	6.92362
NWMN_RS05475	NWMN_0977		399.66	8.68444	218.303	30.9969	210.533	58.1874	179.768	77.7003
NWMN_RS05480	NWMN_0978		126.232	6.31052	69.2137	8.0239	88.7465	9.85226	45.223	16.5632
NWMN_RS05485	NWMN_0979	pycA	79.6847	27.6965	108.669	13.0963	263.014	21.6276	408.037	89.7746
NWMN_RS05490	NWMN_0980	ctaA	95.2816	2.42223	63.161	10.2218	90.722	31.3066	214.961	59.5766
NWMN_RS05495	NWMN_0981	ctaB	295.029	17.0138	54.5495	29.1418	118.113	55.7146	324.547	57.7326
NWMN_RS05500	NWMN_0982		264.315	37.8331	58.5399	27.4675	61.6786	11.6745	220.59	70.8921
NWMN_RS05505			20.6462	4.48486	12.0188	18.2572	0	0	14.0421	7.84375
NWMN_RS05510	NWMN_0983		76.8709	4.50586	91.4762	7.62583	81.4859	27.9989	60.6756	24.337
NWMN_RS05515			62.5407	3.42134	99.1725	14.4743	69.9913	57.1507	39.399	30.4071
NWMN_RS05520	NWMN_0984		70.5624	4.69787	51.107	15.7414	82.8478	26.9792	32.3558	0.756129
NWMN_RS05525	NWMN_0985		91.6446	9.63974	50.8826	9.13763	23.8319	12.8433	16.6756	10.8267
NWMN_RS05530	NWMN_0986		87.6598	1.84173	10.4007	15.3888	4.63486	8.02781	33.8047	17.197
NWMN_RS05535	NWMN_0987		77.9097	0.562273	87.6304	20.6556	49.0647	35.7638	61.661	40.0777
NWMN_RS05540	NWMN_0988	coaD	122.028	2.16366	72.6949	40.295	88.1758	57.1144	84.3722	16.0288
NWMN_RS05545	NWMN_0989		50.8708	2.06953	25.6837	8.80162	16.1215	5.02778	21.9029	3.16641
NWMN_RS05550	NWMN_0990		2193.7	222.804	801.409	118.424	615.449	100.773	392.086	74.5824
NWMN_RS05555			1105.63	31.8559	1.02317	0.911771	0	0	328.305	13.3978
NWMN_RS05560	NWMN_0991	rpmF	1137.08	295.7	537.973	99.737	519.769	143.985	431.027	120.4
NWMN_RS05565	NWMN_0992	ccrB	27.3733	4.86264	42.7399	9.20122	37.0469	20.3658	38.6344	13.9963
NWMN_RS05570			39.3275	5.56456	1.03858	0.926454	0	0	45.0907	42.2158
NWMN_RS05575	NWMN_0993		81.2946	7.0757	164.966	36.089	67.3705	1.74133	39.5276	9.2669
NWMN_RS05580	NWMN_0994		102.472	11.4571	128.111	7.01951	97.2554	39.0251	103.367	28.7157
NWMN_RS05585			9.26599	98.1012	45.1172	48.9571	110.496	3.68085	10.9925	5.58498
NWMN_RS05590	NWMN_0995		18.5197	139.727	173.703	19.923	243.696	139.477	150.4	65.9174
NWMN_RS05595			13.3608	59.6599	32.0789	29.6191	33.2444	14.0088	10.9241	5.82482
NWMN_RS05600			316.342	37.8713	236.345	128.745	226.468	142.891	120.241	110.974
NWMN_RS05605			64.3839	26.5702	56.0051	15.6904	114.19	75.2836	34.4834	36.1113
NWMN_RS05610	NWMN_0996		7.41077	52.7938	62.9314	37.1412	85.7544	45.8101	46.6449	25.2933
NWMN_RS05615	NWMN_0997		7.82306	45.7361	52.3056	20.0628	81.3338	55.6045	125.714	79.3131
NWMN_RS05620	NWMN_0998		7.32694	46.5596	61.695	29.3523	114.316	43.6073	35.2846	12.0995
NWMN_RS05625	NWMN_0999		9.63424	59.3526	69.3471	19.7996	178.116	106.172	79.6872	58.13
NWMN_RS05630	NWMN_1000		11.9397	84.2375	182.864	2.83249	112.589	13.1254	45.4865	8.17389
NWMN_RS05635	NWMN_1001		11.8307	63.777	171.643	19.1994	125.119	111.081	29.9981	22.2208
NWMN_RS05640	NWMN_1002		254.33	14.9819	162.684	12.1254	129.995	22.4236	235.403	64.5764
NWMN_RS05645	NWMN_1003		9.88513	47.7907	81.6732	70.7863	123.627	23.8701	24.8941	13.8351
NWMN_RS05650	NWMN_1004		12.18	55.1062	88.6723	28.691	72.225	6.87634	90.5123	50.922
NWMN_RS05655			9.98036	31.7452	32.3665	26.9808	42.9567	38.1047	38.9115	24.2339
NWMN_RS05660			10.5782	44.1764	43.6623	7.42278	63.3336	37.8727	110.391	43.6197
NWMN_RS05665	NWMN_1005		9.34771	36.1027	61.2734	19.5094	48.2271	17.3096	58.0585	15.9094
NWMN_RS05670			9.70514	32.5073	53.2233	39.0679	37.3272	32.97	77.6037	61.8582
NWMN_RS05675	NWMN_1006		13.9722	41.2642	67.5056	15.1953	81.5929	46.3342	153.943	88.8097
NWMN_RS05680	NWMN_1007		13.7915	38.9652	40.0932	17.7103	60.166	16.7207	97.9156	97.4089
NWMN_RS05685	NWMN_1008		11.7591	47.9757	64.6977	31.9366	62.524	40.466	157.218	112.248
NWMN_RS05690	NWMN_1009		11.4238	44.6582	39.6226	32.971	77.5122	35.6887	116.374	59.4415
NWMN_RS05695			8.65234	33.7996	32.1477	29.5994	36.147	21.3952	40.7235	23.5304
NWMN_RS05700	NWMN_1010		12.4098	38.5295	39.8854	16.7649	39.4781	23.4464	127.887	96.6448
NWMN_RS05705	NWMN_1011		12.4838	37.5976	34.2045	30.235	49.4536	29.722	85.3248	49.9948
NWMN_RS05710			11.1928	41.521	39.0532	11.7924	39.9994	25.5854	131.831	76.9454
NWMN_RS05715	NWMN_1012		11.2888	38.2918	47.7867	15.3196	59.0142	24.0163	60.7685	15.8058
NWMN_RS05720			14.6919	32.9952	64.4398	41.4739	63.7899	58.6439	102.118	46.5514
NWMN_RS05725			10.9047	24.4199	31.5206	25.7927	6.22645	10.7845	93.3236	21.7014
NWMN_RS05730			13.3077	23.9345	50.7075	28.491	56.0009	23.8911	173.469	75.3185
NWMN_RS05735			9.1804	23.0604	57.7482	55.0026	26.2359	45.4419	162.949	93.4947
NWMN_RS05740	NWMN_1013		15.2312	37.7829	98.6909	29.2071	113.344	34.4617	105.508	46.0331
NWMN_RS05745	NWMN_1014		7.42167	44.9743	89.5435	5.08058	123.964	88.9232	56.5848	45.2291
NWMN_RS05750	NWMN_1015		6.30713	46.3546	41.9501	4.10559	63.2698	34.3614	26.3725	8.71966
NWMN_RS05755	NWMN_1016		8.41626	59.4027	51.5141	12.8123	69.1634	2.50079	63.1603	34.2617
NWMN_RS05760	NWMN_1017		8.67497	54.7197	47.3523	4.54776	65.4056	8.63056	60.9771	41.4419
NWMN_RS05765			6.78659	45.2222	40.3704	34.9367	22.4892	38.9524	39.5799	27.7445
NWMN_RS05770	NWMN_1018		23.7337	451.328	120.839	47.1322	197.229	100.854	258.152	137.554
NWMN_RS05775	NWMN_1019		11.2026	207.843	71.7258	11.427	57.4256	53.517	23.7157	8.57986
NWMN_RS05780	NWMN_1020		7.38279	101.522	38.2988	10.1576	93.8547	35.9304	9.54874	3.93517
NWMN_RS05785	NWMN_1021		9.65367	107.228	66.1314	12.8259	59.6223	48.4426	34.89	10.864
NWMN_RS05790	NWMN_1022		10.6208	109.099	24.3304	19.5602	27.6621	29.7033	35.3947	11.9129
NWMN_RS05795	NWMN_1023		8.69914	109.525	38.9791	24.8931	74.2157	27.0953	77.2586	60.5828
NWMN_RS05800	NWMN_1024		4.29653	78.0287	25.6794	41.4349	56.6768	52.1766	66.3711	44.6881
NWMN_RS05805	NWMN_1025		11.1101	107.013	61.3919	16.4714	93.604	37.3205	61.0074	13.5251
NWMN_RS05810	NWMN_1026		4.96053	47.0084	38.9808	14.2946	68.7414	32.8054	50.3207	39.9067
NWMN_RS05815	NWMN_1027		4.78715	46.8179	30.0372	10.2545	4.80214	8.31756	43.5157	46.8872
NWMN_RS05820	NWMN_1028		8.97469	45.984	46.0656	7.81045	48.2316	13.5132	23.4777	7.07271
NWMN_RS05825	NWMN_1029		4.70012	32.4541	30.9735	11.3188	27.757	12.0277	57.1868	50.7899
NWMN_RS05830	NWMN_1030		4.30149	29.7416	38.6069	5.35767	36.8463	18.5341	39.4716	24.4037
NWMN_RS05835	NWMN_1031		7.01905	29.8413	38.2429	7.65314	32.7646	10.2623	46.774	24.2471
NWMN_RS05840	NWMN_1032		0.99788	19.2886	20.951	5.18982	12.1771	11.092	2.93392	2.55671
NWMN_RS05845	NWMN_1033		6.10189	36.2035	22.7454	25.3152	20.3514	20.7388	39.4783	22.0906
NWMN_RS05850			13.7096	96.2052	30.4473	32.5493	32.651	56.5532	182.017	145.986
NWMN_RS05855	NWMN_1034		2.11803	21.9112	10.4955	16.7532	5.07171	8.78152	20.0941	8.82055
NWMN_RS05860	NWMN_1035		2.99699	20.468	13.1165	11.3682	16.2051	4.88234	10.1927	2.06306
NWMN_RS05865	NWMN_1036		6.51559	23.335	6.81534	10.3669	32.8583	6.72594	13.9506	8.47421
NWMN_RS05870	NWMN_1037		7.49022	21.6223	33.0102	5.30378	47.4058	22.2989	21.4299	5.06257
NWMN_RS05875	NWMN_1038		2.96486	21.244	23.3554	7.73642	32.7092	13.2602	44.166	17.5734
NWMN_RS05880	NWMN_1039		14.2749	18.8853	21.6605	10.4693	36.5076	8.89005	113.54	57.6436
NWMN_RS05885	NWMN_1040	isdB	16.7434	3.9497	18.0635	14.3753	119.333	72.6923	391.432	91.2301
NWMN_RS05890	NWMN_1041	isdA	89.5304	18.1462	35.1669	11.3316	359.383	171.585	1072.29	194.532
NWMN_RS05895	NWMN_1042	isdC	18.3459	1.86464	12.7611	9.48268	191.333	49.5897	296.328	23.9539
NWMN_RS05900	NWMN_1043	isdD	19.2883	1.47149	7.42268	9.64529	71.4523	22.8344	208.165	28.6936
NWMN_RS05905	NWMN_1044	isdE	17.8174	1.70079	11.7574	8.63693	104.385	39.4621	183.141	61.1896
NWMN_RS05910	NWMN_1045	isdF	17.589	0.623149	16.5142	3.52502	92.6963	24.3354	127.782	49.501
NWMN_RS05915	NWMN_1046	srtB	17.1423	0.926139	1.26023	1.09696	56.3724	11.0663	80.578	60.0529
NWMN_RS05920	NWMN_1047	isdG	20.8479	2.11265	18.461	14.5512	64.0012	47.8256	187.858	57.4378
NWMN_RS05925			3.90409	2.0882	1.28374	1.11652	0.00128421	0.00222432	4.12854	2.39994
NWMN_RS05930	NWMN_1048		69.9701	6.8039	51.1225	8.90917	52.2403	12.4402	92.6268	70.9694
NWMN_RS05935	NWMN_1049	pheS	126.386	2.51053	61.7807	15.8459	51.4406	25.7889	62.366	19.36
NWMN_RS05940	NWMN_1050	pheT	153.841	2.89167	100.011	6.70774	106.255	9.56429	71.3745	3.70997
NWMN_RS05945	NWMN_1051	rnhC	44.9444	3.00614	35.1251	16.4956	17.7087	4.93571	35.614	13.6247
NWMN_RS05950	NWMN_1053		99.7915	8.79733	96.8753	31.9192	55.5598	42.2321	49.8304	31.2694
NWMN_RS05955	NWMN_1054		87.963	12.9431	92.8782	13.7757	52.1064	14.5517	38.705	18.6668
NWMN_RS05960	NWMN_1055	rpoD	57.6608	2.41188	82.0511	21.9774	46.9001	11.7787	23.0421	2.78314
NWMN_RS05965	NWMN_1056	mutS2	82.271	7.17523	98.5956	13.4988	67.2273	19.0722	46.8453	6.88073
NWMN_RS05970	NWMN_1057	trxA	659.609	68.6448	3345.43	989.801	2089.65	208.765	443.569	53.322
NWMN_RS05975			29.6837	2.00866	1.30287	1.13361	0.00293136	0.00507726	23.845	27.0086
NWMN_RS05980	NWMN_1058	uvrC	47.7178	1.15196	96.0876	14.143	53.9407	6.96328	25.2241	7.92603
NWMN_RS05985	NWMN_1060	sdhC	68.657	12.6727	391.687	41.3359	178.49	88.1259	61.0666	55.7351
NWMN_RS05990	NWMN_1061	sdhA	103.144	16.6345	1424.42	77.1651	751.742	151.232	156.193	48.0984
NWMN_RS05995	NWMN_1062	sdhB	124.947	19.9174	1933.52	237.751	1499.77	303.009	204.144	60.4693
NWMN_RS06000	NWMN_1063	murI	126.426	9.67493	203.859	40.444	158.6	66.2703	97.9628	38.6565
NWMN_RS06005	NWMN_1064		129.991	3.80938	249.045	27.8356	134.047	76.1109	100.057	26.9365
NWMN_RS06010	NWMN_1065		157.162	14.5669	134.607	13.9513	112.171	57.0879	50.8832	17.5003
NWMN_RS06015			2.72729	0.331158	1.3219	1.14927	0.00293136	0.00507726	8.41406	5.62787
NWMN_RS06020	NWMN_1066	ecb	774.072	1480.33	639.862	52.6624	566.19	479.326	1997.71	540.056
NWMN_RS06025			90.395	15.6153	135.286	62.6514	122.743	63.3238	430.096	153.063
NWMN_RS06030	NWMN_1067	flr	157.855	13.8049	223.448	79.0726	685.424	212.682	1052.6	373.812
NWMN_RS06035	NWMN_1068		62.1144	9.72126	19.3798	4.69655	54.4907	11.568	19.959	9.97271
NWMN_RS06040	NWMN_1069	efb, fib	855.76	473.564	761.413	200.615	541.375	348.981	1207.64	531.183
NWMN_RS06045	NWMN_1070	scb	908.036	346.366	625.353	96.6944	408.143	187.715	866.342	496.25
NWMN_RS06065	NWMN_1071		97.9765	21.7173	32.6181	27.8094	16.5142	28.6034	26.9237	27.1221
NWMN_RS06070			90.5748	40.5855	38.8935	10.3712	51.3088	48.1079	20.8088	5.41694
NWMN_RS06075	NWMN_1072		164.562	45.3163	78.2443	28.8311	102.72	16.1702	35.497	25.0741
NWMN_RS06080	NWMN_1073	hla	47.1815	12.5551	405.153	77.9468	412.921	254.64	975.835	416.99
NWMN_RS06085			18.3682	5.05365	1.34662	1.17099	0.00364439	0.00631227	5.82965	5.10933
NWMN_RS06090	NWMN_1074		25.0672	1.70205	98.4128	71.5669	15.9773	15.2473	12.5068	8.93919
NWMN_RS06095	NWMN_1075	ssl12	16.3665	4.14992	68.2347	11.5277	510.081	447.775	85.8793	20.8483
NWMN_RS06100	NWMN_1076	ssl13	16.2769	4.59793	59.94	6.58349	499.193	529.937	50.3513	36.2376
NWMN_RS06105	NWMN_1077	ssl14	17.9167	5.09893	69.7233	20.0769	446.588	356.642	65.7716	42.4239
NWMN_RS06110	NWMN_1078	argF	4.18328	1.58379	13.0972	9.51147	14.3706	3.09974	439.376	249.955
NWMN_RS06115	NWMN_1079	arcC	8.22298	1.60526	19.6041	16.3842	12.2993	12.8774	589.223	290.249
NWMN_RS06120	NWMN_1080		21.7563	1.72912	24.9991	2.1445	29.7971	9.34068	369.315	10.2887
NWMN_RS06125			61.735	6.15159	20.7869	16.1491	27.6192	26.4929	47.0708	44.4371
NWMN_RS06130	NWMN_1082	eta	7.08601	1.20609	20.547	3.04955	39.4856	21.1609	11.6755	3.61493
NWMN_RS06135			0	0	1.38032	1.20058	0.0092631	0.0160442	1.67244	2.89675
NWMN_RS06145	NWMN_1084	psm beta1	1502.58	778.93	87.5846	34.812	48.7451	14.2835	253.768	186.662
NWMN_RS06150	NWMN_2620	psm beta-2	899.548	454.82	87.472	18.9549	97.1473	30.1402	210.517	79.5696
NWMN_RS06155	NWMN_1085		56.4177	9.48483	38.8149	13.451	33.8898	25.3268	15.4476	5.99484
NWMN_RS06160	NWMN_1086		119.414	16.7575	431.456	66.2256	321.547	174.273	128.671	58.1378
NWMN_RS06165	NWMN_1087	bshC	69.3529	4.53002	239.827	9.54058	133.776	27.7185	59.7869	11.8485
NWMN_RS06170	NWMN_1088	mraZ	496.08	27.0448	378.542	47.1829	316.606	93.6169	191.98	37.7205
NWMN_RS06175	NWMN_1089	mraW, rsmH	375.285	10.9482	233.613	48.0243	198.045	22.5235	121.378	25.3918
NWMN_RS06180	NWMN_1090	ftsL	350.647	17.9883	138.519	44.5116	165.427	26.2981	115.018	3.44287
NWMN_RS06185	NWMN_1091	pbpA	181.021	17.0587	57.9664	16.839	69.6683	18.3837	43.0536	7.52574
NWMN_RS06190	NWMN_1092	mraY	119.81	8.82728	22.4004	1.09758	16.2003	15.9387	46.5493	24.716
NWMN_RS06195	NWMN_1093	murD	133.404	16.6674	50.0355	11.3424	39.7712	9.54001	45.8668	18.0824
NWMN_RS06200	NWMN_1094	div1b	161.576	12.9532	72.8586	12.4135	59.4152	10.176	57.3671	30.1245
NWMN_RS06205	NWMN_1095	ftsA	643.569	21.6965	307.094	30.983	275.463	18.331	590.582	125.844
NWMN_RS06210	NWMN_1096	ftsZ	987.724	59.743	922.91	99.4416	1024.01	41.8873	1197.69	171.399
NWMN_RS06215	NWMN_1097		58.4439	7.78413	39.3413	7.30348	69.0683	28.9639	28.3161	15.9673
NWMN_RS06220	NWMN_1098		415.618	33.528	260.04	44.457	331.261	56.1712	283.776	74.1415
NWMN_RS06225	NWMN_1099	sepF	476.52	41.1097	382.873	12.681	308.423	73.0186	435.208	143.462
NWMN_RS06230	NWMN_1100		290.835	30.2852	186.308	51.0436	188.09	127.522	256.6	23.5286
NWMN_RS06235	NWMN_1101		124.86	20.7843	85.9581	34.4259	53.5895	16.4218	32.2023	16.363
NWMN_RS06240	NWMN_1102		417.92	19.7509	493.711	175.738	425.265	69.3577	329.759	73.7741
NWMN_RS06245	NWMN_1103	ileS	220.842	4.86142	64.6507	13.9224	110.812	28.062	90.0466	31.6696
NWMN_RS06250	NWMN_1105		56.0262	1.50527	75.8389	41.9477	49.1117	15.1763	22.1802	1.71309
NWMN_RS06255	NWMN_1106	tnp	12.9504	0.814986	1.38572	1.20489	0.0137664	0.023844	9.96983	9.20462
NWMN_RS06260	NWMN_1107	lspA	85.2449	9.17705	83.9543	42.0708	27.1453	5.00705	25.501	12.8644
NWMN_RS06265	NWMN_1108		147.048	13.3761	141.998	17.0115	111.485	39.805	51.9261	24.2485
NWMN_RS06270	NWMN_1109	pyrR	572.431	198.949	37.2945	10.9433	61.1875	16.8067	59.3661	12.9711
NWMN_RS06275	NWMN_1110	pyrP	355.416	194.84	19.9676	1.11669	25.6867	7.85944	39.3595	17.8286
NWMN_RS06280	NWMN_1111	pyrB	397.138	237.475	18.874	3.63278	19.2177	6.50415	25.6746	11.6187
NWMN_RS06285	NWMN_1112	pyrC	447.486	268.599	20.285	6.01026	33.9195	7.38189	28.7023	16.5444
NWMN_RS06290	NWMN_1113	pyrAA	425.07	259.989	24.6497	19.8645	24.0619	9.36657	22.2127	9.85336
NWMN_RS06295	NWMN_1114	carB	469.698	304.299	28.4682	2.1742	33.2935	1.55157	29.0102	11.4741
NWMN_RS06300	NWMN_1115	pyrF	445.852	296.569	39.7525	26.3806	44.7897	16.1965	15.2923	7.95394
NWMN_RS06305	NWMN_1116	pyrE	464.199	306.63	34.1327	3.12537	43.7977	13.6224	19.3477	8.72455
NWMN_RS06310	NWMN_1117		355.279	229.703	123.257	38.7831	75.2358	6.57091	9.93362	5.45307
NWMN_RS06315	NWMN_1118		117.494	37.2192	139.905	69.2882	46.4787	39.5001	65.9874	19.0396
NWMN_RS06320	NWMN_1119		75.6117	4.96122	141.542	15.713	74.9393	5.21923	35.1918	5.92344
NWMN_RS06325	NWMN_1120	gmk	456.154	43.3423	125.394	32.5006	151.368	2.83419	266.069	8.53634
NWMN_RS06330			301.473	19.1197	120.122	56.6	109.349	44.3281	167.485	77.1643
NWMN_RS06335	NWMN_1121	coaBC	51.3196	1.69203	80.4554	11.9957	42.0537	4.82081	35.9477	17.1837
NWMN_RS06340	NWMN_1122	priA	67.5461	3.26248	72.9854	8.28647	60.0908	11.2243	80.1043	17.8746
NWMN_RS06345	NWMN_1123		15.5316	0.610389	5.59978	6.02397	8.34177	14.4113	38.5471	21.3251
NWMN_RS06350	NWMN_1124		205.377	23.727	563.943	27.3399	617.768	227.794	615.868	260.415
NWMN_RS06355	NWMN_1125	def	100.758	7.60887	100.488	43.8463	65.0625	14.1779	81.5555	7.94092
NWMN_RS06360	NWMN_1126	fmt	119.609	4.32281	125.182	5.79887	85.2542	20.5671	72.7129	28.8079
NWMN_RS06365	NWMN_1127	sun	123.938	4.82254	112.463	21.8593	102.349	25.1749	84.693	10.1388
NWMN_RS06370	NWMN_1128	rimN	165.118	6.42585	88.8188	18.1619	95.1616	30.5113	98.3482	39.0978
NWMN_RS06375	NWMN_1129		142.015	5.50495	75.7755	21.3495	55.0393	5.8179	75.6354	44.8875
NWMN_RS06380	NWMN_1130	pknB, prkC	201.2	5.03906	203.621	23.1582	163.848	38.1873	108.55	34.1002
NWMN_RS06385	NWMN_1131	rsgA	64.5225	4.03062	113.588	11.1773	51.9428	15.5195	68.8694	22.5441
NWMN_RS06390	NWMN_1132	cfxE	76.1417	1.04411	149.246	49.7727	100.975	38.1293	31.5381	5.63645
NWMN_RS06395	NWMN_1133		77.095	4.67813	108.21	15.681	67.6357	28.2507	52.3913	15.9721
NWMN_RS06400	NWMN_1134	rpmB	8597.96	565.092	2871.16	512.27	6351.1	550.521	4193.45	182.792
NWMN_RS06405	NWMN_1135		250.192	14.7743	178.499	24.8537	81.5967	18.3509	106.477	17.4872
NWMN_RS06410	NWMN_1136		348.308	19.1626	166.495	17.0194	130.822	12.4182	79.9995	7.58535
NWMN_RS06415	NWMN_1137	recG	39.9828	3.25653	72.5049	10.448	47.9898	5.04705	41.6951	6.47194
NWMN_RS06420	NWMN_1138	fapR	318.028	6.22366	102.524	28.1982	95.5436	47.725	224.501	40.1114
NWMN_RS06425	NWMN_1139	plsX	334.721	19.0304	157.733	3.90901	141.658	5.46884	213.889	34.9377
NWMN_RS06430	NWMN_1140	fabD	396.088	27.716	185.379	24.3484	161.77	23.9141	237.681	30.7118
NWMN_RS06435	NWMN_1141	fabG	492.272	15.6281	366.332	22.5924	243.223	15.7055	415.139	92.5212
NWMN_RS06440			183.822	15.4233	1.42576	1.23963	0.0149494	0.025893	86.2368	64.3597
NWMN_RS06445	NWMN_1142	acpP	2745.65	274.831	1985.76	489.151	2076.6	266.142	667.701	170.864
NWMN_RS06450	NWMN_1143	rnc	51.1953	2.51646	34.6884	11.7146	27.3328	10.4466	73.8208	61.0035
NWMN_RS06455	NWMN_1144	smc	60.8107	1.52872	52.7141	2.90979	33.4592	3.89988	27.9474	8.04254
NWMN_RS06460	NWMN_1145	ftsY	87.4564	6.54994	74.9199	18.971	48.4844	10.9689	79.1642	21.6524
NWMN_RS06465	NWMN_1146		93.5092	7.93865	61.6005	32.0728	28.3827	27.1146	40.6172	14.4699
NWMN_RS06470	NWMN_1147	ffh	201.103	12.3568	328.909	29.043	272.555	14.1507	117.395	26.2217
NWMN_RS06475	NWMN_1148	rpsP	1387.99	148.959	387.139	89.8246	720.315	181.426	275.133	117.092
NWMN_RS06480	NWMN_1149	rimM	104.651	4.3196	24.8271	9.62208	40.2008	20.7394	14.1722	2.88371
NWMN_RS06485	NWMN_1150	trmD	140.933	4.8289	62.4203	17.5228	46.234	10.7524	62.6438	22.4308
NWMN_RS06490	NWMN_1151	rplS	3129.6	235.414	5523.29	311.075	3424.71	852.124	918.8	173.649
NWMN_RS06500	NWMN_1152		25.2429	1.69549	44.2834	7.16252	31.8116	10.8066	19.799	8.60679
NWMN_RS06505	NWMN_1153	rbgA	52.8283	2.20824	53.5997	7.83018	39.7079	10.8393	24.794	2.86912
NWMN_RS06510	NWMN_1154	rnhB	53.306	2.8935	60.7088	22.7467	47.5774	18.53	29.9998	11.6804
NWMN_RS06515	NWMN_1155	sucC	203.038	11.6898	1379.48	136.429	626.373	147.861	553.501	74.7805
NWMN_RS06520	NWMN_1156	sucD	245.186	16.9025	2514.68	136.71	1134.3	118.559	773.805	161.952
NWMN_RS06525	NWMN_1157	lytN	5.77064	1.16262	24.0759	6.05152	17.8542	5.46732	12.9513	3.48301
NWMN_RS06530	NWMN_1158	fmhC	11.3716	0.684313	33.9135	21.0422	19.77	3.76299	6.53538	2.17301
NWMN_RS06535	NWMN_1159	dprA	13.954	2.21112	5.83317	6.32906	6.38741	11.0633	22.1614	10.2007
NWMN_RS06540	NWMN_1160	topA	250.071	16.3191	113.015	16.4192	103.83	12.0301	77.9237	22.6718
NWMN_RS06545	NWMN_1161	gid, trmFO	261.518	35.9186	128.551	13.6716	131.675	19.4541	66.2194	33.2329
NWMN_RS06550	NWMN_1162	xerC	68.5403	3.47233	105.199	17.2899	123.11	30.6243	172.085	7.28128
NWMN_RS06555	NWMN_1163	clpQ	89.4325	8.39833	260.721	54.5623	181.755	71.3332	274.283	35.463
NWMN_RS06560	NWMN_1164	hslU	133.376	16.8207	202.575	38.2692	215.734	22.9921	289.566	30.8339
NWMN_RS06565	NWMN_1165	codY	179.944	15.3869	348.921	19.9661	263.406	21.4076	398.071	34.4136
NWMN_RS06570			15.8063	2.05864	1.46226	1.27107	0.0187229	0.0324289	9.17367	2.32673
NWMN_RS06575	NWMN_1166	rpsB	1985.67	128.281	4493.39	360.1	2199.84	709.813	516.964	36.7688
NWMN_RS06580			628.885	60.5075	212.699	50.0695	113.945	86.6498	71.0886	85.4989
NWMN_RS06585	NWMN_1167	tsf	1539.32	165.327	1682.79	122.617	1353.76	61.239	781.92	57.8367
NWMN_RS06590	NWMN_1168	pyrH	573.248	16.4037	90.6372	45.4505	114.593	7.90488	204.669	21.9786
NWMN_RS06595	NWMN_1169	frr	744.577	59.7754	224.152	37.6396	202.88	40.7179	202.659	28.8511
NWMN_RS06600	NWMN_1170	uppS	187.192	4.54132	54.3538	15.4772	72.361	29.3387	81.3014	32.2611
NWMN_RS06605	NWMN_1171	cdsA	231.86	9.4575	46.6449	2.66835	56.8493	25.2992	131.694	9.09952
NWMN_RS06610	NWMN_1172		139.021	5.60703	79.9153	21.7752	84.2775	7.42829	73.9148	8.84425
NWMN_RS06615	NWMN_1173	proS	240.249	17.9254	174.441	41.6653	137.49	27.7767	90.2383	30.0806
NWMN_RS06625	NWMN_1175	rimP	198.526	10.3006	141.6	33.0701	125.65	35.608	66.0426	26.2921
NWMN_RS06630	NWMN_1176	nusA	237.311	12.7116	168.852	38.9631	176.367	25.8322	142.407	32.6583
NWMN_RS06635			207.645	16.7127	199.375	63.8651	103.733	50.4026	74.7686	27.299
NWMN_RS06640	NWMN_1177	rpl7AE	234.501	22.5532	198.933	71.3376	133.432	14.9889	99.1499	54.554
NWMN_RS06645	NWMN_1178	infB	355.135	23.1075	250.431	10.7706	277.299	58.4988	183.465	34.7615
NWMN_RS06650	NWMN_1179	rbfA	441.002	15.8874	316.524	38.5742	235.272	33.9246	189.335	35.5608
NWMN_RS06655	NWMN_1180	truB	68.9849	1.75613	40.4617	9.92944	29.8083	14.281	46.3646	29.7118
NWMN_RS06660	NWMN_1181	ribC	98.6118	5.09189	171.551	28.0804	102.84	39.0916	79.8831	33.5204
NWMN_RS06665	NWMN_1182	rpsO	3375.72	424.438	2949.29	452.137	2191.79	225.494	1339.85	343.918
NWMN_RS06670	NWMN_1183	pnpA	254.452	21.9184	132.867	11.3582	183.746	40.2602	164.282	58.265
NWMN_RS06675	NWMN_1184	rnj	232.122	10.5036	574.715	40.7548	350.377	13.6183	334.935	20.5016
NWMN_RS06680	NWMN_1185	ftsK	130.777	7.77817	84.3029	15.6102	87.6257	16.2268	109.983	35.2457
NWMN_RS06685	NWMN_1186		112.712	7.67232	40.5206	11.78	59.5735	27.7784	44.1393	14.1697
NWMN_RS06690	NWMN_1187		92.8983	10.344	25.2788	14.741	30.1263	12.8294	28.3401	12.8653
NWMN_RS06695	NWMN_1188		109.337	8.24603	39.7294	5.21949	28.0561	9.86203	37.2879	11.7772
NWMN_RS06700	NWMN_1189		137.433	18.9819	35.6571	7.90951	41.5663	21.7253	68.2717	9.38376
NWMN_RS06705	NWMN_1190		165.816	10.199	81.908	9.65689	80.6695	24.3047	114.84	27.4643
NWMN_RS06710	NWMN_1191		158.903	14.0156	99.4303	39.7644	74.4642	30.8909	71.5569	55.7789
NWMN_RS06715	NWMN_1192	pgsA	139.328	8.66547	95.6757	24.2796	96.9004	51.7916	92.3252	32.1036
NWMN_RS06720	NWMN_1193	cinA	46.672	2.73585	88.304	6.10389	24.3557	12.1675	22.1414	6.98412
NWMN_RS06725	NWMN_1194	recA	280.491	177.108	1173.83	90.7448	672.697	64.8423	160.547	49.2975
NWMN_RS06730	NWMN_1195	cvfA, rny	514.123	22.8512	2065.37	248.698	787.324	91.2108	605.838	136.818
NWMN_RS06735	NWMN_1196		169.055	36.9756	263.372	101.131	350.601	177.655	39.081	30.1046
NWMN_RS06740	NWMN_1197		120.706	17.762	57.1227	16.6832	89.6722	14.7345	55.9995	21.9736
NWMN_RS06745	NWMN_1198	porA	91.7755	21.7632	240.342	23.6395	110.652	20.8871	39.4518	5.91676
NWMN_RS06750	NWMN_1199	porB	117.113	16.6858	450.515	0	280.087	17.7255	71.9659	9.6894
NWMN_RS06755	NWMN_1200		32.3791	4.97153	10.1953	13.8093	7.87522	13.591	7.29957	4.27782
NWMN_RS06760	NWMN_1201	miaB	132.819	7.72232	129.831	9.72578	102.754	20.5413	78.2705	9.90586
NWMN_RS06765	NWMN_1202		176.408	14.9608	121.856	37.9214	71.5238	38.2107	198.037	22.5913
NWMN_RS06770	NWMN_1203		133.071	9.11787	156.48	20.0627	191.076	79.9673	112.19	6.87267
NWMN_RS06775	NWMN_1204	mutS	49.0443	2.20731	43.4095	5.94161	40.0085	3.59923	46.2481	7.29405
NWMN_RS06780	NWMN_1205	mutL	61.4153	3.16051	45.1224	8.62234	33.6659	6.57937	34.9996	5.24977
NWMN_RS06785	NWMN_1206	glpP	67.671	3.40637	24.2707	20.8725	38.8403	27.3758	42.4479	19.4983
NWMN_RS06790	NWMN_1207	glpF	38.7278	2.57061	116.945	26.5952	129.386	37.802	590.768	21.8528
NWMN_RS06795	NWMN_1208	glpK	66.3362	7.14185	109.146	7.37402	78.0337	15.7165	170.388	47.6411
NWMN_RS06800	NWMN_1209	glpD	288.205	53.7448	171.34	13.9968	189.026	54.8539	521.097	55.5095
NWMN_RS06805	NWMN_1210		38.6035	6.96491	33.2814	3.6016	25.6511	17.9946	23.0304	14.6505
NWMN_RS06810	NWMN_1211	miaA	42.2471	5.46656	45.1974	4.76628	33.3808	13.1473	18.5157	5.63809
NWMN_RS06815	NWMN_1212	hfq	56.1496	7.88257	43.3446	24.1358	31.2769	17.9601	14.433	1.3864
NWMN_RS06820	NWMN_1213	bsaA	159.808	25.1361	223.399	70.7746	195.097	8.8483	66.7793	34.9584
NWMN_RS06825	NWMN_1214	hflX	43.8976	2.63977	43.7943	15.1727	33.4524	11.0083	16.8845	3.71883
NWMN_RS06830	NWMN_1215		58.7844	2.30612	77.3969	15.0283	43.1103	26.9921	20.7181	3.31489
NWMN_RS06835	NWMN_1216	glnR	686.221	131.843	258.474	13.3234	237.512	9.17459	160.562	46.0373
NWMN_RS06840	NWMN_1217	glnA	786.725	108.399	462.005	67.1405	361.829	49.1086	245.039	44.5115
NWMN_RS06845			21.2322	1.80594	43.4107	19.6392	6.28841	10.839	8.65684	5.07972
NWMN_RS06850			1.57962	0.558438	1.50803	1.31077	0.0221987	0.0384493	9.8529	11.2622
NWMN_RS06855	NWMN_1219		14.1693	4.2302	1.51984	1.32127	0.023189	0.0401646	8.02257	1.95916
NWMN_RS06860			10.1886	4.93772	1.53552	1.33531	0.0249398	0.043197	7.73767	6.49615
NWMN_RS06865	NWMN_1220		14.9597	4.21618	9.08252	11.7249	0.0257872	0.0446647	10.7002	2.22207
NWMN_RS06870			6.277	1.87964	1.5741	1.37004	0.0281402	0.0487403	10.8316	4.26262
NWMN_RS06875			13.6376	4.72333	1.58573	1.37982	0.0288929	0.050044	11.1533	11.7481
NWMN_RS06880	NWMN_1222		13.7486	4.16342	11.687	18.3297	5.47762	9.39629	8.93887	2.698
NWMN_RS06885	NWMN_1223		8.33237	1.82613	1.61453	1.4039	10.3687	8.88741	7.41878	1.77227
NWMN_RS06890	NWMN_1224		44.2366	12.7232	1.62155	1.41027	14.7584	13.7693	10.9558	8.5626
NWMN_RS06895			1.79072	1.87101	1.63838	1.42557	0.0917167	0.158858	6.52864	1.5298
NWMN_RS06900			1.47764	0.150802	1.65065	1.43647	0.106446	0.184371	3.20364	5.54887
NWMN_RS06905			7.94526	2.88587	1.67	1.4522	0.124162	0.215055	5.80584	2.84099
NWMN_RS06910			54.6061	22.1905	49.8484	41.2866	29.7936	31.6254	9.82529	5.05866
NWMN_RS06920	NWMN_1225		66.1166	25.145	1.69054	1.46827	0.168904	0.292551	13.2442	2.86264
NWMN_RS06925			64.1877	21.076	8.96793	11.1058	9.73937	16.8691	18.8118	12.9971
NWMN_RS06930	NWMN_1226		41.4142	16.4713	12.0497	16.3775	17.2355	15.1368	8.7542	2.07419
NWMN_RS06935	NWMN_1227		25.2532	11.1766	1.74134	1.5113	16.2385	14.9497	6.16045	1.53601
NWMN_RS06940	NWMN_1228		15.1938	2.36733	30.8878	9.80904	21.0289	5.5645	12.2427	0.794987
NWMN_RS06945			74.6573	35.1651	93.6438	41.7454	135.858	33.3474	11.4719	5.97944
NWMN_RS06950	NWMN_1230		50.155	13.0655	55.6701	4.74013	40.9478	1.41223	26.2962	11.8109
NWMN_RS06955	NWMN_1231		5.04848	1.06362	6.96867	9.78421	8.69522	7.74196	6.53704	0.783061
NWMN_RS06960	NWMN_1232		7.42285	0.541939	1.77105	1.53456	5.21326	9.02963	6.70654	0.699389
NWMN_RS06965	NWMN_1233	tcs7S	24.707	4.88926	34.6518	7.5623	28.5514	16.3692	11.6804	3.31466
NWMN_RS06970	NWMN_1234	tcs7R	30.056	1.81419	65.8307	24.3831	48.8924	9.29207	47.7069	14.6744
NWMN_RS06975	NWMN_1235		49.5923	17.6434	68.906	9.89061	87.4514	18.0304	10.2827	4.81024
NWMN_RS06980	NWMN_1236	nuc	63.7899	11.2742	24.2519	2.24	16.4259	14.3267	18.6758	9.80994
NWMN_RS06985	NWMN_1237		104.921	18.4027	89.1417	32.2545	96.3506	9.37664	320.77	94.9348
NWMN_RS06990	NWMN_1238		35.8378	5.60831	65.4437	21.1363	48.7328	14.8294	247.035	22.1498
NWMN_RS06995	NWMN_1239	thrA	6.8124	0.704021	30.5438	8.33662	43.7071	17.6277	21.8811	7.09809
NWMN_RS07000	NWMN_1240	dhoM	23.052	4.02294	78.7337	11.6289	148.249	42.4477	137.097	48.595
NWMN_RS07005	NWMN_1241	thrC	28.2561	4.00481	89.5039	15.237	262.614	43.786	161.724	32.9033
NWMN_RS07010	NWMN_1242	thrB	25.7021	4.63618	46.4747	18.4155	130.003	36.6824	95.5192	45.8544
NWMN_RS07015	NWMN_1243		189.428	26.1847	126.296	19.8335	171.659	11.8117	184.436	28.2635
NWMN_RS07020	NWMN_1244		178.204	33.9229	76.0789	20.0492	65.9064	2.15581	36.8035	29.6468
NWMN_RS07025			37.2397	10.135	12.6174	17.2232	0.178734	0.309576	2.63294	3.25677
NWMN_RS07030	NWMN_1245	pheP	160.098	38.9052	49.8414	11.5129	69.177	10.6916	72.2004	5.532
NWMN_RS07035	NWMN_1246	katA	147.883	19.4872	854.91	70.4027	844.292	277.894	359.343	145.058
NWMN_RS07040	NWMN_1247	rpmG, rpmG2	408.508	93.7247	574.587	52.0491	492.781	149.768	383.058	193.45
NWMN_RS07045	NWMN_1248	rpsN	67.4691	22.0505	154.133	113.811	180.802	49.5315	247.631	162.609
NWMN_RS07050	NWMN_1249	guaC	75.8336	27.6301	13.7319	9.7162	36.5029	27.6528	27.0337	19.9031
NWMN_RS07055			87.2502	35.4185	1.80813	1.56676	0.185901	0.32199	28.1915	37.2428
NWMN_RS07060	NWMN_1250		148.116	37.8183	102.977	13.6146	60.5713	9.27741	38.2047	25.4078
NWMN_RS07065	NWMN_1251	lexA	89.3345	57.8692	632.355	42.6819	565.58	115.32	183.836	52.9924
NWMN_RS07070	NWMN_1252		30.3816	64.7063	443.023	102.636	291.907	52.1487	5.65276	1.38973
NWMN_RS07075	NWMN_1253		90.9343	4.99762	149.616	73.1214	94.1229	20.4549	11.4558	4.79782
NWMN_RS07080	NWMN_1254	tkt	477.543	44.5579	1426.55	34.963	1009.57	206.039	810.912	165.826
NWMN_RS07085	NWMN_1255		791.903	75.6411	237.336	25.4001	214.141	85.392	62.3925	24.4165
NWMN_RS07090			15.383	4.64536	1.82957	1.5816	0.187215	0.324265	2.43407	3.73085
NWMN_RS07095	NWMN_1256		115.811	16.9268	88.4091	25.996	115.458	22.8239	18.296	4.4574
NWMN_RS07100	NWMN_1257	sbcD	26.0801	2.99128	48.6875	9.70403	31.4573	4.04036	11.5509	2.75737
NWMN_RS07105	NWMN_1258	sbcC	34.7728	3.46893	102.586	10.0629	62.44	15.6447	11.41	2.02541
NWMN_RS07110	NWMN_1260	mscL	747.818	133.734	95.8644	10.637	88.3474	33.321	186.151	52.2297
NWMN_RS07115	NWMN_1261	opuD	465.914	33.4865	143.194	15.0699	189.044	26.8175	149.392	43.1374
NWMN_RS07120	NWMN_1263	citB	177.362	80.5078	653.927	37.0049	613.503	82.6623	133.841	25.3595
NWMN_RS07125	NWMN_1264		76.4964	6.1138	188.812	47.4108	111.775	27.8982	56.4425	9.44611
NWMN_RS07130	NWMN_1265		164.228	5.02025	131.53	50.5047	112.317	9.26545	43.731	30.0685
NWMN_RS07135	NWMN_1266	plsY	249.276	45.7383	93.9247	36.6698	180.504	36.9635	75.2841	15.507
NWMN_RS07140	NWMN_1267	parE	124.717	9.73658	92.1498	12.2323	70.3452	5.72595	32.3624	4.4993
NWMN_RS07145	NWMN_1268	parC	156.642	10.4534	124.047	19.5027	105.302	10.5029	34.4831	4.50691
NWMN_RS07150			0	0	1.84122	1.59155	0.19095	0.330735	0	0
NWMN_RS07155	NWMN_1269	alsT	299.527	32.4131	82.0006	13.238	81.5764	34.2744	65.7405	14.9815
NWMN_RS07160	NWMN_1270	glcT	69.4264	21.527	53.6451	9.11267	23.0968	14.7807	14.5903	3.35659
NWMN_RS07165			88.558	29.2975	1.8516	1.59895	0.192537	0.333483	35.6664	29.6703
NWMN_RS07170	NWMN_1271		206.774	49.3378	147.612	31.7871	119.591	40.432	51.1082	13.7301
NWMN_RS07175	NWMN_1272	fmtC, mprF	179.541	31.5189	134.571	6.66429	130.873	25.1672	115.741	38.7013
NWMN_RS07180	NWMN_1273	msrA	73.9156	5.94016	217.619	15.0288	99.7555	24.5961	89.3197	45.398
NWMN_RS07185	NWMN_1274	msrR, lcpA	151.711	12.5628	146.325	37.145	127.007	22.8961	84.2166	6.86922
NWMN_RS07190	NWMN_1275		243.301	47.9472	207.821	88.0186	140.755	63.569	140.867	78.0572
NWMN_RS07195	NWMN_1276		17.1033	44.5408	355.269	65.8755	182.714	48.1346	17.3402	2.52257
NWMN_RS07200	NWMN_1277	tyrA	46.303	32.9015	32.7659	10.5294	28.5205	11.4893	31.9447	3.91724
NWMN_RS07205	NWMN_1278		55.5619	41.7194	538.391	108.393	331.08	127.317	77.432	24.3227
NWMN_RS07210	NWMN_1279	trpE	18.7853	2.83442	6.73142	6.82567	15.6026	4.03662	8.26227	1.66083
NWMN_RS07215	NWMN_1280	trpG	18.4377	1.16887	1.87549	1.61842	5.39487	8.82429	18.1687	8.96183
NWMN_RS07220	NWMN_1281	trpD	13.5253	0.725451	12.161	9.10325	10.4602	9.13128	15.6918	2.91349
NWMN_RS07225	NWMN_1282	trpC	7.04471	0.340885	15.8237	11.879	6.78313	11.1759	22.9729	8.00022
NWMN_RS07230	NWMN_1283	trpF	7.43601	0.779813	10.6243	16.0665	13.4756	2.27377	17.3816	3.27502
NWMN_RS07235	NWMN_1284	trpB	10.2789	0.9642	21.1493	16.2213	17.928	4.07195	35.4772	10.0022
NWMN_RS07240	NWMN_1285	trpA	20.0253	1.20904	28.9033	12.4361	48.2229	20.6152	10.4795	0.909907
NWMN_RS07245	NWMN_1286	femA	229.522	15.9877	152.845	34.4116	99.6089	32.8238	179.357	28.9419
NWMN_RS07250	NWMN_1287	femB	269.318	23.1965	238.986	37.3656	159.638	38.8763	185.651	20.5218
NWMN_RS07255	NWMN_1288		49.9846	7.88882	28.3761	7.09307	44.7006	8.6251	27.7149	8.33763
NWMN_RS07260	NWMN_1289		74.8463	10.5919	158.218	16.5576	123.307	77.8723	32.2298	2.14671
NWMN_RS07265	NWMN_1290	opp-2F	41.5918	5.21922	57.9837	3.93769	42.7977	15.4861	15.9903	6.26334
NWMN_RS07270	NWMN_1291	opp-2D	27.4098	1.65261	44.5284	30.6644	21.2404	14.4942	10.917	3.62957
NWMN_RS07275	NWMN_1292	opp-2C	26.6918	3.1962	29.0424	3.85476	17.6174	3.98044	27.0866	12.7158
NWMN_RS07280	NWMN_1293	opp-2B	25.2041	2.94027	42.7704	9.78635	23.7573	11.1579	10.3309	1.23972
NWMN_RS07285			26.5728	1.68885	121.812	26.9225	38.0339	9.69586	5.94874	5.93647
NWMN_RS07290	NWMN_1294		59.1976	17.2264	97.1185	9.68495	59.0428	14.4837	7.52105	3.75474
NWMN_RS07295	NWMN_1295	pepF	86.4239	11.0942	51.245	9.42521	53.8895	4.5134	58.0998	3.79039
NWMN_RS07300	NWMN_1296	phoU	10.5318	0.435145	73.2303	17.5052	43.0555	20.9148	6.92227	1.0782
NWMN_RS07305	NWMN_1297	pstB	7.44778	0.957706	65.1579	17.2649	31.2189	20.2441	11.4744	0.108309
NWMN_RS07310	NWMN_1298	pstA	5.94015	1.29197	64.9223	23.0288	39.2391	20.1697	21.0307	3.43732
NWMN_RS07315	NWMN_1299	pstC	5.32491	1.20709	57.7774	28.9894	23.4732	24.9952	12.0807	1.64294
NWMN_RS07320	NWMN_1300	pstS	3.24096	2.49093	92.0628	32.3426	84.2389	37.7933	16.5849	5.40882
NWMN_RS07335	NWMN_1302	cvfB	173.395	11.1982	250.302	52.2706	273.851	13.2713	246.324	52.7478
NWMN_RS07340	NWMN_1303		179.192	25.4847	104.871	31.9692	87.4971	17.7357	69.2384	9.03982
NWMN_RS07345	NWMN_1304	lysC	6.95766	0.583662	47.0011	12.506	31.2658	6.07725	23.5679	6.66534
NWMN_RS07350	NWMN_1305	asd	9.16794	1.82862	40.3829	6.24515	29.7591	7.65511	58.7851	23.8689
NWMN_RS07355	NWMN_1306	dapA	10.3499	0.932974	39.9745	5.19856	57.6508	35.9293	39.3362	11.5131
NWMN_RS07360	NWMN_1307	dapB	13.2184	0.845102	47.8997	14.5359	57.2716	21.7678	47.5077	26.7182
NWMN_RS07365	NWMN_1308	dapD, dapH	14.8387	2.10383	69.9093	25.8684	74.382	23.3073	35.8861	16.6638
NWMN_RS07370	NWMN_1309	hipO	15.7488	1.95912	21.5335	4.11403	30.7126	15.6961	31.5608	13.7591
NWMN_RS07375	NWMN_1310	alr2	18.2183	1.57351	26.1619	4.04096	30.7689	10.4318	17.5043	3.46657
NWMN_RS07380	NWMN_1311	lysA	46.2293	1.97947	107.969	21.5134	86.5244	39.5033	37.0502	7.94047
NWMN_RS07385	NWMN_1312	msaC	5.18795	2.26221	7.04383	7.22631	10.7861	9.65215	3.39954	0.772275
NWMN_RS07390	NWMN_1313	cspA, mscB	3545.69	511.601	584.845	129.153	1148.4	607.743	1556.7	357.613
NWMN_RS07395			147.496	43.5212	1.93374	1.65271	0.224192	0.388312	24.7874	27.4861
NWMN_RS07400	NWMN_1314	msaA	56.4996	13.1519	171.13	56.9471	57.815	25.0622	47.5402	12.4004
NWMN_RS07405	NWMN_1315	scyP	80.0634	7.36815	490.55	78.7546	194.449	61.4039	51.5603	9.24522
NWMN_RS07410	NWMN_1316		96.2305	6.10537	244.956	45.5582	127.603	40.2165	86.6974	32.5957
NWMN_RS07415	NWMN_1317		107.571	6.52936	363.795	15.9745	261.45	25.8717	65.4898	43.8445
NWMN_RS07430	NWMN_1320	braB	96.9424	9.37853	31.0652	6.94515	42.3705	10.2664	13.4843	5.0809
NWMN_RS07435	NWMN_1321		58.4898	8.52496	29.5046	3.74354	33.6358	6.93723	13.3407	1.97428
NWMN_RS07440	NWMN_1322		59.3542	5.59931	1.95697	1.66271	25.9941	10.5125	21.1576	4.78172
NWMN_RS07445	NWMN_1323		142.679	25.4773	344.018	64.5796	205.997	17.1018	160.085	106.457
NWMN_RS07450	NWMN_1324		156.959	23.351	464.147	46.0329	437.098	60.9267	294.559	48.8583
NWMN_RS07455	NWMN_1325	odhB	44.2232	2.41441	1345.68	37.8425	639.498	131.711	704.25	226.625
NWMN_RS07460	NWMN_1326	sucA, odhA	33.5043	2.59772	810.612	79.9176	400.953	65.7248	629.312	147.079
NWMN_RS07465	NWMN_1327	arlS	90.9587	17.2105	80.2578	15.7027	50.5187	2.81589	37.0668	26.8721
NWMN_RS07470	NWMN_1328	arlR	115.357	26.2407	68.1004	5.09809	48.3836	22.5955	62.7094	45.7222
NWMN_RS07475			9.87567	3.38752	1.98148	1.6826	0.241976	0.419115	0.836105	1.08611
NWMN_RS07480			6.77601	0.640381	1.99152	1.68988	0.246826	0.427515	5.2717	1.9662
NWMN_RS07485	NWMN_1329		133.161	13.6938	86.3117	11.6373	41.5038	23.118	64.3512	40.1959
NWMN_RS07490	NWMN_1330	murG	120.526	14.9645	63.3303	13.3769	29.8642	6.21371	42.8508	13.6776
NWMN_RS07495	NWMN_1331		84.2707	14.048	30.7833	31.4586	32.3726	9.4662	12.9231	4.90564
NWMN_RS07500	NWMN_1332	ctpA	70.6686	11.9554	54.0814	9.57108	47.5786	16.9162	30.1485	4.17258
NWMN_RS07510			235.558	35.1195	575.766	54.7135	468.887	129.15	269.493	75.0309
NWMN_RS07515	NWMN_1333	crr	288.388	26.462	1093.4	114.284	838.909	139.719	395.436	9.40325
NWMN_RS07520	NWMN_1334	msrB	222.227	19.621	833.292	88.6534	619.602	118.977	287.358	77.6267
NWMN_RS07525	NWMN_1335	msrA	249.324	14.043	777.63	78.5829	424.897	117.581	278.576	40.3905
NWMN_RS07530	NWMN_1336		120.201	4.09504	56.3107	11.0811	48.7346	20.7675	146.913	53.0088
NWMN_RS07535	NWMN_1337	dfrA	131.612	5.10369	66.0463	7.46227	55.1538	23.3773	164.507	16.8468
NWMN_RS07540	NWMN_1338	thyA	67.6664	5.58463	29.3463	12.811	27.0742	13.3758	36.7846	36.307
NWMN_RS07545	NWMN_1339	cvfC4	131.222	7.4122	308.068	79.9171	200.835	24.6303	64.7976	39.7927
NWMN_RS07550	NWMN_1340	cvfC3	133.253	7.33033	306.079	69.6484	194.792	24.1293	50.1319	34.5998
NWMN_RS07555	NWMN_1341	cvfC2	131.178	10.1966	113.313	40.8593	33.4265	8.30364	57.9669	18.1008
NWMN_RS07560			114.006	13.4125	126.113	80.3903	45.969	18.421	65.1855	40.1774
NWMN_RS07565	NWMN_1342		44.8303	0.382024	31.7794	10.952	36.3138	15.0457	10.7953	3.57031
NWMN_RS07580	NWMN_1343		29.983	4.36584	14.5422	22.5356	12.6175	10.9311	5.52461	1.85098
NWMN_RS07590	NWMN_1345	ebh	7.37252	0.339	25.5919	0.988794	26.3714	5.80762	14.6966	1.68534
NWMN_RS07595	NWMN_1346	norB	15.2863	2.67641	17.8608	0.838849	92.8583	68.1449	485.321	184.592
NWMN_RS07600	NWMN_1347		17.9395	3.65729	15.4696	11.0962	177.92	149.719	1986.85	273.097
NWMN_RS07605	NWMN_1348	ilvA	16.8433	3.91715	19.2403	4.68655	221.97	141.859	2252.11	169.395
NWMN_RS07610	NWMN_1349	ald	14.7243	3.44293	27.749	1.79253	235.608	187.458	1690.11	221.818
NWMN_RS07615	NWMN_1350		72.2476	7.71931	54.5215	6.82705	47.5735	15.3177	48.5045	31.1543
NWMN_RS07620	NWMN_1351		54.5769	5.70218	50.0592	6.20111	41.9897	4.20404	14.5402	2.913
NWMN_RS07625	NWMN_1352		95.2559	27.9084	19.4894	2.14658	21.9051	9.76097	20.0259	3.1381
NWMN_RS07635	NWMN_1353		69.3246	6.9296	26.1193	22.8658	18.1346	19.2908	41.4986	15.3212
NWMN_RS07640	NWMN_1354		76.5429	5.04972	38.295	9.30205	31.4571	8.48302	45.3869	16.3716
NWMN_RS07645	NWMN_1356		334.082	43.8484	485.301	103.209	222.92	75.8055	435.129	52.0393
NWMN_RS07650	NWMN_1357		164.585	8.31024	447.004	37.1487	185.511	58.5771	302.691	66.0235
NWMN_RS07655	NWMN_1358		89.2778	16.139	278.601	61.1394	125.25	15.7756	130.672	51.3799
NWMN_RS07660	NWMN_1359		0.252411	0.87882	2.02523	1.709	0.256692	0.441662	5.65232	2.6098
NWMN_RS07665	NWMN_1360	recU	285.712	61.0359	821.859	167.564	370.445	76.8115	217.632	60.0106
NWMN_RS07670	NWMN_1361	pbp2	523.502	72.5762	2024.04	79.2824	1593.8	555.823	482.498	69.9049
NWMN_RS07675	NWMN_1362		62.0275	4.45795	142.997	44.6733	59.5445	19.2177	11.4561	0.66345
NWMN_RS07680	NWMN_1363	nth	77.718	0.778869	230.594	59.518	103.072	25.2276	59.7086	18.599
NWMN_RS07685	NWMN_1364	dnaD	61.522	3.41305	187.845	21.2169	69.9982	9.76807	30.2955	13.0311
NWMN_RS07690	NWMN_1365	asnC	301.522	5.73287	149.654	12.0307	173.409	33.8635	151.256	44.3287
NWMN_RS07695	NWMN_1366	dinG	70.7377	5.47965	90.4851	7.09026	70.8597	19.0069	19.1882	5.09773
NWMN_RS07700	NWMN_1367	birA	45.2356	1.03797	60.3989	7.68263	38.4983	11.827	37.9546	18.1738
NWMN_RS07705	NWMN_1368	cca	43.4859	2.96099	63.8689	12.5731	43.6066	15.1414	50.6781	11.2309
NWMN_RS07710	NWMN_1369	BshA	45.249	1.56932	71.3926	10.2865	36.5192	9.05672	56.4063	4.29199
NWMN_RS07715	NWMN_1370		40.6803	3.23589	58.7491	15.5072	15.9731	16.4877	18.75	2.94867
NWMN_RS07720	NWMN_1371		1159.73	91.4825	4239.83	578.54	2318.81	313.533	1223.06	115.145
NWMN_RS07725	NWMN_1372		64.1391	3.81749	26.3407	20.0988	33.6475	24.0705	11.7695	7.38759
NWMN_RS07730	NWMN_1373		61.9326	10.8504	45.1186	29.1791	34.4989	18.4466	13.1001	3.77938
NWMN_RS07735	NWMN_1374		92.4585	17.0898	74.8335	9.72097	81.3998	11.4142	27.1968	8.04521
NWMN_RS07740	NWMN_1375	aroA	66.8469	3.5628	44.8017	8.36232	35.6523	9.13957	57.7451	13.9114
NWMN_RS07745	NWMN_1376	aroB	45.7042	2.53452	22.117	2.72015	24.7433	10.5197	43.4386	23.201
NWMN_RS07750	NWMN_1377	aroC	42.7119	3.08994	27.0566	5.64009	24.3797	4.0756	31.7377	9.5885
NWMN_RS07755			1.35306	0.591938	2.04816	1.72964	0.272532	0.468706	5.33528	2.87222
NWMN_RS07760	NWMN_1378	ndk	101.964	2.90734	179.543	38.2095	142.05	14.7739	118.137	40.1278
NWMN_RS07765	NWMN_1379	gerCC	154.901	4.00429	68.3466	17.433	61.017	6.18175	135.16	29.2649
NWMN_RS07770	NWMN_1380	ubiE, menG	134.773	7.01801	61.1222	10.2821	65.822	23.6101	137.177	17.1018
NWMN_RS07775	NWMN_1381		97.321	23.8853	65.3416	7.41572	20.2041	7.09306	60.3024	33.9845
NWMN_RS07780			13.9716	0.246541	7.81414	8.23917	0.290373	0.495344	4.49428	1.13256
NWMN_RS07785	NWMN_1382	hu	21895.6	9743.39	2479.68	539.013	4983.79	1140	4035.97	1021.16
NWMN_RS07790	NWMN_1383	gpsA	195.199	9.84998	127.897	10.0052	169.832	20.2807	139.848	51.7441
NWMN_RS07795	NWMN_1384	engA, der	178.292	14.104	98.3031	32.536	124.645	29.3319	162.046	51.8356
NWMN_RS07800	NWMN_1385	rpsA	272.312	53.3392	1114.06	94.5607	868.579	194.52	914.724	200.803
NWMN_RS07805			0.66104	0.118774	2.06314	1.7389	0.297777	0.508169	6.97391	4.21275
NWMN_RS07810			0.28988	0.112877	2.07898	1.74737	0.311848	0.530696	5.19785	5.53482
NWMN_RS07815			36.1784	1.34807	18.8803	30.1041	0.320539	0.545211	10.1296	2.99682
NWMN_RS07820	NWMN_1386	cmk	130.695	5.89848	124.266	35.5325	98.0534	18.6686	47.076	13.647
NWMN_RS07825	NWMN_1387	ansA	63.376	4.80694	57.3145	13.3946	61.1725	29.6062	12.4253	1.87474
NWMN_RS07830	NWMN_1388	ypdA	58.8048	17.2878	148.185	13.4461	87.2421	6.8629	64.8317	24.5423
NWMN_RS07835			2.34665	0.315717	2.10288	1.75985	0.348888	0.593545	6.47544	2.26733
NWMN_RS07840	NWMN_1389	ebpS	209.152	15.2095	533.401	72.7905	298.292	31.7875	343.401	55.9858
NWMN_RS07845	NWMN_1390	recQ	30.1841	1.60928	46.9035	8.85339	33.4908	2.92499	46.7097	10.3968
NWMN_RS07850	NWMN_1391		32.7211	1.52608	27.4056	7.82178	21.3703	12.9409	18.3593	10.7857
NWMN_RS07855	NWMN_1392	fer	154.39	46.5013	1388.96	177.138	473.185	169.83	71.0828	54.2281
NWMN_RS07860	NWMN_1393		142.144	29.2961	1868.08	56.6029	810.789	365.147	55.4362	20.1579
NWMN_RS07865			22.3223	2.23614	32.156	28.1659	17.1146	28.7328	6.8117	5.56313
NWMN_RS07870	NWMN_1394		16.4439	1.01819	31.2635	7.90146	17.6544	4.43834	15.4643	7.85907
NWMN_RS07875			10.0946	1.89233	16.8548	26.3553	0.374749	0.625173	14.4231	8.84813
NWMN_RS07880	NWMN_1395		9.79432	1.04921	2.13248	1.77543	9.9601	8.0623	11.7423	2.24155
NWMN_RS07885	NWMN_1396		9.54205	0.826734	7.94176	8.26777	11.2508	8.78522	12.7514	3.01755
NWMN_RS07890	NWMN_1397		13.6165	1.85826	29.3342	5.98836	20.5503	5.44274	34.4429	15.8222
NWMN_RS07895	NWMN_1398		10.2701	2.56915	15.0308	10.2057	13.0132	10.8718	35.4669	15.0211
NWMN_RS07900	NWMN_1399	srrB	54.3959	4.94691	68.9526	19.433	81.2849	11.2963	104.954	21.6564
NWMN_RS07905	NWMN_1400	srrA	118.242	3.61326	311.596	51.7138	291.516	56.8484	673.061	58.2897
NWMN_RS07910	NWMN_1401	rluB	78.47	3.77788	124.641	19.1181	92.9867	32.4871	69.7599	24.6753
NWMN_RS07915	NWMN_1402	scpB	66.3913	0.25343	84.909	10.0681	69.9586	5.98105	50.203	18.4311
NWMN_RS07920	NWMN_1403	scpA	55.2665	2.29141	94.5726	20.8969	72.2862	11.8515	32.4069	14.5278
NWMN_RS07925	NWMN_1404		21.8425	1.35695	12.8143	8.93103	28.3408	5.49217	7.7957	1.40331
NWMN_RS07930	NWMN_1405	xerD	72.7227	7.85328	112.538	14.8578	111.002	19.9258	52.2756	21.3148
NWMN_RS07935	NWMN_1406	fur	227.069	13.8934	342.016	22.6144	325.52	56.5577	204.049	63.1137
NWMN_RS07940	NWMN_1407		34.6476	4.1465	27.4072	16.6501	32.8337	9.31815	17.1868	5.54354
NWMN_RS07945	NWMN_1408		71.1471	5.53493	85.4615	22.4929	73.6997	33.8081	79.7289	30.9938
NWMN_RS07950			31.7039	2.87175	10.456	15.2119	9.6236	15.6396	80.084	7.11277
NWMN_RS07955	NWMN_1409		34.6451	2.48767	7.52073	7.19599	20.7955	4.66242	36.1599	21.1255
NWMN_RS07960	NWMN_1410	proC	54.5604	10.5704	108.391	25.2793	71.2859	16.0196	20.6121	9.8935
NWMN_RS07965	NWMN_1411	rnz	68.9756	6.1962	42.5589	4.56965	43.3988	10.8106	40.6934	16.0188
NWMN_RS07970	NWMN_1412	zwf	209.029	16.2072	604.846	41.2007	412.967	151.666	227.811	76.8009
NWMN_RS07975	NWMN_1413		147.582	13.1295	320.095	4.20909	202.518	40.8973	80.8744	34.6238
NWMN_RS07980	NWMN_1414	malA	9.94625	0.577632	63.1059	3.27051	43.714	7.45717	63.7652	17.4221
NWMN_RS07985	NWMN_1415	malR	4.38707	0.329668	33.7747	4.75173	31.9874	16.1311	11.6458	1.41181
NWMN_RS07990			19.1393	2.26351	47.8827	32.1011	32.0495	19.1493	28.5925	19.7857
NWMN_RS07995	NWMN_1416		117.915	23.0611	179.438	9.90064	151.581	68.7687	107.52	15.2051
NWMN_RS08000	NWMN_1417	gnd	488.981	34.7739	1012.34	60.8428	519.156	39.0834	331.096	7.36894
NWMN_RS08005	NWMN_1418		35.3136	1.81862	217.253	31.2152	95.3098	14.9503	57.3449	16.51
NWMN_RS08010			87.337	38.0562	14.3993	19.0217	10.1422	17.5323	10.3305	5.31673
NWMN_RS08015	NWMN_1419		115.579	25.2334	125.691	26.9534	74.9988	12.2234	72.7732	10.4033
NWMN_RS08020	NWMN_1420		123.571	19.4382	149.325	31.5393	114.745	47.4163	113.45	28.8654
NWMN_RS08025	NWMN_1421	bmfBB	225.753	8.90071	401.093	31.2764	242.526	52.6479	226.342	28.1683
NWMN_RS08030	NWMN_1422	bfmBAB	166.739	3.90742	287.359	15.2548	256.66	24.2346	152.719	28.0823
NWMN_RS08035	NWMN_1423	bfmBAA	171.134	3.83901	314.784	33.4929	220.535	46.0533	195.336	13.6137
NWMN_RS08040	NWMN_1424	lpdA	137.672	3.49866	172.806	36.3914	102.076	39.4056	174.43	20.7034
NWMN_RS08045	NWMN_1425	recN	122.095	7.21896	107.395	17.7002	85.5265	4.00351	120.58	48.293
NWMN_RS08050	NWMN_1426	ahrC	103.078	7.87017	47.6415	3.39059	50.1234	3.27938	111.799	20.206
NWMN_RS08055	NWMN_1427	ispA	223.716	32.8414	113.393	21.2026	98.6249	27.7858	124.011	20.09
NWMN_RS08060			223.756	19.5173	74.8201	29.6143	108.556	89.3118	60.0162	11.7196
NWMN_RS08065	NWMN_1428	xseA	208.907	5.96502	115.117	36.5388	110.431	24.9381	61.6358	13.9733
NWMN_RS08070	NWMN_1429	nusB	194.918	11.0473	98.8949	24.9915	90.3308	13.9819	74.11	20.3478
NWMN_RS08075	NWMN_1430		202.433	5.74543	83.6781	27.2462	62.9521	51.4618	100.007	64.8095
NWMN_RS08080	NWMN_1431	accC	208.761	12.8313	107.514	21.5484	118.853	23.0755	103.503	20.6499
NWMN_RS08085	NWMN_1432	accB	230.339	2.86261	171.423	57.3876	128.672	35.5805	77.9654	18.8675
NWMN_RS08090	NWMN_1433	efp	815.717	67.3454	462.763	49.6679	600.112	231.257	389.935	29.7761
NWMN_RS08095	NWMN_1434		118.763	10.3926	95.3003	13.2466	65.5823	16.1786	119.037	24.423
NWMN_RS08100	NWMN_1435		100.418	21.0548	126.888	26.7528	91.3716	44.0481	81.6775	17.8785
NWMN_RS08105	NWMN_1436		67.376	14.6125	93.6753	62.0569	124.853	19.4351	50.8941	22.4522
NWMN_RS08110	NWMN_1437		73.0293	3.14839	213.624	15.5479	178.1	34.0809	90.4565	23.2498
NWMN_RS08115	NWMN_1438		314.3	6.45729	152.113	19.1179	200.83	71.8718	93.9846	8.54306
NWMN_RS08120	NWMN_1439	gcvPB	62.451	2.6572	292.422	90.99	183.5	12.3317	67.3421	33.1082
NWMN_RS08125	NWMN_1440	gcvPA	53.4949	4.14196	153.574	17.9122	99.738	29.7238	56.7906	29.6367
NWMN_RS08130	NWMN_1441	gcvT	40.7023	3.40811	168.188	44.729	72.8637	32.9693	40.2232	24.5819
NWMN_RS08135	NWMN_1442	aroK	39.5881	6.50463	186.31	67.9208	123.246	31.2404	47.1057	13.9825
NWMN_RS08140			16.9121	5.20139	2.33455	1.95727	0.422262	0.69592	1.34459	2.3289
NWMN_RS08145			5.38743	0.942533	2.40674	1.91109	0.431261	0.710208	5.65556	0.907438
NWMN_RS08150	NWMN_1444		5.76149	0.580199	2.43099	1.90401	8.0002	12.7834	5.36686	3.455
NWMN_RS08155	NWMN_1445		3.54114	1.05523	9.21341	9.81496	4.84887	7.30119	4.33284	2.06459
NWMN_RS08160	NWMN_1446		4.79888	1.15502	2.49782	1.92759	0.456037	0.748384	5.16162	0.14772
NWMN_RS08165	NWMN_1447		4.10545	0.884829	2.52733	1.91019	4.70454	7.02001	4.94235	1.69815
NWMN_RS08170	NWMN_1448		9.27353	0.102007	2.5634	1.88037	5.44585	8.19738	8.61003	2.36196
NWMN_RS08175	NWMN_1449		134.243	9.92234	72.8112	20.7118	104.448	57.2339	65.2336	40.891
NWMN_RS08180	NWMN_1450		126.544	6.01088	95.7268	3.77148	125.932	75.7684	120.335	37.4777
NWMN_RS08185	NWMN_1451	glcK	114.491	4.36903	69.9289	14.616	78.106	26.9917	179.84	50.7295
NWMN_RS08190			85.5276	8.30353	36.6089	29.6638	0.514879	0.837305	30.002	12.4335
NWMN_RS08195	NWMN_1452		63.9558	7.60876	34.245	6.21153	33.3954	3.51468	85.5908	32.6497
NWMN_RS08200	NWMN_1453		41.394	5.79568	47.1405	17.2021	43.092	23.6937	45.5787	24.2834
NWMN_RS08205	NWMN_1454	rpmG	890.979	27.5663	340.503	112.585	375.101	148.009	52.7919	51.8243
NWMN_RS08210	NWMN_1455	pbp3	105.548	2.59072	114.92	16.0847	89.7744	14.4161	137.378	23.0387
NWMN_RS08215	NWMN_1456	sodA	1077.74	21.0853	3158.37	168.726	1220.29	348.087	736.487	441.387
NWMN_RS08220	NWMN_1457	zur	51.6318	3.42539	97.931	19.8354	75.0236	32.4759	10.7365	2.15088
NWMN_RS08225	NWMN_1458		54.0089	3.74698	64.1971	24.6177	32.2178	2.74053	32.8367	19.5164
NWMN_RS08230	NWMN_1459		44.2923	5.29239	74.6002	22.9537	39.6836	29.5642	28.7574	14.2707
NWMN_RS08235	NWMN_1460	nfo	134.901	2.44889	114.565	12.8121	109.411	15.1653	106.193	16.9704
NWMN_RS08240	NWMN_1461	cshB	118.788	2.70551	75.2712	4.32551	71.4083	16.6016	88.4289	22.644
NWMN_RS08245	NWMN_1462		69.3991	4.30481	93.282	16.8628	98.1132	21.165	35.0354	13.5171
NWMN_RS08250	NWMN_1463		56.5104	2.20291	26.4576	16.6813	32.8677	1.4837	17.7202	2.81969
NWMN_RS08255	NWMN_1464	sigA	274.895	40.8734	424.3	4.66975	329.04	31.1581	147.332	44.3184
NWMN_RS08260	NWMN_1465	dnaG	153.044	10.6636	241.435	10.6483	165.592	19.6872	73.9481	34.5452
NWMN_RS08265	NWMN_1466		56.5706	4.20249	187.126	58.6607	73.9413	25.3661	86.5942	24.7677
NWMN_RS08270	NWMN_1467		46.1664	4.95317	101.353	42.8135	48.9902	19.7925	78.6006	4.11694
NWMN_RS08275	NWMN_1468	glyS, glyQS	412.206	56.6263	167.841	2.27363	321.83	34.5967	237.801	115.815
NWMN_RS08280	NWMN_1469	recO	73.571	4.95959	168.261	39.2919	117.322	17.3154	113.326	39.8299
NWMN_RS08285	NWMN_1470	era	84.4427	0.691116	173.42	42.7164	119.134	9.812	111.87	42.678
NWMN_RS08290	NWMN_1471	cdd	73.0868	5.17502	155.747	66.3343	101.136	42.246	95.7425	52.9525
NWMN_RS08295	NWMN_1472	dgkA	59.4217	6.55898	49.8186	25.8137	39.8325	21.8126	87.1529	57.0136
NWMN_RS08300	NWMN_1473	ybeY	62.042	2.75083	148.897	28.0106	69.792	16.0976	134.948	38.2463
NWMN_RS08305	NWMN_1474	phoH	54.3181	3.93905	191.649	40.118	103.761	16.7879	116.133	43.577
NWMN_RS08310	NWMN_1475		436.862	36.0578	441.307	54.4229	676.365	49.5556	464.254	119.291
NWMN_RS08315	NWMN_1476	floA	389.145	58.1021	547.296	48.3396	878.329	141.258	447.528	88.5597
NWMN_RS08320	NWMN_1477		390.309	63.6595	260.827	67.6564	378.42	122.707	439.073	102.409
NWMN_RS08325	NWMN_1478	rpsU	4087.92	620.691	4542.13	1454.74	3374.67	463.03	1234.73	388.05
NWMN_RS08330	NWMN_1479		157.187	9.76004	87.6252	16.4671	93.3322	30.7229	49.3757	15.3012
NWMN_RS08335	NWMN_1480		60.5957	1.60341	54.3607	22.5141	71.1912	16.1921	24.1535	5.82765
NWMN_RS08340	NWMN_1481	prmA	105.3	39.8751	227.935	28.6795	818.432	256.375	65.6637	15.849
NWMN_RS08345	NWMN_1482	dnaJ	81.4104	28.243	138.112	10.552	407.295	162.298	93.4161	11.8376
NWMN_RS08350	NWMN_1483	dnaK	339.529	134.59	2929.76	289.609	7648.99	256.733	809.613	431.123
NWMN_RS08355	NWMN_1484	grpE	265.83	105.555	2296.49	600.841	4552.96	824.251	426.074	237.327
NWMN_RS08360	NWMN_1485	hrcA	199.274	29.642	1183.56	323.418	2277.57	515.669	252.284	138.834
NWMN_RS08365	NWMN_1486	hemN	35.2616	3.59478	24.0316	7.17356	24.4539	3.41426	10.8061	1.86976
NWMN_RS08375	NWMN_1487	lepA	144.349	4.77706	104.323	14.7174	94.6244	28.2235	79.4529	26.0811
NWMN_RS08380	NWMN_1488	rpsT	2433	403.587	368.926	62.4418	760.61	407.848	190.014	119.294
NWMN_RS08385	NWMN_1489	holA	37.8232	1.78899	37.197	6.98637	33.3949	12.4412	14.7712	5.45738
NWMN_RS08390	NWMN_1490	comEC	9.57632	0.805177	11.1974	6.75661	17.0895	7.07546	10.8116	2.58924
NWMN_RS08395	NWMN_1491	comEB	70.796	10.2229	41.2072	17.6925	68.475	30.1405	96.3384	4.50612
NWMN_RS08400	NWMN_1492	comEA	25.1659	2.11236	19.7888	15.4738	18.2171	1.42555	14.7713	6.54144
NWMN_RS08405	NWMN_1493		148.216	5.17089	110.474	30.9601	79.7774	19.2747	57.9191	9.22427
NWMN_RS08410	NWMN_1494	rsfS	166.539	3.96498	166.971	35.4442	163.072	63.1767	123.076	47.8733
NWMN_RS08415	NWMN_1495		136.573	5.35025	56.4548	6.86977	55.1432	32.3875	59.3762	18.4393
NWMN_RS08420	NWMN_1496	nadD	147.784	0.684199	88.3481	31.5392	40.8902	17.9295	103.661	12.9759
NWMN_RS08425	NWMN_1497		95.2077	6.82129	60.0245	31.3671	13.6587	11.2755	22.3509	12.7195
NWMN_RS08430	NWMN_1498	aroE	95.1707	4.2482	39.1967	6.69308	37.7464	24.2318	47.8166	9.25625
NWMN_RS08435	NWMN_1499		104.076	1.73402	65.4307	17.7822	78.7411	18.575	57.1065	12.688
NWMN_RS08440	NWMN_1500		102.647	6.4053	58.355	20.9047	44.8144	23.1431	38.6846	11.2812
NWMN_RS08445	NWMN_1501	pfs, mtnN	80.8834	2.37522	62.8441	14.3034	55.0299	20.5383	30.1958	14.5253
NWMN_RS08455	NWMN_1502		23.0359	7.35365	16.4454	11.3877	5.80606	8.69218	3.74187	2.07113
NWMN_RS08460	NWMN_1503		5.64073	0.296247	15.7725	10.2507	7.48119	11.565	20.5146	13.0498
NWMN_RS08465	NWMN_1504		28.4006	5.83007	32.9841	7.86057	27.6692	10.6362	7.11122	2.35722
NWMN_RS08470	NWMN_1505		11.3959	4.70799	39.1213	12.5098	47.3269	5.45937	20.4754	4.15413
NWMN_RS08475	NWMN_1506		11.3767	4.58441	15.403	13.3936	13.2612	11.2928	25.3414	1.42086
NWMN_RS08480	NWMN_1507	accC	9.90124	4.73783	26.279	14.0841	20.4783	1.77596	38.927	22.6535
NWMN_RS08485	NWMN_1508	accB	7.19507	4.17901	24.8494	4.63183	4.93801	7.13643	6.77081	2.68158
NWMN_RS08490	NWMN_1509		7.224	4.08634	22.4131	8.95125	15.4963	2.57551	15.6384	8.27518
NWMN_RS08495	NWMN_1510		6.89878	4.08798	29.606	14.8263	8.49948	5.9385	11.2255	4.46267
NWMN_RS08500	NWMN_1511	greA	324.397	52.9078	309	71.9037	357.949	54.0267	118.335	43.2747
NWMN_RS08505	NWMN_1512	udk	240.147	63.8763	211.282	31.2784	173.087	93.4997	58.966	15.4424
NWMN_RS08510	NWMN_1513		172.937	42.6886	165.803	41.4655	124.95	61.4398	60.2155	8.65803
NWMN_RS08515	NWMN_1514		123.304	29.1414	79.2928	27.3763	78.5171	30.3124	38.89	23.5451
NWMN_RS08520	NWMN_1515		104.147	8.70452	35.4318	17.0842	25.4094	6.13408	10.4948	3.03281
NWMN_RS08525	NWMN_1516		311.023	17.1681	604.52	74.4328	934.918	314.878	539.781	35.716
NWMN_RS08530	NWMN_1517		222.068	11.7822	485.593	27.532	409.997	107.431	356.359	46.134
NWMN_RS08535	NWMN_1518		234.158	15.8555	278.248	54.2778	232.309	40.264	376.893	35.5096
NWMN_RS08540	NWMN_1519	alaS	109.269	5.49461	103.211	11.9295	126.95	21.3727	45.9667	15.2863
NWMN_RS08545	NWMN_1520	recD2	62.9705	5.9615	49.2792	1.09169	45.6487	5.35017	22.9076	4.07213
NWMN_RS08550	NWMN_1521		51.5913	3.12047	40.3734	2.48902	21.8962	9.8475	16.3567	1.47521
NWMN_RS08555	NWMN_1523	mnmA, trmU	112.182	19.9513	178.49	20.3236	137.286	52.5651	70.7641	17.2851
NWMN_RS08560	NWMN_1524		97.4391	9.12884	127.347	13.6046	82.0715	28.327	94.2823	18.0029
NWMN_RS08565	NWMN_1525		23.534	3.65261	62.5609	25.3365	44.651	12.2508	17.6134	11.9418
NWMN_RS08570	NWMN_1526		599.366	149.666	197.8	76.4811	148.376	91.1902	885.123	608.208
NWMN_RS08575	NWMN_1527	csbD	581.291	86.0253	198.36	43.4978	144.516	82.544	828.891	655.314
NWMN_RS08580	NWMN_1528		125.203	10.6917	166.122	52.1797	279.156	170.893	333.417	88.393
NWMN_RS08585	NWMN_1529		89.0567	4.06622	132.296	14.2377	148.836	6.65382	81.0467	22.8205
NWMN_RS08590	NWMN_1530		100.03	5.44521	56.3911	20.83	51.6169	15.0031	61.5522	5.34027
NWMN_RS08595			34.7807	3.6388	24.6831	18.9555	38.8197	46.6725	4.69881	4.23068
NWMN_RS08600	NWMN_1532	aspS	146.083	15.7592	73.0598	4.75736	133.431	6.18181	57.5605	13.2811
NWMN_RS08605	NWMN_1533	hisS	91.7773	9.39278	23.2599	5.34866	48.943	11.9778	44.7462	28.1142
NWMN_RS08610	NWMN_1534	lytH	142.067	23.1944	71.4888	17.9136	115.047	7.29377	66.504	21.6205
NWMN_RS08615	NWMN_1535	dtd	140.388	14.8349	97.2799	13.305	94.6059	30.7307	75.235	3.91502
NWMN_RS08620	NWMN_1536	relA	110.416	20.5853	60.7056	6.01973	92.9099	6.53508	113.53	43.3747
NWMN_RS08625	NWMN_1537	apt	142.562	13.967	81.2272	10.2322	100.366	22.9065	44.7953	8.91882
NWMN_RS08630	NWMN_1538	recJ	65.6629	6.74367	38.3182	10.8874	42.5474	5.53787	26.6822	5.05599
NWMN_RS08635	NWMN_1539	secF	286.81	26.1784	114.481	6.28808	172.257	48.7003	290.597	43.9018
NWMN_RS08640	NWMN_1540	yajC	566.416	27.761	182.174	29.9748	271.951	31.1072	213.074	42.8683
NWMN_RS08645	NWMN_1541	tgt	361.675	13.9115	79.2017	20.0907	119.648	13.4976	105.192	3.66821
NWMN_RS08650	NWMN_1542	queA	134.919	14.9975	61.5602	14.537	35.3419	4.64166	74.1125	18.2028
NWMN_RS08655	NWMN_1543	ruvB	140.097	16.1106	68.2093	24.3689	94.9274	1.53757	106.197	28.4816
NWMN_RS08660	NWMN_1544	ruvA	141.388	8.23714	67.6335	15.3585	77.1905	6.51354	91.2629	43.0318
NWMN_RS08665	NWMN_1545		118.55	17.2789	70.9452	10.243	81.1326	55.2954	47.0068	22.2634
NWMN_RS08670	NWMN_1546	obgE	149.33	10.3639	127.422	21.0435	104.968	3.8576	99.6746	23.4133
NWMN_RS08675	NWMN_1547	rpmA	2743.84	105.325	1595.67	357.779	1923.37	195.347	1005.58	26.1024
NWMN_RS08680	NWMN_1548		2639.86	284.748	1106.19	122.988	799.375	328.664	706.425	172.423
NWMN_RS08685	NWMN_1549	rplU	3889.06	292.238	2217.78	196.54	1493.66	131.011	975.599	99.4199
NWMN_RS08690	NWMN_1550	mreD	84.2931	17.4085	63.016	13.2616	54.4111	23.3799	41.3143	6.52269
NWMN_RS08695	NWMN_1551	mreC	77.8066	4.22591	104.05	14.8325	74.4998	31.7393	50.3921	34.5066
NWMN_RS08700			40.2207	11.0306	482.974	159.362	410.363	123.581	87.5118	81.0347
NWMN_RS08705	NWMN_1552		32.0027	1.90574	593.631	91.0426	461.841	75.5505	61.035	38.1401
NWMN_RS08710	NWMN_1554		98.3679	9.56215	52.0341	33.2653	84.3039	66.0505	68.0506	42.1004
NWMN_RS08715	NWMN_1555	radC	5.99278	1.41135	13.6196	8.25396	21.3251	9.21947	39.5001	20.199
NWMN_RS08720	NWMN_1556		5.33954	0.997187	16.3229	12.0605	4.62758	6.61164	22.0131	1.72942
NWMN_RS08725			0.48163	0.1013	2.68094	1.9351	0.593836	0.958737	4.01745	2.36658
NWMN_RS08730	NWMN_1557	folC	206.783	12.8807	136.905	13.2999	174.912	48.0462	72.9449	38.5893
NWMN_RS08735	NWMN_1558	valS	182.486	8.20408	92.9336	9.88394	123.787	5.22597	79.4319	7.58282
NWMN_RS08740	NWMN_1559	tag	75.8524	10.3469	53.3768	8.47889	40.8941	19.728	67.9941	19.6776
NWMN_RS08745	NWMN_1560	abrB	48.3537	4.13971	175.909	14.2948	87.7248	12.8933	27.6569	12.8644
NWMN_RS08750			21.9262	1.96213	20.8343	32.8372	58.4985	101.247	6.69878	5.81652
NWMN_RS08755	NWMN_1561	hemL, hemL1	137.59	5.89184	203.355	9.44283	171.88	29.7157	172.21	29.701
NWMN_RS08760	NWMN_1562	hemB	93.2306	0.798283	115.347	10.9394	81.221	20.801	143.037	22.995
NWMN_RS08765	NWMN_1563	hemD	66.7978	5.88851	36.3096	22.1832	35.9361	12.2025	25.0428	20.6287
NWMN_RS08770	NWMN_1564	hemC	128.603	4.89581	88.2223	9.49585	88.5535	11.0137	125.172	64.0997
NWMN_RS08775	NWMN_1565	hemX	90.5531	12.0767	50.4045	5.3222	44.2339	6.87034	45.5657	26.5934
NWMN_RS08780	NWMN_1566	hemA	298.016	19.6885	485.637	50.4606	386.162	55.3982	689.363	178.765
NWMN_RS08785	NWMN_1567	engB	36.7761	1.0001	67.4893	10.6177	21.6035	2.85614	24.2053	13.3049
NWMN_RS08790	NWMN_1568	clpX	452.415	81.9797	901.834	91.71	669.812	191.343	232.107	36.0751
NWMN_RS08795	NWMN_1569	tig	908.944	25.4818	984.553	145.196	631.946	57.7641	440.272	9.31852
NWMN_RS08800			115.13	21.3752	13.0245	15.993	10.3064	16.3044	28.8171	36.5604
NWMN_RS08805	NWMN_1570		83.8307	0.262638	38.8615	5.64153	41.5315	13.1098	24.8907	10.0305
NWMN_RS08810	NWMN_1571		98.7696	6.20363	36.2022	2.63205	23.7883	7.56378	113.504	33.5901
NWMN_RS08815			224.678	114.664	2.73227	1.95774	0.620614	0.978168	25.6303	32.1392
NWMN_RS08820	NWMN_1572	rplT	1445.3	154.612	225.091	81.8604	340.923	41.407	284.705	73.7376
NWMN_RS08825	NWMN_1573	rpmI	1778.48	82.874	235.451	121.967	156.679	88.835	329.27	54.2385
NWMN_RS08830	NWMN_1574	infC	1330.65	164.338	207.5	16.0043	310.913	108.402	410.084	66.9941
NWMN_RS08835	NWMN_1575	lysP	94.4774	1.56904	25.2622	5.15455	44.913	1.4551	92.6568	12.9179
NWMN_RS08840	NWMN_1576	thrS	320.727	30.1122	129.99	27.6062	353.589	70.8007	2094.36	432.968
NWMN_RS08845			216.091	18.8306	149.162	71.9209	74.1446	74.0908	508.359	41.7478
NWMN_RS08850	NWMN_1577	dnaI	127.74	13.4834	102.408	23.7978	95.6183	36.936	152.453	4.35371
NWMN_RS08855	NWMN_1578	dnaB	104.987	13.3818	80.9821	18.7821	72.2181	16.3048	88.9912	40.1164
NWMN_RS08860	NWMN_1579	nrdR	132.651	27.1436	107.423	27.4387	114.311	7.33398	112.623	22.8438
NWMN_RS08865	NWMN_1580	gapB	18.6757	1.7715	325.073	62.6684	137.789	15.1954	490.374	335.662
NWMN_RS08870	NWMN_1581	coaE	89.5743	2.99647	189.3	17.6114	129.463	33.2909	103.106	54.0823
NWMN_RS08875	NWMN_1582	mutM	84.815	2.73616	208.141	42.4187	94.1167	11.9086	62.2342	26.7587
NWMN_RS08880	NWMN_1583	polA	75.0186	2.18917	132.622	2.78829	103.812	18.7695	52.3265	23.8958
NWMN_RS08885	NWMN_1584		23.0523	5.78372	32.1688	10.2979	19.9221	4.4042	26.8344	17.6719
NWMN_RS08890	NWMN_1585	phoR	46.8906	1.29728	186.863	16.9716	134.311	10.8152	72.2265	51.003
NWMN_RS08895	NWMN_1586	phoP	49.9427	2.90104	86.7582	20.3409	60.4539	38.4484	137.613	27.7909
NWMN_RS08900			9.17955	0.336622	2.74282	1.96608	0.644578	1.00711	11.2124	3.56579
NWMN_RS08905	NWMN_1587	citC	36.416	13.3312	1400.93	129.053	1053.85	137.608	149.367	57.8998
NWMN_RS08910	NWMN_1588	citZ	30.3569	6.45751	807.504	92.381	655.279	131.829	119.509	71.3971
NWMN_RS08915	NWMN_1589	aapA	347.118	11.7621	83.1477	15.7547	194.446	35.8963	201.916	62.5631
NWMN_RS08930	NWMN_1592	pykA	667.826	5.66489	331.342	24.8162	646.205	105.225	517.729	262.525
NWMN_RS08935	NWMN_1593	pfkA	522.345	8.10093	155.067	23.3063	275.511	97.0753	382.627	121.978
NWMN_RS08940	NWMN_1594	accA	178.178	18.7227	279.369	8.4289	270.987	85.7207	111.384	42.0622
NWMN_RS08945	NWMN_1595	accD	156.531	21.4114	220.877	10.3179	223.561	38.4322	99.021	19.6386
NWMN_RS08950	NWMN_1596	maeB	132.234	11.8323	167.199	13.3257	125.708	15.5814	93.3882	25.8334
NWMN_RS08955	NWMN_1597	dnaE	55.9238	1.06799	91.797	8.33111	68.9631	14.3794	39.9218	7.37318
NWMN_RS08960	NWMN_1598		55.6477	2.27142	99.4099	16.4756	74.0348	4.95422	36.3619	20.3745
NWMN_RS08965	NWMN_1599		48.7004	2.68771	71.7266	16.2965	90.2788	19.1295	55.3312	12.3134
NWMN_RS08970	NWMN_1600		485.731	78.0678	559.406	45.1986	593.869	274.293	550.892	211.558
NWMN_RS08975	NWMN_1601		123.4	15.7936	195.047	8.44302	152.726	49.1581	194.192	146.049
NWMN_RS08980	NWMN_1602		53.9863	1.40789	158.658	15.5984	108.93	2.17749	96.8227	46.7346
NWMN_RS08985			29.2954	2.41651	38.7475	37.0444	22.6214	18.0446	4.76935	2.47716
NWMN_RS08990	NWMN_1603	ald	30.5046	1.29131	767.581	48.5633	257.958	74.9417	147.524	67.3403
NWMN_RS08995	NWMN_1604	ups	88.4435	15.1639	2660.61	282.034	3043.81	715.93	3857.11	1571.54
NWMN_RS09000	NWMN_1605	ackA	319.32	8.53223	202.031	47.8621	228.794	37.9677	448.034	150.155
NWMN_RS09005	NWMN_1606		73.8611	8.13035	39.5653	21.3006	33.3108	11.43	26.3081	7.54199
NWMN_RS09010	NWMN_1607	tpx	419.231	18.2132	570.067	17.5794	278.533	64.8024	169.7	82.7915
NWMN_RS09015	NWMN_1608		38.5918	7.6904	12.9854	7.60649	8.47212	5.74504	67.8041	16.5889
NWMN_RS09020	NWMN_1609	thiI	38.1697	9.13682	28.732	7.96094	27.1481	4.962	34.5899	7.72385
NWMN_RS09025	NWMN_1610		34.9744	7.32408	25.1413	7.14869	15.4015	2.50082	28.075	8.6926
NWMN_RS09030			4.15991	0.870541	2.77367	1.98813	0.676146	1.04447	4.08764	5.50612
NWMN_RS09035	NWMN_1611	ezrA	261.787	26.4809	326.96	34.2295	286.836	37.9493	244.269	75.0948
NWMN_RS09040	NWMN_1612		85.2777	15.0699	51.6312	6.18004	70.8073	41.5063	18.1654	10.1918
NWMN_RS09045	NWMN_1613	rpsD	2782.47	303.271	680.131	112.381	760.707	170.626	491.677	190.413
NWMN_RS09050			10.4629	1.46141	2.7913	1.99644	0.682457	1.05263	5.04401	2.14086
NWMN_RS09055	NWMN_1614		18.1064	0.853749	63.438	6.42181	26.156	9.03185	28.1469	10.6149
NWMN_RS09060	NWMN_1615		38.1952	4.36607	123.224	8.47127	75.0135	33.7299	89.1638	31.0873
NWMN_RS09065	NWMN_1616		31.1526	7.10017	29.9536	10.1385	76.2687	37.5244	40.1081	8.44611
NWMN_RS09070	NWMN_1617	serA	35.717	9.17457	44.7441	8.6762	124.115	42.9988	59.9557	33.4961
NWMN_RS09075			23.8898	8.55825	2.91933	2.04374	0.733348	1.0273	11.6486	6.78456
NWMN_RS09080	NWMN_1618		40.183	8.87285	39.5398	6.9253	53.2762	18.8678	50.1769	16.793
NWMN_RS09085	NWMN_1619	ptaA	113.008	8.38045	87.2429	8.99925	90.5648	22.1997	110.332	18.0266
NWMN_RS09090	NWMN_1620	plsC	104.662	10.2125	84.0794	35.1259	68.5345	17.8286	58.5737	2.89645
NWMN_RS09095	NWMN_1621		130.394	15.1327	140.774	16.8667	148.134	11.4325	150.3	22.5886
NWMN_RS09100	NWMN_1622	tyrS	105.526	6.40817	42.5262	19.1446	43.3476	13.5044	28.3276	8.60365
NWMN_RS09105	NWMN_1623	sgtA	23.6693	3.26895	31.3624	8.98056	18.8028	1.98505	13.5225	0.996526
NWMN_RS09110			16.1349	4.93665	2.9821	2.04015	0.758768	1.03465	7.10777	1.08261
NWMN_RS09115	NWMN_1624		8.08855	0.606975	21.148	5.42877	17.588	3.708	49.1467	1.70178
NWMN_RS09120			0.756589	0.618336	2.99842	2.05003	0.778154	1.03103	0.917252	1.58873
NWMN_RS09125	NWMN_1625	fhs	131.078	44.3109	643.072	85.7599	383.265	72.1546	187.907	38.1709
NWMN_RS09130	NWMN_1626	acsA	10.2889	0.295034	78.7952	10.4114	65.9768	19.8702	85.0817	21.2673
NWMN_RS09135	NWMN_1627	acuA	4.77067	0.217777	31.4049	6.00901	22.0446	14.605	45.9824	23.0742
NWMN_RS09140	NWMN_1628	acuC	8.84352	0.523272	44.7318	15.9934	7.95019	11.7679	83.7666	28.0752
NWMN_RS09145	NWMN_1629	ccpA	221.462	11.2882	415.384	24.1343	210.396	31.8923	167.911	59.0899
NWMN_RS09150			3.398	1.63325	3.05291	2.04712	0.834079	1.02879	0.97468	1.68819
NWMN_RS09155	NWMN_1630		131.901	30.754	84.9181	22.3678	205.087	12.189	99.7603	24.0784
NWMN_RS09160			4.51699	1.34554	3.07375	2.05213	0.865474	1.03167	6.95451	6.03788
NWMN_RS09165	NWMN_1631		207.894	34.4268	191.894	36.2063	92.1282	24.8932	369.064	104.954
NWMN_RS09170	NWMN_1632		996.47	84.9558	395.531	89.8	588.123	205.215	918.736	501.075
NWMN_RS09175	NWMN_1633	murC	205.103	4.62648	149.224	27.9966	96.0532	11.4666	89.9911	29.5146
NWMN_RS09180	NWMN_1634		176.787	3.91556	96.4145	0.816587	76.1972	9.23338	127.917	41.7005
NWMN_RS09185	NWMN_1635		129.428	8.07035	75.9401	15.2251	79.3369	36.8182	51.4154	27.4974
NWMN_RS09190	NWMN_1636		121.026	1.46376	75.706	14.2605	44.3107	19.7658	25.2474	12.554
NWMN_RS09195	NWMN_1637		82.0989	7.32694	192.202	43.5536	110.45	51.9732	50.872	24.4178
NWMN_RS09200	NWMN_1638		50.6486	2.59695	216.906	36.9182	141.752	59.5509	66.2647	8.62794
NWMN_RS09205	NWMN_1639		202.031	62.9533	76.87	6.64578	107.172	47.0497	98.2362	17.7346
NWMN_RS09210	NWMN_1640		31.0695	2.11454	83.5827	15.6901	71.2259	28.665	42.9512	5.87547
NWMN_RS09215	NWMN_1641	trmB	288.513	17.7362	273.935	28.7762	273.618	16.8413	100.333	21.1433
NWMN_RS09220	NWMN_1642		393.276	35.2946	288.741	76.7004	337.219	52.4483	212.404	31.596
NWMN_RS09225	NWMN_1643	dat	94.446	12.8495	103.998	7.38152	155.326	29.4533	281.551	28.2962
NWMN_RS09230	NWMN_1644		110.995	15.9004	88.8963	9.3301	115.479	18.5945	270.644	57.2491
NWMN_RS09235	NWMN_1645		176.914	11.4563	125.299	20.5899	88.6764	37.4115	156.214	111.532
NWMN_RS09240	NWMN_1646		104.635	3.94699	74.0933	14.3119	54.9379	15.3051	62.778	14.0322
NWMN_RS09245	NWMN_1647	murJ?	74.2294	8.75746	67.9956	6.97367	53.7837	12.1472	35.0277	10.6479
NWMN_RS09250	NWMN_1648		37.5281	1.03185	49.4262	17.4033	28.1926	4.19679	83.4043	31.392
NWMN_RS09255	NWMN_1649		8.69842	0.647377	19.4897	3.14294	20.342	1.64143	26.4975	4.22339
NWMN_RS09260	NWMN_1650		63.3772	6.25779	93.1902	8.78431	58.9606	27.6752	11.8155	6.04096
NWMN_RS09265	NWMN_1651	leuS	123.538	4.2966	66.1591	2.73877	63.9226	9.99335	46.3202	4.00575
NWMN_RS09270	NWMN_1652		49.2142	2.9705	44.5258	8.25539	30.8662	10.7654	58.8303	14.245
NWMN_RS09275	NWMN_1653		94.4491	9.61433	79.4846	16.9636	61.8478	10.3124	22.794	2.81729
NWMN_RS09280	NWMN_1654		89.9833	10.8194	77.8818	2.35499	47.0363	22.0998	15.6497	11.8964
NWMN_RS09285			227.814	51.6253	198.99	33.0824	226.847	72.8045	368.613	111.046
NWMN_RS09295	NWMN_1656	tnp	9.38843	1.03114	8.46568	7.25966	15.5324	4.1621	7.40718	4.10813
NWMN_RS09300	NWMN_1657		89.121	6.58496	216.26	56.1708	155.891	17.8794	112.163	38.4914
NWMN_RS09305			3.50427	1.30853	3.12628	2.08781	0.887182	1.04504	2.14796	2.77638
NWMN_RS09310	NWMN_1658	putA	25.8442	13.3892	123.169	31.338	83.8369	34.8003	145.126	63.7695
NWMN_RS09315	NWMN_1659	ribH	43.3844	66.7925	123.786	42.4782	115.619	63.3123	22.6741	4.24337
NWMN_RS09320	NWMN_1660	ribA	42.5693	63.155	97.4466	11.3915	85.4512	31.9934	36.2554	18.4517
NWMN_RS09325	NWMN_1661	ribB	40.6837	64.7274	97.3788	48.6905	46.5327	10.8556	21.5798	16.0035
NWMN_RS09330	NWMN_1662	ribD	59.1361	71.0973	135.31	19.5287	117.373	67.0804	16.3289	6.97818
NWMN_RS09335	NWMN_1663		18.1307	1.17911	13.2814	7.63879	13.074	2.13643	13.7323	1.60528
NWMN_RS09340	NWMN_1664	arsR	41.4085	5.08685	3.15484	2.09538	16.1245	16.5727	30.1186	20.6037
NWMN_RS09345	NWMN_1665	arsB	35.246	3.80201	29.4337	8.02925	31.817	6.10851	17.5751	4.09218
NWMN_RS09350	NWMN_1666	arsC	34.6408	1.62668	27.6632	9.38842	33.5558	17.5962	11.703	5.80491
NWMN_RS09355	NWMN_1667	sagB	300.613	35.7235	294.19	45.0392	227.331	26.0933	145.644	59.4841
NWMN_RS09360			65.6375	4.18927	102.16	35.1516	49.8408	12.9352	17.7342	12.6047
NWMN_RS09365	NWMN_1668	sigS	28.8718	3.33299	9.55718	8.97074	5.08786	7.01507	4.83848	0.715478
NWMN_RS09370	NWMN_1669		40.7295	7.39173	7.89784	6.08247	9.55061	6.43025	7.30487	0.992978
NWMN_RS09375	NWMN_1670		75.8957	21.1655	15.7866	9.58227	26.0316	9.59695	8.0104	1.34787
NWMN_RS09380	NWMN_1671		14.2751	1.49145	14.384	10.0827	11.7926	8.49841	15.2713	9.22936
NWMN_RS09385	NWMN_1672		315.788	72.6062	527.535	124.717	314.719	33.8173	425.916	67.0793
NWMN_RS09390	NWMN_1673		64.9042	20.5877	3.2236	2.11655	45.7964	21.5223	11.9902	2.1876
NWMN_RS09395	NWMN_1674	crcB	23.5173	3.77297	3.26095	2.10552	0.925979	1.09675	8.65889	5.72052
NWMN_RS09400	NWMN_1675	crcB	16.8242	0.740753	3.28784	2.10637	5.66533	7.48418	24.7266	17.1662
NWMN_RS09415	NWMN_1678		30.5314	0.78606	94.1848	17.6908	88.4894	44.1566	27.3073	6.51444
NWMN_RS09420	NWMN_1679		246.364	13.8175	95.1974	27.3076	105.407	5.04367	148.637	28.6139
NWMN_RS09425	NWMN_1680	metK	170.534	140.738	214.893	35.3454	254.69	53.3268	140.566	178.732
NWMN_RS09430	NWMN_1681	pckA	14.1657	0.474259	1191.64	78.1517	409.198	77.7236	454.479	192.451
NWMN_RS09435	NWMN_1682	tnp	32.0353	1.23498	46.5475	19.7787	33.2713	18.3052	21.1687	12.8976
NWMN_RS09440	NWMN_1683		32.4393	1.18174	44.5807	12.6492	59.0276	31.4563	108.719	61.3172
NWMN_RS09445	NWMN_1684		27.5355	0.791081	22.2733	7.0212	5.23832	6.74239	70.0443	57.2306
NWMN_RS09450			76.8584	11.8659	79.345	29.8613	99.4493	19.9331	101.504	46.5312
NWMN_RS09455	NWMN_1685	menC	32.0097	1.92946	42.4958	13.0059	28.7325	10.9682	38.6016	9.72506
NWMN_RS09460	NWMN_1686	menE	30.8984	2.64463	32.663	5.02437	26.9356	1.56544	54.8778	7.09413
NWMN_RS09465	NWMN_1687		5.51402	0.489165	3.3158	2.09815	11.918	9.82831	11.3797	4.13801
NWMN_RS09470			19.7628	3.25825	134.098	5.92684	49.2977	15.4665	304.885	23.9136
NWMN_RS09475	NWMN_1689		19.3912	3.23877	147.523	11.2769	91.1274	25.5408	254.586	29.8869
NWMN_RS09480	NWMN_1690		6.96563	1.09049	8.82662	10.9584	13.1984	10.991	37.2916	26.0083
NWMN_RS09485	NWMN_1691		7.70735	0.797462	15.7369	22.742	0.971735	1.11582	19.4547	15.5832
NWMN_RS09490	NWMN_1692		9.78039	0.271185	12.0396	12.9564	26.1257	12.7315	14.5407	10.2359
NWMN_RS09495	NWMN_1693		20.7164	6.54173	7.54774	5.14674	15.4748	2.89738	15.6786	12.9635
NWMN_RS09500			3.38245	1.10894	3.43213	2.07837	0.999418	1.11655	6.47597	6.28177
NWMN_RS09505			8.15331	2.15415	3.46001	2.06695	19.7962	16.8059	15.4962	10.2918
NWMN_RS09510	NWMN_1694		20.3612	0.661065	33.8725	25.8987	19.456	0.579187	43.9423	16.2834
NWMN_RS09515			10.6398	0.602673	10.0945	9.40729	1.0246	1.13674	14.5679	10.4246
NWMN_RS09520	NWMN_1695		12.8368	1.17539	3.49146	2.06971	1.04528	1.13206	20.7364	2.97974
NWMN_RS09525			17.2497	3.80383	21.4561	32.368	30.5563	27.8931	6.39629	1.03818
NWMN_RS09530	NWMN_1696		31.9279	5.41431	20.537	14.0062	14.6253	12.4016	5.91235	0.833958
NWMN_RS09535			18.4858	4.67123	17.587	0.439459	13.3521	1.35524	6.50837	0.780885
NWMN_RS09545	NWMN_1699	hsdS	27.967	1.63255	22.1489	10.1009	16.0402	1.61285	19.6422	12.4169
NWMN_RS09550	NWMN_1700	hsdM	30.3415	3.32319	16.665	11.6674	15.3805	2.23036	47.8181	19.163
NWMN_RS09555			1.30729	0.534641	3.54866	2.05841	1.11845	1.1155	13.3974	8.27278
NWMN_RS09560	NWMN_1701	splF	5.59186	1.46121	3.5789	2.07403	32.6333	18.3749	61.376	15.0147
NWMN_RS09565	NWMN_1702	splE	2.59486	1.93547	7.58862	4.84747	12.4474	12.0712	50.385	43.644
NWMN_RS09570	NWMN_1703	splD	2.16394	1.37778	16.1304	10.0906	10.3393	6.88079	70.9931	33.5045
NWMN_RS09575	NWMN_1704	splC	5.41858	1.43872	3.63361	2.09918	16.7566	17.4062	61.9918	29.2333
NWMN_RS09580	NWMN_1705	splB	6.17166	0.800644	15.9063	9.53448	17.2859	4.43642	105.346	22.9312
NWMN_RS09585	NWMN_1706	splA	7.09243	0.93283	13.2575	17.946	11.3868	9.9403	57.8375	35.5714
NWMN_RS09590			9.87751	1.73303	3.67233	2.10416	1.17561	1.1183	14.8346	3.62273
NWMN_RS09595	NWMN_1708		16.0562	2.77463	28.7544	16.1911	10.194	6.90637	21.0533	6.35849
NWMN_RS09605	NWMN_1710	bsaE	10.8839	1.39298	54.4463	14.6637	33.1129	8.24129	68.1155	60.1135
NWMN_RS09610	NWMN_1711	bsaF	13.5173	0.879534	63.2191	7.68953	39.007	18.2343	87.0508	99.1365
NWMN_RS09615	NWMN_1712	bsaP	7.86248	0.594032	19.0148	2.46458	20.6562	6.66971	23.6843	6.28078
NWMN_RS09620	NWMN_1713	bsaD	3.42315	1.12095	7.93155	5.2454	1.23301	1.13008	6.95649	1.30921
NWMN_RS09625	NWMN_1714	bsaC	4.77398	0.445033	14.4403	8.27944	5.52922	7.06402	8.22081	1.25029
NWMN_RS09630	NWMN_1715	bsaB	6.93665	1.35638	12.9266	7.41551	12.7513	1.06653	8.17522	1.04468
NWMN_RS09635	NWMN_1716	bsaA2	7.33234	0.703738	15.1059	20.6535	23.0667	20.0412	7.8374	2.12896
NWMN_RS09640	NWMN_1717	bsaA1	8.90888	1.37802	17.2136	21.2388	15.2488	23.748	146.077	73.6334
NWMN_RS09645	NWMN_1718	lukD	11.0032	1.37409	39.5125	10.6055	40.746	26.9948	345.508	171.376
NWMN_RS09650	NWMN_1719	lukE	8.65468	0.5402	33.8771	3.38436	39.5852	35.7967	288.157	230.648
NWMN_RS09655	NWMN_1720		8.28017	0.54138	12.5736	16.6178	15.9577	5.85729	6.92292	3.24965
NWMN_RS09660	NWMN_1721		35.4622	7.17379	98.4609	21.764	82.8173	23.483	13.8549	5.11087
NWMN_RS09705	NWMN_1722		56.6638	2.41613	28.7841	21.0677	34.5353	9.26652	79.1253	14.2942
NWMN_RS09710			42.5067	3.80723	3.76599	2.11697	1.33697	1.12111	98.3266	23.4098
NWMN_RS09715	NWMN_1723	hemY	56.8464	8.73076	125.295	8.9161	123.32	32.8878	104.394	13.6163
NWMN_RS09720	NWMN_1724	hemH	53.7191	5.89275	80.0354	19.9267	61.829	13.5468	74.4455	17.3063
NWMN_RS09725	NWMN_1725	hemE	55.5746	2.6461	70.4963	7.72125	53.0124	8.4724	61.3665	26.4822
NWMN_RS09730			13.6327	2.17745	19.99	25.9623	10.8886	15.8348	7.7229	6.5009
NWMN_RS09735	NWMN_1726	TRAP	386.329	93.528	219.886	51.1938	271.507	72.7935	175.191	25.7709
NWMN_RS09740	NWMN_1727		73.7235	6.03471	71.2154	14.7908	110.013	3.34032	77.2891	21.499
NWMN_RS09745	NWMN_1728		88.0218	4.88985	72.8785	16.1306	108.37	30.7105	108.385	24.3885
NWMN_RS09750	NWMN_1729	hit	145.637	22.6122	161.739	20.6697	98.6592	26.61	140.736	37.0505
NWMN_RS09755	NWMN_1730		260.919	31.2134	205.621	29.5199	314.962	28.7531	511.939	242.974
NWMN_RS09760	NWMN_1732		42.3848	15.3499	18.0884	13.184	18.3328	5.31756	5.10515	1.88482
NWMN_RS09765	NWMN_1733	prsA	168.323	25.8531	838.256	153.738	723.253	159.738	294.248	52.3484
NWMN_RS09770	NWMN_1734	cbf1	180.188	16.9975	156.77	15.5654	170.208	17.2053	195.715	31.4863
NWMN_RS09775	NWMN_1735		128.243	13.8729	110.074	14.1566	106.641	19.9788	107.895	37.1602
NWMN_RS09780	NWMN_1736		107.682	18.0686	75.6225	6.62493	79.9333	34.3874	116.078	30.9841
NWMN_RS09785			7.20503	2.09134	3.83492	2.07355	1.36929	1.1235	24.3983	5.33334
NWMN_RS09790	NWMN_1737		1712.93	394.164	1686.22	61.8797	1676.71	796.208	816.044	217.063
NWMN_RS09795	NWMN_1738		44.0753	2.40302	58.363	2.82882	46.7543	8.2517	7.0663	1.20801
NWMN_RS09800	NWMN_1739	xdrA	366.543	56.0661	88.6212	17.2953	132.287	12.9483	143.89	21.3548
NWMN_RS09805	NWMN_1740	airR	61.1064	7.52829	33.0121	10.4608	46.4461	24.1569	18.9183	1.38556
NWMN_RS09810	NWMN_1741	airS	46.3271	5.46243	39.3505	16.7308	33.4796	12.0776	29.8219	10.5149
NWMN_RS09815	NWMN_1742		107.87	8.0039	86.2042	31.767	87.5344	28.7467	69.3322	15.6511
NWMN_RS09820	NWMN_1743	fumC, citG	48.6791	5.87273	196.361	30.9157	145.842	37.9514	120.234	21.3655
NWMN_RS09825	NWMN_1744		58.8529	15.2807	39.4458	10.8061	37.7486	15.8641	6.21647	1.48436
NWMN_RS09830	NWMN_1745		12.5898	1.63295	3.85492	2.06821	28.9488	14.2056	5.28318	0.990973
NWMN_RS09835			234.141	21.2412	134.128	15.3311	67.2852	30.2582	245.377	201.668
NWMN_RS09840	NWMN_1746		300.172	14.6152	273.851	20.2548	225.458	51.3537	498.642	285.236
NWMN_RS09845	NWMN_1747		46.0716	1.32514	24.3942	19.7204	28.0255	9.26599	21.9858	7.45106
NWMN_RS09850	NWMN_1748	queG	50.1701	1.42355	35.8358	1.01323	39.2358	3.91468	61.298	45.132
NWMN_RS09855	NWMN_1749		25.4865	4.40571	13.3383	11.5623	61.0799	52.0508	29.3979	10.6551
NWMN_RS09860	NWMN_1750	glnP	19.9999	4.19224	19.5579	4.73136	19.8379	9.60863	15.6858	1.7598
NWMN_RS09865	NWMN_1751		65.0351	8.45448	46.9068	17.3623	72.1032	10.8824	21.4226	6.42575
NWMN_RS09870	NWMN_1752	tnp	20.4822	1.25004	31.5494	8.11357	9.6516	13.6076	16.4911	10.7407
NWMN_RS10025	NWMN_1753		380.825	15.7545	2624.57	344.067	1813.65	455.119	678.552	153.768
NWMN_RS10030	NWMN_1754		49.3658	5.32342	95.7561	25.6309	90.3841	13.4862	38.5888	26.0886
NWMN_RS10035	NWMN_1755		53.2568	6.0109	124.154	19.6458	53.0184	24.3692	45.1125	22.8644
NWMN_RS10040	NWMN_1756	gsaB, hemL2	52.4196	3.54907	117.89	23.7308	135.275	26.7593	83.5609	29.5867
NWMN_RS10045	NWMN_1757		70.8428	5.28154	157.792	7.09182	104.744	41.8508	62.735	28.1203
NWMN_RS10050			19.6474	7.95916	3.88972	2.05958	22.106	35.0725	3.9404	3.86341
NWMN_RS10055	NWMN_1758		31.1535	15.1231	44.0159	9.72292	49.5993	7.17024	15.7721	4.61617
NWMN_RS10060	NWMN_1759	cvfE	80.9515	2.73807	278.133	0.507032	188.978	31.9107	52.8347	27.6915
NWMN_RS10065	NWMN_1760	mutY	32.5443	1.4855	44.0531	15.6563	45.9802	13.0937	21.3561	1.9493
NWMN_RS10070	NWMN_1761		49.7357	2.88873	676.969	87.7246	400.703	171.949	88.196	25.6502
NWMN_RS10075			54.0931	6.43099	3.91593	2.05478	1.44198	1.12718	19.7296	8.81593
NWMN_RS10080	NWMN_1762		65.9569	12.7546	53.2147	6.85561	36.5811	16.2319	39.1533	5.59031
NWMN_RS10085	NWMN_1763		51.8971	5.93994	37.5063	14.6494	26.9608	12.9689	45.9437	20.1204
NWMN_RS10090	NWMN_1764		49.9835	4.32159	49.2241	6.67243	22.0892	7.82276	85.7685	10.3026
NWMN_RS10095	NWMN_1765	recX	24.6275	1.90436	32.7035	14.9339	32.3011	2.7949	23.1583	6.93449
NWMN_RS10100	NWMN_1766	sgtB, mgt	56.6636	2.91591	235.858	35.7179	158.484	22.8841	41.4416	32.4284
NWMN_RS10105	NWMN_1767		297.975	12.0883	308.001	21.9645	190.925	27.7447	377.558	200.783
NWMN_RS10110	NWMN_1768		83.72	1.7977	38.0837	33.8122	42.9449	37.1012	7.70156	1.53698
NWMN_RS10115	NWMN_1769	ytA	7.29063	55.7521	17.7453	11.6691	14.7226	1.47261	42.7828	25.4809
NWMN_RS10120	NWMN_1770		5.21576	41.3069	3.95144	2.06387	1.47916	1.13742	12.271	2.86249
NWMN_RS10125	NWMN_1771		0	0	10.6741	9.55437	1.49853	1.13289	3.09892	5.36748
NWMN_RS10130	NWMN_1772		0.0363239	4.08039	23.17	6.14572	1.51737	1.13997	4.83297	1.88707
NWMN_RS10135	NWMN_1773		2.96705	20.8354	11.3629	5.65099	15.4441	2.24384	12.6069	3.21649
NWMN_RS10140	NWMN_1774		5.23274	19.7953	12.1351	15.4348	1.537	1.13624	18.6843	13.1351
NWMN_RS10145			0	0	4.0099	2.08059	1.57257	1.11999	0	0
NWMN_RS10150	NWMN_1775		6.68526	35.6798	17.8715	11.3406	39.2565	25.6779	29.9393	16.1893
NWMN_RS10155	NWMN_1776		3.44469	17.4605	4.04333	2.08599	15.7288	24.2063	24.0807	9.80955
NWMN_RS10160	NWMN_1777		6.20127	24.9486	18.2946	4.80421	20.9663	3.02781	30.0193	6.23712
NWMN_RS10165	NWMN_1778		5.52511	28.3199	23.2162	5.91823	26.1403	3.78552	35.0317	22.3419
NWMN_RS10170	NWMN_1779		5.42972	32.9341	28.0202	10.7923	31.7157	13.9889	33.6988	30.217
NWMN_RS10175	NWMN_1780		9.90377	45.9762	29.3976	11.926	37.3639	9.53528	27.538	8.43725
NWMN_RS10180	NWMN_1781		6.38593	56.8634	11.5419	10.87	15.2689	10.7371	14.0973	12.3018
NWMN_RS10185	NWMN_1782		6.99041	56.9284	20.5082	13.4234	20.118	6.31927	79.0638	51.2209
NWMN_RS10190	NWMN_1783		13.2447	123.333	26.1146	17.9714	61.2454	16.2426	128.826	81.3296
NWMN_RS10195	NWMN_1784		9.07141	102.572	34.8658	30.3213	48.7536	53.9015	17.6699	20.3802
NWMN_RS10200	NWMN_1785		8.8288	106.025	29.7697	21.3756	47.1041	30.701	45.4287	36.0456
NWMN_RS10205	NWMN_1786		10.2126	118.874	17.4292	12.2676	31.561	15.8293	76.3731	54.4253
NWMN_RS10210	NWMN_1787		9.50675	112.225	76.9153	18.1127	48.4051	24.3613	16.8229	8.71759
NWMN_RS10215	NWMN_1788		7.91522	96.7863	43.1069	10.7966	68.9574	38.9766	8.78165	0.948339
NWMN_RS10220	NWMN_1789		11.1778	211.439	68.0264	2.47302	130.733	86.1274	31.7489	9.72236
NWMN_RS10225	NWMN_1790		0	1.34789	4.12526	2.10993	1.62941	1.12687	0	0
NWMN_RS10230			5.16897	47.1166	27.7287	24.1122	41.1793	51.2954	83.0941	38.2592
NWMN_RS10235	NWMN_1791		8.46427	53.0814	52.8586	13.2902	61.9754	28.0987	52.0637	30.5243
NWMN_RS10240	NWMN_1792		8.66117	59.7702	42.3915	8.25622	79.1848	20.0467	52.9597	21.8624
NWMN_RS10245	NWMN_1793		6.29644	46.4733	52.7431	20.0197	69.091	13.8377	27.6615	11.3619
NWMN_RS10250	NWMN_1794		8.14306	47.2012	54.5764	16.4718	109.09	11.8639	26.6935	7.85319
NWMN_RS10255	NWMN_1795		14.6115	38.7462	139.06	40.0669	117.904	30.4055	80.7048	60.1107
NWMN_RS10260			10.7824	24.4447	51.9234	54.4667	40.9459	49.0395	84.2626	54.6969
NWMN_RS10265			13.4877	24.3244	11.0396	9.82222	28.0856	30.2639	151.464	50.4413
NWMN_RS10270			11.0307	24.4901	25.1628	21.6587	31.2088	25.9438	106.309	94.0737
NWMN_RS10275			13.6891	31.9706	73.0995	42.7313	51.839	59.1344	173.947	75.6385
NWMN_RS10280	NWMN_1796		12.4772	35.536	49.7725	29.0965	57.5958	33.6099	50.6889	28.5831
NWMN_RS10285			10.6356	37.0927	31.5548	22.5409	32.9158	13.2692	139.405	100.534
NWMN_RS10290	NWMN_1797		12.5821	33.1356	50.136	19.7075	43.9186	8.74206	136.221	81.5394
NWMN_RS10295	NWMN_1798		12.6275	39.3612	29.096	20.7967	39.4296	18.8848	126.183	42.8982
NWMN_RS10300			8.11568	33.025	33.3754	27.7956	36.5931	29.9301	39.7002	9.55869
NWMN_RS10305	NWMN_1799		10.4152	44.8973	56.1791	14.7419	73.8455	10.1402	90.5569	73.8457
NWMN_RS10310	NWMN_1800		12.4871	45.6617	80.5031	17.563	64.2764	42.9617	89.5751	57.1425
NWMN_RS10315	NWMN_1801		14.2753	37.9754	72.6525	27.0183	71.8365	26.2601	96.8746	80.3992
NWMN_RS10320	NWMN_1802		12.6896	39.6673	48.9701	11.8226	85.7176	27.3827	147.86	125.814
NWMN_RS10325			9.31722	39.074	49.015	8.27338	37.8479	32.3203	54.9111	3.78657
NWMN_RS10330	NWMN_1803		8.93318	38.8501	74.8355	17.9675	52.9296	14.6105	50.3705	53.3301
NWMN_RS10335			10.9778	45.9924	61.1045	12.0873	48.4727	35.5305	59.3288	19.7871
NWMN_RS10340			9.41004	34.3128	60.2956	20.5673	50.8978	9.57843	21.6835	22.0522
NWMN_RS10345	NWMN_1804		12.693	56.5057	111.316	8.55615	75.1381	3.92716	104.408	64.7971
NWMN_RS10350	NWMN_1805		10.2515	46.0032	173.259	140.11	79.8999	69.4156	19.0897	1.86004
NWMN_RS10355	NWMN_1806		257.885	18.0487	139.959	25.7251	149.781	35.5028	240.793	23.5534
NWMN_RS10360	NWMN_1807		11.9626	62.7905	167.482	26.2188	293.445	191.197	45.0891	25.9598
NWMN_RS10365	NWMN_1808		11.5182	83.925	231.055	22.8963	140.566	29.5763	43.9474	15.4426
NWMN_RS10370	NWMN_1809		15.0486	111.466	341.955	8.08134	190.989	50.1406	100.351	49.0008
NWMN_RS10375	NWMN_2621		13.1303	83.9807	231.808	49.3041	94.4331	54.3897	56.3973	72.3287
NWMN_RS10380	NWMN_1810		14.1603	63.5169	223.297	26.0556	83.1557	63.3379	13.3463	3.62086
NWMN_RS10385			18.3067	77.4475	768.726	243.159	575.834	186.932	30.4853	20.7183
NWMN_RS10390			85.6868	6.37542	76.2154	73.4274	130.728	129.806	119.203	174.757
NWMN_RS10395	NWMN_1811		17.905	125.105	889.286	37.0174	539.229	241.312	47.0919	20.6969
NWMN_RS10400			98.4398	111.541	142.234	80.1381	415.815	217.984	78.7286	18.4935
NWMN_RS10405			13.2461	119.788	623.63	72.0083	396.638	75.1753	38.1771	39.3959
NWMN_RS10410	NWMN_1812		80.5582	11.1604	368.311	61.0906	248.077	49.3852	178.688	53.0386
NWMN_RS10415	NWMN_1813		83.1246	19.9524	173.05	33.0462	102.653	29.8597	55.6267	34.5186
NWMN_RS10420			42.1789	4.46217	15.7671	17.9132	8.27176	10.4931	19.2636	4.45616
NWMN_RS10425	NWMN_1814	int	35.4227	6.18218	70.1841	18.1944	78.2529	12.3317	35.6361	22.0821
NWMN_RS10430	NWMN_1815		55.9044	2.5081	144.862	12.8306	98.0326	16.5207	33.2824	7.86785
NWMN_RS10435	NWMN_1816		163.669	6.02952	122.062	13.392	130.562	11.2932	117.444	37.0325
NWMN_RS10440	NWMN_1817	ampS	148.079	7.53065	113.409	39.4687	91.0013	14.0615	56.2443	15.9256
NWMN_RS10445	NWMN_1818		80.6498	13.1393	38.8086	36.085	22.6725	21.5477	10.3232	9.05407
NWMN_RS10450	NWMN_1819		293.57	16.9979	67.6141	24.836	105.711	71.8791	217.861	121.752
NWMN_RS10455	NWMN_1820		407.339	22.3828	160.107	106.905	214.413	89.6545	363.128	83.6423
NWMN_RS10460	NWMN_1821		184.954	19.5529	30.3744	10.279	48.3136	19.2027	143.284	92.7257
NWMN_RS10465	NWMN_1822	vraR	109.71	6.63495	367.48	44.5579	260.153	64.1508	59.5088	39.3101
NWMN_RS10470	NWMN_1823	vraS	91.368	4.73097	217.075	56.9337	150.564	35.3964	21.206	6.43524
NWMN_RS10475	NWMN_1824	vraT, yvqF	64.3213	5.53492	156.383	51.1804	68.4776	12.5014	29.7666	13.803
NWMN_RS10480	NWMN_1825	vraU	50.018	6.53725	136.998	19.5973	35.3223	7.32973	11.5604	5.84182
NWMN_RS10485	NWMN_1826	map	160.169	9.19074	86.8767	13.9171	121.287	28.0757	211.043	21.1319
NWMN_RS10495			33.7309	1.82078	26.8445	14.6115	18.8864	4.96455	17.8947	2.65399
NWMN_RS10500	NWMN_1828		17.5543	2.11203	8.7135	5.65261	6.00506	6.52165	3.73523	1.08333
NWMN_RS10505			0.984323	0.42143	4.22956	2.17581	1.77987	1.18228	0	0
NWMN_RS10510	NWMN_1829		115.426	13.5432	182.637	0.270687	170.224	14.5136	38.6929	14.004
[truncated: 987 more rows]
